# Supplementary material for: Multi-omics characterization of human kidneys identifies cPLA2-arachidonic acid metabolism as a potential driver of inflammation
Source: Research Square preprint supplement (doi:10.21203/rs.3.rs-1461691/v1), 2022-04-07
Supplement: Supplementary file 1 [file 06b4cc1b3f29c09df86d0fb8.pdf]

Supplementary Table 1

| Sample label  | Group   | Kidneys collected | Age (years) | Gender | Cause of death           | eGFR at donation | Diabetes (Yes or No) | Hypertension (Yes or No) | BMI (Kg/m <sup>2</sup> ) | Reason(s) kidney was declined for transplantation         |
|---------------|---------|-------------------|-------------|--------|--------------------------|------------------|----------------------|--------------------------|--------------------------|-----------------------------------------------------------|
| EA1           | Control | 1                 | 48          | M      | Intracranial haemorrhage | 88               | No                   | No                       | 28.38                    | Damage to the renal vein                                  |
| EA2R & EA2L   | AKI     | 2                 | 42          | F      | Intracranial haemorrhage | 40               | No                   | No                       | 23.03                    | Petechiae on both kidneys                                 |
| EA3R & EA3L   | AKI     | 2                 | 74          | M      | Myocardial infarction    | 69               | No                   | Yes                      | 24.97                    | Multiple cysts on both kidneys                            |
| EA4R & EA4L   | Control | 2                 | 67          | F      | Intracranial haemorrhage | 90               | No                   | No                       | 20.57                    | Multiple cysts on both kidneys                            |
| EA5R          | AKI     | 1                 | 50          | F      | Intracranial haemorrhage | 48               | No                   | Yes                      | 31.11                    | Petechiae                                                 |
| EA6R          | Control | 1                 | 70          | M      | Intracranial haemorrhage | 90               | No                   | Yes                      | 26.73                    | Poor perfusion                                            |
| EA7L          | AKI     | 1                 | 64          | M      | Hypoxic brain damage     | 45               | No                   | Yes                      | 29.39                    | 1 cm cyst on kidney                                       |
| EA8L          | Control | 1                 | 72          | M      | Intracranial haemorrhage | 80               | No                   | Yes                      | 25.06                    | Damage to renal vein                                      |
| EA11R & EA11L | Control | 2                 | 73          | M      | Hypoxic brain damage     | 81               | No                   | No                       | 23.46                    | Multiple small cysts on both kidneys                      |
| EA12R & EA12L | AKI     | 2                 | 67          | F      | Intracranial haemorrhage | 67               | No                   | No                       | 23.59                    | Small kidney size                                         |
| EA13R         | AKI     | 1                 | 50          | M      | Hypoxic brain damage     | 25               | No                   | No                       | 27.36                    | Ischaemic bowel                                           |
| EA14          | Control | 1                 | 51          | M      | Intracranial haemorrhage | 90               | No                   | No                       | 24.69                    | Poor perfusion                                            |
| EA15          | AKI     | 1                 | 63          | M      | Intracranial haemorrhage | 46               | No                   | Yes                      | 28.88                    | Atheroma of aortic patch and capsular tear                |
| EA16R & EA16L | AKI     | 2                 | 81          | F      | Intracranial haemorrhage | 54               | No                   | Yes                      | 31.53                    | Single small cyst in both kidneys                         |
| EA18R & EA18L | Control | 2                 | 71          | F      | Intracranial haemorrhage | 88               | No                   | Yes                      | 24.3                     | Two small cysts in left kidney and damage to right ureter |
