# Supplementary material for: Multi-omics characterization of human kidneys identifies cPLA2-arachidonic acid metabolism as a potential driver of inflammation
Source: Research Square preprint supplement (doi:10.21203/rs.3.rs-1461691/v1), 2022-04-07
Supplement: Supplementary file 2 [file 867da01e299c2b1d4915d28f.xlsx]

## Sheet: Sheet1
Lipid class	log2FC	p-value	Adjusted p-value
Carnitine_(14:0-OH)	0.538959	0.209352	0.585137
Carnitine_(14:0)	0.955042	0.0357001	0.278576
Carnitine_(20:5)	-0.346024	0.809405	0.922873
Carnitine_(20:4)	0.705276	0.151737	0.528911
Carnitine_(15:0)	0.322168	0.511562	0.742982
Carnitine_(16:0-OH)	0.561526	0.349369	0.665984
Carnitine_(18:2)	0.595814	0.223024	0.585137
Carnitine_(20:3)	0.19348	0.251205	0.586545
Carnitine_(16:0)	0.512786	0.0357001	0.278576
Carnitine_(18:0-OH)	-0.0695026	0.972539	0.986692
Carnitine_(18:1)	0.291082	0.0513444	0.309334
Carnitine_(17:1)	0.165111	0.704504	0.848884
Carnitine_(17:0)	0.0564595	0.809405	0.922873
Carnitine_(20:2)	-0.20667	0.511562	0.742982
Carnitine_(18:0)	0.0305755	0.557264	0.776986
Carnitine_(20:1)	0.250529	0.511562	0.742982
Carnitine_(22:2)	-0.0347964	0.863267	0.95527
Carnitine_(20:0)	-0.412514	0.426167	0.700234
Carnitine_(22:1)	0.12292	0.653903	0.826696
Carnitine_(21:0)	-1.60728	0.173352	0.556551
Cer_(33:1)	0.912774	0.0196645	0.22317
Cer_(34:1)	0.816236	0.000379909	0.0264851
Cer_(34:0)	2.21448	0.0196645	0.22317
Cer_(36:2-OH)	NA	0.0698161	0.350087
Cer_(35:1)	0.367812	0.0845213	0.378407
Cer_(36:2)	-0.184205	0.972539	0.986692
Cer_(36:1)	0.995045	2.26811e-05	0.00664104
Cer_(36:0)	0.756345	0.0986176	0.414874
Cer_(37:1)	0.654892	0.0158711	0.203819
Cer_(37:0-OH)	NA	0.390828	0.696074
Cer_(40:2)	0.924307	6.80434e-05	0.00664104
Cer_(38:1)	0.631498	0.223024	0.585137
Cer_(39:1)	0.463504	0.0429637	0.2953
Cer_(41:2)	0.646566	0.00619195	0.151084
Cer_(40:1)	0.490227	0.00276143	0.112298
Cer_(42:2)	0.700219	6.80434e-05	0.00664104
Cer_(40:0)	0.253692	0.386679	0.693748
Cer_(41:1)	0.284392	0.197116	0.572575
Cer_(43:2)	0.343269	0.386679	0.693748
Cer_(41:0)	0.481808	0.686705	0.848884
Cer_(42:1)	0.320547	0.426167	0.700234
Cer_(43:1)	-0.0971708	0.557264	0.776986
Cer_(44:1)	-0.00885544	0.972539	0.986692
Cer_(45:1)	NA	0.447005	0.732009
CL_(74:12)	-0.46091	0.251205	0.586545
CL_(70:09)	-0.483379	0.60473	0.79759
CL_(72:10)	-0.00724054	0.972539	0.986692
CL_(68:07)	-0.658699	0.132118	0.495949
CL_(74:11)	-0.0808975	0.511562	0.742982
CL_(76:12)	-0.151956	0.557264	0.776986
CL_(72:09)	-0.676917	0.251205	0.586545
CL_(71:08)	-1.40145	0.0721782	0.350087
CL_(68:06)	-0.780826	0.467855	0.734126
CL_(74:10)	-0.292859	0.314372	0.63657
CL_(70:07)	-0.256273	0.467855	0.734126
CL_(76:11)	-0.376044	0.173352	0.556551
CL_(72:08)	-0.312666	0.114466	0.457864
CL_(69:06)	-0.951256	0.0264946	0.256895
CL_(71:07)	-1.01886	0.0294798	0.256895
CL_(68:05)	-0.793984	0.251205	0.586545
CL_(70:06)	-0.828759	0.60473	0.79759
CL_(72:07)	-0.711292	0.0294798	0.256895
CL_(66:03)	-0.212343	0.809405	0.922873
CL_(69:05)	-1.27165	0.0513444	0.309334
CL_(71:06)	-0.971299	0.0610009	0.333386
CL_(68:04)	-0.75184	0.223024	0.585137
CL_(70:05)	-0.771846	0.653903	0.826696
CL_(66:02)	-0.97626	0.511562	0.742982
CL_(69:04)	-1.22019	0.0720013	0.350087
CL_(72:06)	-0.836089	0.0513444	0.309334
CL_(68:03)	-0.371894	0.653903	0.826696
CL_(70:04)	-0.434665	0.28162	0.610803
CL_(69:03)	-0.902193	0.173352	0.556551
CL_(72:05)	-0.94397	0.0720013	0.350087
CL_(68:02)	-0.993683	0.349369	0.665984
CL_(70:03)	-0.778981	0.426167	0.700234
CL_(69:02)	-1.69623	0.197116	0.572575
CL_(72:04)	-0.536673	0.151737	0.528911
CL_(68:01)	-1.05071	0.314372	0.63657
CL_(74:05)	-0.638103	0.0513444	0.309334
CL_(70:02)	-0.802285	0.467855	0.734126
CL_(72:03)	-0.394628	0.426167	0.700234
CPE_(34:2)	0.412656	0.857674	0.95527
CPE_(36:2)	NA	0.313801	0.63657
CPE_(36:1)	NA	0.226281	0.586545
CPE_(38:2)	-0.299628	0.301668	0.63657
CPE_(42:2)	-0.76893	0.426167	0.700234
CPE_(42:1)	-0.370023	0.397949	0.700234
DGDG_(36:0)	-0.665716	0.010138	0.177331
DG_(40:5)	0.730703	0.0845213	0.378407
DG_(32:0)	NA	NA	NA
DG_(35:3)	NA	0.390828	0.696074
DG_(33:0)	NA	NA	NA
DG_(34:1)	-0.0736734	0.809405	0.922873
DG_(40:4)	0.214199	0.0429637	0.2953
DG_(42:5)	0.348033	0.197116	0.572575
DG_(34:0)	NA	NA	NA
DG_(35:1)	-0.416264	0.28162	0.610803
DG_(36:2)	-0.0370375	0.809405	0.922873
DG_(36:1)	-0.15478	0.511562	0.742982
DG_(36:0)	NA	NA	NA
DG_(40:2)	0.200547	0.223024	0.585137
DG_(42:3)	0.351063	0.0357001	0.278576
DG_(38:2)	-0.0448928	0.60473	0.79759
DG_(38:1)	-0.401792	1	1
GD1_(36:2)	NA	0.643667	0.826696
GD1_(36:1)	NA	NA	NA
GB3_(34:2)	NA	NA	NA
GB4_(34:1)	2.04296	0.0357001	0.278576
GB3_(34:1)	0.89678	0.00205831	0.0968338
GB3_(36:1)	0.565986	0.481179	0.742982
GB3_(38:1)	0.576518	0.0610009	0.333386
GB3_(38:0)	Inf	0.00379973	0.123618
GB4_(42:2)	0.773851	0.00365166	0.123618
GB4_(40:1)	2.14252	0.0170202	0.21297
GB3_(42:3)	0.833974	0.191219	0.572575
GB3_(41:2-OH)	Inf	0.023505	0.256257
GB3_(40:1)	0.292354	0.0429637	0.2953
GB3_(41:1)	0.749371	0.349369	0.665984
GB3_(42:1-OH)	NA	NA	NA
GB4_(42:1)	0.220246	0.0986176	0.414874
GB3_(42:1)	0.165832	0.0986176	0.414874
GM3_(32:1)	-0.243061	0.704504	0.848884
GM3_(34:0)	0.125001	0.704504	0.848884
GM3_(35:1)	NA	0.058267	0.333386
GM2_(36:1)	NA	NA	NA
GM3_(36:1)	-0.407195	0.217234	0.585137
GM3_(36:0)	NA	0.475787	0.741802
GM3_(37:0)	NA	0.887596	0.97355
GM3_(40:1)	-0.0581887	0.314372	0.63657
Hex-Cer_(32:1)	-0.296014	0.467855	0.734126
Hex-Cer_(34:2)	NA	1	1
Hex-Cer_(35:1)	0.157557	0.0513444	0.309334
Hex-Cer_(36:1-OH)	0.0856582	0.972539	0.986692
Hex-Cer_(36:2)	0.427992	0.863267	0.95527
Hex-Cer_(36:1)	-0.155065	0.653903	0.826696
Hex-Cer_(37:2)	0.379133	0.314372	0.63657
Hex-Cer_(37:1)	0.197252	0.00619195	0.151084
Hex-Cer_(38:1)	0.186838	0.151737	0.528911
Hex-Cer_(39:1)	0.192025	0.386679	0.693748
Hex-Cer_(39:0)	-0.0258209	0.863267	0.95527
Hex-Cer_(40:0-OH)	0.362409	0.28162	0.610803
Hex-Cer_(40:0)	0.0178825	0.91769	0.97355
Hex-Cer_(41:1)	0.322421	0.0845213	0.378407
Hex-Cer_(42:2)	-0.627748	0.60473	0.79759
Hex-Cer_(42:1)	0.487054	0.00478572	0.137378
Lacto-cer_(32:1-OH)	-0.141599	0.972539	0.986692
Lacto-cer_(32:1)	-1.252	0.0485707	0.309334
Lacto-cer_(35:2)	NA	NA	NA
Lacto-cer_(34:1-OH)	Inf	0.0647867	0.347427
Lacto-cer_(34:1)	0.303086	0.251205	0.586545
Lacto-cer_(35:1)	Inf	0.0409116	0.2953
Lacto-cer_(36:1-OH)	NA	NA	NA
Lacto-cer_(36:1)	NA	0.691197	0.848884
Lacto-cer_(36:0-OH)	NA	0.741545	0.891315
Lacto-cer_(38:1-OH)	-0.535846	0.173352	0.556551
Lacto-cer_(40:2-OH)	-0.345552	0.805262	0.922873
Lacto-cer_(38:1)	-0.48916	0.349369	0.665984
Lacto-cer_(40:2)	0.482322	0.0241554	0.256257
Lacto-cer_(39:1-OH)	-1.01332	0.0429637	0.2953
Lacto-cer_(40:1-OH)	-0.445465	0.426167	0.700234
Lacto-cer_(42:2-OH)	0.300802	0.704504	0.848884
Lacto-cer_(40:1)	-0.212078	0.653903	0.826696
Lacto-cer_(42:2)	0.385046	0.0720013	0.350087
Lacto-cer_(42:0-OH)	-0.923669	0.251205	0.586545
Lacto-cer_(42:1-OH)	-0.791596	0.28162	0.610803
Lacto-cer_(42:1)	-0.553633	0.704504	0.848884
Lacto-cer_(44:2)	0.554166	0.28162	0.610803
LPC_(14:0)	-0.166372	0.60473	0.79759
LPC_(16:1)	0.289807	0.756444	0.891654
LPC_(18:2)	0.0954713	0.704504	0.848884
LPC_(20:5)	-0.223694	0.386679	0.693748
LPE_(18:2)	0.138168	0.60473	0.79759
LPC_(15:0)	-0.435634	0.28162	0.610803
LPE_(20:5)	-0.512798	0.197116	0.572575
LPC_(17:1)	-0.351655	0.467855	0.734126
LPC_(16:0)	-0.241328	0.511562	0.742982
LPE_(16:0)	-1.17638	0.314372	0.63657
LPC_(18:1)	-0.255016	0.863267	0.95527
LPE_(18:1)	-0.720126	0.467855	0.734126
LPC_(17:0)	-0.512152	0.467855	0.734126
LPE_(17:0)	-0.965767	0.251205	0.586545
LPE_(22:5)	-0.0402639	1	1
LPC_(18:0)	0.111279	0.91769	0.97355
LPC_(22:4)	-0.496868	0.173352	0.556551
LPE_(18:0)	-0.797685	0.467855	0.734126
LPC_(20:3)	0.0400911	0.60473	0.79759
LPE_(20:3)	-0.839369	0.314372	0.63657
LPC_(19:0)	0.75959	0.304065	0.63657
LPC_(20:1)	-0.09882	0.972539	0.986692
LPC_(20:0)	-0.299957	0.511562	0.742982
LPC_(22:3)	0.573571	0.426167	0.700234
LPE_(22:3)	-1.76038	0.426167	0.700234
LPC_(22:2)	NA	0.686705	0.848884
LPC_(22:0)	-0.460633	0.704504	0.848884
LPE_(22:0)	-0.751016	0.777844	0.912471
LPC_(24:0)	-0.407326	0.511562	0.742982
LPI_(20:5)	-2.65702	0.0272309	0.256895
LPI_(18:3)	NA	0.110941	0.457864
LPI_(16:1)	-0.45977	0.28162	0.610803
LPI_(18:2)	-0.067741	0.60473	0.79759
LPI_(20:4)	0.142364	0.91769	0.97355
LPI_(16:0)	-0.227879	0.511562	0.742982
LPI_(20:3)	-0.59957	0.197116	0.572575
LPI_(18:1)	-0.26819	0.223024	0.585137
LPI_(20:2)	-0.955431	0.0357001	0.278576
LPI_(18:0)	0.0775022	0.91769	0.97355
LPI_(20:1)	-1.01082	0.0610009	0.333386
LPI_(20:0)	-0.0443521	0.91769	0.97355
PI_(32:1)	-0.474636	0.386679	0.693748
PI_(36:4)	-0.0953687	0.91769	0.97355
PI_(34:2)	-0.155344	0.557264	0.776986
PI_(38:5)	0.112417	0.91769	0.97355
PI_(36:3)	-0.0845569	0.60473	0.79759
PI_(37:4)	-0.277751	0.197116	0.572575
PI_(35:2)	-0.132847	0.511562	0.742982
PI_(32:0)	-1.27719	0.00205831	0.0968338
PI_(40:6)	0.221404	0.557264	0.776986
PI_(34:1)	-0.447224	0.0429637	0.2953
PI_(38:4)	-0.192767	0.704504	0.848884
PI_(40:5)	0.160138	0.756444	0.891654
PI_(36:2)	-0.408879	0.251205	0.586545
PI_(35:1)	-1.06627	6.80434e-05	0.00664104
PI_(38:3)	-0.369679	0.0845213	0.378407
PI_(34:0)	-2.66621	0.00218273	0.0968338
PI_(40:4)	0.043148	0.91769	0.97355
PI_(36:1)	-0.963384	0.0127184	0.177331
PI_(38:2)	-1.24666	0.0127184	0.177331
PI_(37:1)	-2.6691	3.9692e-05	0.00664104
Mono-lyso_CL_(52:05)	-0.87686	0.972539	0.986692
Mono-lyso_CL_(54:06)	-0.373948	0.223024	0.585137
Mono-lyso_CL_(54:05)	-0.734958	0.314372	0.63657
Mono-lyso_CL_(56:05)	-0.330089	0.349369	0.665984
Mono-lyso_CL_(52:01)	-0.126838	0.863267	0.95527
MGDG_(34:3)	-0.429784	0.223024	0.585137
MGDG_(34:2)	0.581285	0.0429637	0.2953
MGDG_(34:1)	-0.166059	0.467855	0.734126
MGDG_(36:1)	0.594918	0.646728	0.826696
MGDG_(38:1)	0.533792	0.242197	0.586545
PC_(34:4)	-0.0745878	0.60473	0.79759
PC_(32:2)	0.159147	0.426167	0.700234
PC_(34:3)	0.00922167	0.557264	0.776986
PC_(36:5)	-0.422802	0.197116	0.572575
PC_(33:2)	-0.129368	0.426167	0.700234
PC_(30:0)	0.21651	0.349369	0.665984
PC_(35:3)	-0.267535	0.173352	0.556551
PC_(38:6)	-0.0731206	0.91769	0.97355
PC_(32:1)	0.159833	0.511562	0.742982
PC_(36:4)	0.0778465	0.197116	0.572575
PC_(38:5)	0.161826	0.426167	0.700234
PC_(34:2)	0.0717534	0.511562	0.742982
PC_(36:3)	-0.00319892	0.91769	0.97355
PC_(39:6)	-0.419329	0.557264	0.776986
PC_(31:0)	-0.191262	0.60473	0.79759
PC_(33:1)	-0.206329	0.314372	0.63657
PC_(40:7)	-0.199223	0.653903	0.826696
PC_(37:4)	0.324445	0.223024	0.585137
PC_(35:2)	-0.173043	0.314372	0.63657
PC_(37:3)	-0.594738	0.00478572	0.137378
PC_(32:0)	0.298434	0.132118	0.495949
PC_(40:6)	-0.151055	0.972539	0.986692
PC_(34:1)	-0.111308	0.91769	0.97355
PC_(38:4)	0.419734	0.0127184	0.177331
PC_(40:5)	0.0171122	0.197116	0.572575
PC_(36:2)	0.075351	0.251205	0.586545
PC_(33:0)	0.0178358	0.653903	0.826696
PC_(35:1)	-0.353694	0.114466	0.457864
PC_(38:3)	-0.147226	0.863267	0.95527
PC_(37:2)	0.00581826	0.60473	0.79759
PC_(40:4)	0.146326	0.173352	0.556551
PC_(42:7)	2.22508	0.00135037	0.0823726
PC_(34:0)	0.209583	0.151737	0.528911
PC_(38:2)	0.0328928	0.863267	0.95527
PC_(36:1)	-0.0540388	1	1
PC_(40:3)	0.0272585	0.704504	0.848884
PC_(38:1)	NA	0.469944	0.735041
PC_(37:1)	0.278894	0.704504	0.848884
PC_(35:0)	NA	0.959046	0.986692
PC_(40:2)	-0.194793	0.60473	0.79759
PC_(36:0)	-0.447021	0.0720013	0.350087
PC_(40:1)	-0.22098	0.557264	0.776986
PC_(39:0)	-0.0929135	0.751256	0.891654
PC_(42:1)	NA	NA	NA
PE_(36:2)	-0.203573	0.349369	0.665984
PE_(38:8)	-0.661432	0.511562	0.742982
PE_(42:11)	NA	0.269845	0.610803
PE_(37:6)	NA	0.643667	0.826696
PE_(38:6)	-0.17278	0.28162	0.610803
PE_(30:0)	NA	0.189313	0.572575
PE_(32:1)	-0.13672	0.386679	0.693748
PE_(36:4)	-0.109102	0.809405	0.922873
PE_(40:8)	-0.375502	0.123004	0.488017
PE_(34:2)	-0.0549177	0.511562	0.742982
PE_(38:5)	-0.737759	0.386679	0.693748
PE_(31:0)	NA	1	1
PE_(36:3)	2.53243	0.0512727	0.309334
PE_(35:2)	NA	0.226281	0.586545
PE_(32:0)	0.465354	0.0513444	0.309334
PE_(40:6)	0.145275	0.91769	0.97355
PE_(34:1)	-0.285776	0.314372	0.63657
PE_(40:7)	-0.437446	0.557264	0.776986
PE_(38:4)	0.104705	0.809405	0.922873
PE_(35:1)	-0.418151	0.132118	0.495949
PE_(38:3)	-0.102779	0.251205	0.586545
PE_(40:5)	0.528868	0.426167	0.700234
PE_(40:4)	0.596611	0.00794974	0.177331
PE_(34:0)	0.431202	0.511562	0.742982
PE_(36:1)	-0.133999	0.386679	0.693748
PE_(38:2)	-0.373588	0.653903	0.826696
PE_(40:3)	-0.14853	0.217683	0.585137
PE_(38:1)	0.149553	0.60473	0.79759
PE_(40:2)	0.317636	0.756444	0.891654
PG_(38:6)	-1.35784	0.0127184	0.177331
PG_(32:1)	-0.349765	0.251205	0.586545
PG_(36:4)	-0.267366	0.972539	0.986692
PG_(34:2)	-0.181056	0.28162	0.610803
PG_(33:1)	-0.447287	0.251205	0.586545
PG_(36:3)	-0.216185	0.349369	0.665984
PG_(37:4)	-1.21613	0.458208	0.734126
PG_(35:2)	-0.143217	0.386679	0.693748
PG_(34:1)	-0.172212	0.314372	0.63657
PG_(38:4)	0.216176	0.151737	0.528911
PG_(35:1)	-0.52841	0.0610009	0.333386
PG_(34:0)	0.259801	0.00619195	0.151084
PG_(36:1)	0.0225493	0.972539	0.986692
PS_(32:1)	-0.113228	0.860079	0.95527
PS_(34:2)	0.00991774	0.91769	0.97355
PS_(34:1)	0.0403856	0.972539	0.986692
PS_(38:4)	-0.0553979	0.704504	0.848884
PS_(36:2)	-0.125339	0.511562	0.742982
PS_(35:1)	-0.253254	0.251205	0.586545
PS_(40:4)	0.419821	0.0513444	0.309334
PS_(35:0)	-0.135464	0.863267	0.95527
PS_(36:1)	-0.125488	0.386679	0.693748
PS_(38:2)	0.115855	0.511562	0.742982
PS_(38:1)	-0.0460665	0.809405	0.922873
PS_(39:1)	0.100093	0.971822	0.986692
PS_(40:2)	0.365512	0.173352	0.556551
PS_(40:1)	-0.284723	0.173352	0.556551
SM_(32:1)	-0.357951	0.223024	0.585137
SM_(32:0)	-0.122381	0.653903	0.826696
SM_(33:1)	-0.365858	0.0127184	0.177331
SM_(34:1-OH)	-0.231482	0.197116	0.572575
SM_(33:0)	-0.504801	0.805076	0.922873
SM_(34:1)	-0.122428	0.223024	0.585137
SM_(36:2)	0.0320679	0.972539	0.986692
SM_(34:0)	-0.535436	0.0127184	0.177331
SM_(35:1)	-0.564373	0.0127184	0.177331
SM_(37:2)	-0.23377	0.349369	0.665984
SM_(36:1)	-0.582122	0.0158711	0.203819
SM_(38:2)	-0.229855	0.972539	0.986692
SM_(36:0)	-0.517875	0.132118	0.495949
SM_(37:1)	-0.832179	0.0127184	0.177331
SM_(37:0)	-0.0728892	0.915329	0.97355
SM_(38:1)	-0.444868	0.0196645	0.22317
SM_(40:2)	-0.329304	0.28162	0.610803
SM_(38:0)	-0.720552	0.0100931	0.177331
SM_(39:1)	-0.525305	0.0294798	0.256895
SM_(40:0-OH)	-0.599888	0.114466	0.457864
SM_(42:2)	-0.168563	0.197116	0.572575
SM_(40:1)	-0.327578	0.0127184	0.177331
SM_(40:0)	-0.593656	0.0294798	0.256895
SM_(41:1)	-0.506972	0.0196645	0.22317
SM_(42:0-OH)	-0.765548	0.0241554	0.256257
SM_(41:0)	-0.86999	0.0610009	0.333386
SM_(44:2)	-0.494144	0.173352	0.556551
SM_(42:1)	-0.407058	0.0294798	0.256895
SM_(42:0)	-0.961962	0.0986176	0.414874
SM_(43:1)	-0.470155	0.0513444	0.309334
SM_(44:1)	-0.586082	0.151737	0.528911
S_(32:2)	0.428045	0.307069	0.63657
S_(32:1-OH)	-0.411005	0.0720013	0.350087
S_(32:1)	-0.225441	0.426167	0.700234
S_(33:1-OH)	-3.62424	0.0824664	0.378407
S_(32:0)	-0.249835	0.349369	0.665984
S_(33:1)	-0.635945	0.511562	0.742982
S_(34:1-OH)	-0.591664	0.197116	0.572575
S_(34:1)	-0.148927	0.809405	0.922873
S_(34:0)	-0.418428	0.349369	0.665984
S_(35:1)	-0.582062	0.0720013	0.350087
S_(37:2)	0.119056	0.60473	0.79759
S_(38:2-OH)	Inf	0.0698161	0.350087
S_(36:1)	0.432441	0.426167	0.700234
S_(40:2-OH)	-0.320634	0.459088	0.734126
S_(38:1)	-0.366036	0.223024	0.585137
S_(40:1-OH)	-0.704438	0.0845213	0.378407
S_(40:1)	1.20433	0.2735	0.610803
S_(41:1)	-0.109207	0.60473	0.79759
S_(42:1-OH)	-0.639714	0.28162	0.610803
S_(44:2)	0.479465	0.426167	0.700234
S_(42:1)	0.135508	0.972539	0.986692
S_(43:1)	-0.0916279	0.704504	0.848884
S_(44:1)	0.15014	0.970751	0.986692
TG_(36:0)	0.825329	0.511562	0.742982
TG_(42:2)	0.543481	0.314372	0.63657
TG_(42:1)	0.194578	0.426167	0.700234
TG_(44:2)	-0.00523776	0.426167	0.700234
TG_(46:3)	0.619882	0.132118	0.495949
TG_(48:4)	1.13103	0.0724565	0.350087
TG_(43:1)	-0.632287	0.653903	0.826696
TG_(45:2)	-0.507145	0.704504	0.848884
TG_(58:11)	0.48662	0.386679	0.693748
TG_(50:5)	1.25491	0.0845213	0.378407
TG_(42:0)	0.321492	0.386679	0.693748
TG_(44:1)	-0.0635897	0.349369	0.665984
TG_(46:2)	0.694149	0.151737	0.528911
TG_(48:3)	0.990895	0.0986176	0.414874
TG_(43:0)	-0.138715	0.863267	0.95527
TG_(56:8)	1.3362	0.0127184	0.177331
TG_(45:1)	0.522511	0.324049	0.653455
TG_(50:4)	1.62482	0.0986176	0.414874
TG_(47:2)	0.493261	0.426167	0.700234
TG_(52:5)	1.44686	0.0610009	0.333386
TG_(58:9)	1.19808	0.00365166	0.123618
TG_(49:3)	0.86713	0.251205	0.586545
TG_(54:6)	1.40434	0.0429637	0.2953
TG_(44:0)	0.555166	0.132118	0.495949
TG_(58:8)	1.92362	0.0100647	0.177331
TG_(46:1)	0.4435	0.223024	0.585137
TG_(48:2)	0.996416	0.151737	0.528911
TG_(56:7)	1.47455	0.0294798	0.256895
TG_(50:3)	1.1993	0.151737	0.528911
TG_(45:0)	0.314898	0.698162	0.848884
TG_(52:4)	1.38313	0.0986176	0.414874
TG_(47:1)	0.0825004	0.548952	0.776986
TG_(54:5)	1.32682	0.0294798	0.256895
TG_(49:2)	0.538406	0.223024	0.585137
TG_(51:3)	0.84785	0.251205	0.586545
TG_(55:6)	1.27725	0.114466	0.457864
TG_(53:4)	0.635897	0.251205	0.586545
TG_(56:6)	1.37313	0.0158711	0.203819
TG_(46:0)	0.710539	0.223024	0.585137
TG_(58:7)	1.31418	0.0357001	0.278576
TG_(48:1)	0.337427	0.349369	0.665984
TG_(50:2)	0.772541	0.28162	0.610803
TG_(55:5)	1.14928	0.114466	0.457864
TG_(52:3)	1.02041	0.151737	0.528911
TG_(47:0)	0.0092289	0.863267	0.95527
TG_(54:4)	1.23734	0.0845213	0.378407
TG_(49:1)	0.0399969	0.756444	0.891654
TG_(59:6)	1.00762	0.765632	0.90031
TG_(51:2)	0.0628115	0.653903	0.826696
TG_(56:5)	1.18336	0.0610009	0.333386
TG_(53:3)	0.361338	0.467855	0.734126
TG_(58:6)	Inf	0.0614852	0.333386
TG_(50:1)	0.374984	0.426167	0.700234
TG_(52:2)	0.179135	0.386679	0.693748
TG_(48:0)	0.624919	0.386679	0.693748
TG_(54:3)	0.38745	0.173352	0.556551
TG_(49:0)	0.280967	0.972539	0.986692
TG_(56:4)	0.901865	0.197116	0.572575
TG_(51:1)	-0.287162	0.972539	0.986692
TG_(53:2)	-0.512703	0.756444	0.891654
TG_(59:5)	-0.578031	0.751021	0.891654
TG_(55:3)	0.0661728	0.557264	0.776986
TG_(58:5)	Inf	0.000166569	0.0135476
TG_(50:0)	0.205482	0.653903	0.826696
TG_(52:1)	-0.000554597	0.653903	0.826696
TG_(54:2)	0.043795	0.557264	0.776986
TG_(56:3)	0.373052	0.251205	0.586545
TG_(53:1)	-0.746133	0.28162	0.610803
TG_(55:2)	-0.176412	0.863267	0.95527
TG_(56:2)	0.271212	0.557264	0.776986
TG_(52:0)	-0.140708	0.756444	0.891654
TG_(54:1)	-0.0538619	0.511562	0.742982
TG_(55:1)	-0.0980336	0.459088	0.734126
TG_(53:0)	-0.130421	0.251205	0.586545
TG_(54:0)	-0.45982	0.192522	0.572575
TG_(58:2)	-0.0730471	0.91769	0.97355
TG_(55:0)	Inf	0.211821	0.585137
TG_(57:1)	NA	0.909166	0.97355
TG_(56:0)	-0.0751465	0.803119	0.922873
TG_(58:1)	-0.664741	0.571951	0.795191
TG_(57:0)	Inf	0.0359637	0.278576
TG_(58:0)	-0.551776	0.597287	0.79759
TG_(60:0)	NA	0.153814	0.532348
FFA_(12:0)	0.0864931	0.60473	0.79759
FFA_(20:5)	-0.983759	0.0294798	0.256895
FFA_(18:3)	-0.257068	0.91769	0.97355
FFA_(14:0)	-0.0341799	0.557264	0.776986
FFA_(16:1)	0.162353	0.386679	0.693748
FFA_(22:6)	-0.423784	0.251205	0.586545
FFA_(20:4)	-0.225942	0.511562	0.742982
FFA_(18:2)	-0.0164724	0.426167	0.700234
FFA_(15:0)	-0.0947108	0.132118	0.495949
FFA_(22:5)	-0.0390534	0.704504	0.848884
FFA_(17:1)	-0.254734	1	1
FFA_(20:3)	-0.133764	0.386679	0.693748
FFA_(16:0)	-0.0516724	0.426167	0.700234
FFA_(22:4)	0.550957	0.0127184	0.177331
FFA_(18:1)	0.0988729	0.972539	0.986692
FFA_(20:2)	0.0832596	1	1
FFA_(17:0)	-0.0386819	0.60473	0.79759
FFA_(20:1)	0.231739	0.251205	0.586545
FFA_(22:3)	-0.0987034	0.91769	0.97355
FFA_(18:0)	-0.128506	0.426167	0.700234
FFA_(22:2)	-0.260925	0.28162	0.610803
FFA_(20:0)	-0.122956	0.349369	0.665984
FFA_(22:1)	0.0415214	0.704504	0.848884
