# Supplementary material for: Multi-omics characterization of human kidneys identifies cPLA2-arachidonic acid metabolism as a potential driver of inflammation
Source: Research Square preprint supplement (doi:10.21203/rs.3.rs-1461691/v1), 2022-04-07
Supplement: Supplementary file 3 [file 9edf3f51a1cab3b837c448db.xlsx]

## Sheet: Sheet1
m/z	log2FC	Adjusted p-value	KEGG_id	Adduct	KEGG_name
96.0423	-0.583595	0.201006	C01888	M+Na [1+]	Aminoacetone
96.0423	-0.583595	0.201006	C05665	M+Na [1+]	3-Aminopropionaldehyde
111.042	-0.193235	0.78893	C00246	M+Na [1+]	Butyric acid
115.037	0.279642	0.586421	C00116	M+Na [1+]	Glycerol
116.07	0.464957	0.349376	C00763	M+H [1+]	D-Proline
116.07	0.464957	0.349376	C00148	M+H [1+]	L-Proline
118.087	0.616723	0.888183	C00719	M+H [1+]	Betaine
118.087	0.616723	0.888183	C00183	M+H [1+]	L-Valine
122.096	0.436041	0.132997	C05332	M+H [1+]	Phenylethylamine
125.021	0.0983226	0.97015	C00164	M+Na [1+]	Acetoacetic acid
125.021	0.0983226	0.97015	C00232	M+Na [1+]	Succinic acid semialdehyde
125.021	0.0983226	0.97015	C00109	M+Na [1+]	2-Ketobutyric acid
125.021	0.0983226	0.97015	C06002	M+Na [1+]	(S)-Methylmalonic acid semialdehyde
125.021	0.0983226	0.97015	C00349	M+Na [1+]	2-Methyl-3-oxopropanoic acid
136.062	1.49796	0.252452	C00147	M+H [1+]	Adenine
140.994	0.822433	0.359129	C00227	M+H [1+]	Acetylphosphate
140.994	0.822433	0.359129	C00164	M+K [1+]	Acetoacetic acid
140.994	0.822433	0.359129	C00232	M+K [1+]	Succinic acid semialdehyde
140.994	0.822433	0.359129	C00109	M+K [1+]	2-Ketobutyric acid
140.994	0.822433	0.359129	C06002	M+K [1+]	(S)-Methylmalonic acid semialdehyde
140.994	0.822433	0.359129	C00349	M+K [1+]	2-Methyl-3-oxopropanoic acid
146.092	1.52024	0.975051	C01035	M+H [1+]	4-Guanidinobutanoic acid
146.165	-0.819256	0.157447	C00315	M+H [1+]	Spermidine
151.047	-0.0230715	0.999989	C21028	M+Na [1+]	(R)-5,6-Dihydrothymine
153.052	0.101761	0.807264	C00233	M+Na [1+]	Ketoleucine
154.974	-1.13109	0.0607401	C00122	M+K [1+]	Fumaric acid
155.043	2.23843	0.368192	C02642	M+Na [1+]	Ureidopropionic acid
155.043	2.23843	0.368192	C00152	M+Na [1+]	L-Asparagine
156.042	0.933979	0.581013	C00719	M+K [1+]	Betaine
156.042	0.933979	0.581013	C00183	M+K [1+]	L-Valine
156.076	1.15536	0.239123	C00135	M+H [1+]	L-Histidine
158.044	0.998036	0.63285	C02220	M+H [1+]	2-Aminomuconic acid
158.044	0.998036	0.63285	C00147	M+Na [1+]	Adenine
161.059	-0.352384	0.2459	C03012	M+H [1+]	Naphthalene-1,2-diol
163.048	0.457976	0.721743	C05828	M+Na [1+]	Methylimidazoleacetic acid
163.107	0.811706	0.575421	C16741	M+H [1+]	5-Hydroxylysine
163.107	0.811706	0.575421	G10618	M+H [1+]	Dolichyl D-glucosyl phosphate
163.107	0.811706	0.575421	G10617	M+H [1+]	NA
163.107	0.811706	0.575421	G13027	M+H [1+]	NA
163.978	0.638538	0.0931907	C00245	M+K [1+]	Taurine
164.008	1.12191	0.0194913	C00346	M+Na [1+]	O-Phosphoethanolamine
168.063	1.06606	0.511452	C04076	M+Na [1+]	Allysine
168.063	1.06606	0.511452	C02946	M+Na [1+]	4-Acetamidobutanoic acid
168.99	-1.13025	0.0881391	C00074	M+H [1+]	Phosphoenolpyruvic acid
170.033	0.0291051	0.999579	C00300	M+K [1+]	Creatine
170.042	0.24656	0.333629	C00025	M+Na [1+]	L-Glutamic acid
170.042	0.24656	0.333629	C05938	M+Na [1+]	L-4-Hydroxyglutamate semialdehyde
170.042	0.24656	0.333629	C00217	M+Na [1+]	D-Glutamic acid
172.04	4.94659	0.30748	C00073	M+Na [1+]	L-Methionine
175.057	1.32811	0.0333809	C00532	M+Na [1+]	L-Arabitol
175.057	1.32811	0.0333809	C00379	M+Na [1+]	D-Xylitol
175.071	0.656443	0.852133	C00439	M+H [1+]	Formiminoglutamic acid
175.108	-0.998071	0.0012071	C00437	M+H [1+]	N-Acetylornithine
175.119	0.936332	0.208873	C00062	M+H [1+]	L-Arginine
175.119	0.936332	0.208873	C00792	M+H [1+]	D-Arginine
176.068	3.27655	0.232861	C03758	M+Na [1+]	Dopamine
177.039	0.00393507	1	C02670	M+H [1+]	D-Glucurono-6,3-lactone
177.05	-0.44995	0.082473	C00438	M+H [1+]	Ureidosuccinic acid
183.041	0.464656	0.26145	C03012	M+Na [1+]	Naphthalene-1,2-diol
183.099	0.1989	0.744942	C16651	M+Na [1+]	3-Hydroxyvalproic acid
184.059	0.251743	0.247048	C00956	M+Na [1+]	Aminoadipic acid
185.032	2.09402	0.906651	C00064	M+K [1+]	L-Glutamine
185.032	2.09402	0.906651	C21029	M+K [1+]	(R)-3-Ureidoisobutyrate
185.032	2.09402	0.906651	C00819	M+K [1+]	D-Glutamine
185.041	0.0201145	0.99863	C03827	M+Na [1+]	2-Dehydro-3-deoxy-L-fuconate
185.058	0.13727	0.785542	C06205	M+Na [1+]	1,2-Dihydronaphthalene-1,2-diol
187.058	0.0940911	0.950977	C01019	M+Na [1+]	L-Fucose
188.068	1.60705	0.209042	C00079	M+Na [1+]	L-Phenylalanine
191.067	0.240464	0.283021	C06459	M+Na [1+]	Phosphorylcholine
192.043	3.97767	0.157554	C03758	M+K [1+]	Dopamine
193.046	0.183176	0.535519	C05576	M+Na [1+]	3,4-Dihydroxyphenylglycol
195.136	-0.189497	0.974874	C01571	M+Na [1+]	Capric acid
196.036	1.37106	0.999496	C14040	M+Na [1+]	1-Nitronaphthalene
197.053	0.517528	0.0649386	C00439	M+Na [1+]	Formiminoglutamic acid
197.101	1.04189	0.766184	C00062	M+Na [1+]	L-Arginine
197.101	1.04189	0.766184	C00792	M+Na [1+]	D-Arginine
200.032	0.593356	0.0280893	C00956	M+K [1+]	Aminoadipic acid
200.068	0.770199	0.0451437	C00487	M+K [1+]	Malonyl-Carnitin
201.037	-0.0263764	0.998967	C00198	M+Na [1+]	Gluconolactone
201.037	-0.0263764	0.998967	C01040	M+Na [1+]	L-Gulonolactone
202.048	0.503464	0.187407	C01586	M+Na [1+]	Hippuric acid
202.068	0.795453	0.11729	C00329	M+Na [1+]	Glucosamine
203.053	0.935209	0.0183652	C00221	M+Na [1+]	D-Glucose
203.053	0.935209	0.0183652	C00267	M+Na [1+]	Alpha-D-Glucose
203.053	0.935209	0.0183652	C00095	M+Na [1+]	D-Fructose
203.053	0.935209	0.0183652	C00159	M+Na [1+]	D-Mannose
203.053	0.935209	0.0183652	C00124	M+Na [1+]	D-Galactose
203.053	0.935209	0.0183652	C00984	M+Na [1+]	D-Galactose
203.053	0.935209	0.0183652	C00031	M+Na [1+]	D-Glucose
203.053	0.935209	0.0183652	C00137	M+Na [1+]	myo-Inositol
203.053	0.935209	0.0183652	C13747	M+Na [1+]	Paraxanthine
203.053	0.935209	0.0183652	C07480	M+Na [1+]	Theobromine
203.053	0.935209	0.0183652	C02336	M+Na [1+]	D-Fructose
204.043	2.81138	0.09293	C00079	M+K [1+]	L-Phenylalanine
204.064	2.53228	0.333417	C00082	M+Na [1+]	L-Tyrosine
205.047	2.97039	0.0142766	C05583	M+Na [1+]	3-Methoxy-4-hydroxyphenylglycolaldehyde
205.047	2.97039	0.0142766	C05582	M+Na [1+]	Homovanillic acid
206.057	0.689478	0.377989	C05587	M+K [1+]	3-Methoxytyramine
207.063	-0.153309	0.72195	C05594	M+Na [1+]	Vanylglycol
207.063	-0.153309	0.72195	C00588	M+Na [1+]	Phosphorylcholine
210.092	3.26135	0.620939	C16604	M+H [1+]	2-Hydroxyiminostilbene
213.074	0.181598	0.428416	C00062	M+K [1+]	L-Arginine
213.074	0.181598	0.428416	C00792	M+K [1+]	D-Arginine
215.031	0.861554	0.0437467	C00672	M+H [1+]	Deoxyribose 1-phosphate
215.031	0.861554	0.0437467	C00673	M+H [1+]	Deoxyribose 5-phosphate
216.064	0.40709	0.181622	C01233	M+H [1+]	Glycerylphosphorylethanolamine
216.064	0.40709	0.181622	C16595	M+Na [1+]	4-Hydroxy-5-phenyltetrahydro-1,3-oxazin-2-one
216.064	0.40709	0.181622	C16587	M+Na [1+]	3-Carbamoyl-2-phenylpropionaldehyde
218.021	0.551971	0.72257	C01586	M+K [1+]	Hippuric acid
219.026	1.60924	0.000459393	C00221	M+K [1+]	D-Glucose
219.026	1.60924	0.000459393	C00267	M+K [1+]	Alpha-D-Glucose
219.026	1.60924	0.000459393	C00095	M+K [1+]	D-Fructose
219.026	1.60924	0.000459393	C00159	M+K [1+]	D-Mannose
219.026	1.60924	0.000459393	C00124	M+K [1+]	D-Galactose
219.026	1.60924	0.000459393	C00984	M+K [1+]	D-Galactose
219.026	1.60924	0.000459393	C00031	M+K [1+]	D-Glucose
219.026	1.60924	0.000459393	C00137	M+K [1+]	myo-Inositol
219.026	1.60924	0.000459393	C02336	M+K [1+]	D-Fructose
220.094	0.731443	0.334116	C05588	M+Na [1+]	Metanephrine
221.022	1.3954	0.495094	C05583	M+K [1+]	3-Methoxy-4-hydroxyphenylglycolaldehyde
221.022	1.3954	0.495094	C05582	M+K [1+]	Homovanillic acid
221.022	1.3954	0.495094	C16550	M+Na [1+]	3-Dechloroethylifosfamide
223.167	-0.0463666	0.992368	C02679	M+Na [1+]	Dodecanoic acid
223.972	1.20687	0.0165054	C01005	M+K [1+]	Phosphoserine
225.086	0.210815	0.437554	C05651	M+H [1+]	5-Hydroxykynurenine
225.086	0.210815	0.437554	C03227	M+H [1+]	L-3-Hydroxykynurenine
227.077	3.12654	0.247475	C16365	M+H [1+]	5-Acetylamino-6-formylamino-3-methyluracil
233.043	0.651686	0.295518	C01068	M+H [1+]	D-Ribitol 5-phosphate
233.043	0.651686	0.295518	C07481	M+K [1+]	Caffeine
233.114	0.166128	0.473549	C21015	M+H [1+]	gamma-L-Glutamyl-L-2-aminobutyrate
236.069	-0.49412	0.155684	C05588	M+K [1+]	Metanephrine
237.087	1.08532	0.00157181	C02700	M+H [1+]	L-Formylkynurenine
238.044	-0.463768	0.415603	C01233	M+Na [1+]	Glycerylphosphorylethanolamine
240.131	0.0488327	0.999997	C05341	M+Na [1+]	beta-Alanyl-L-lysine
241.094	2.21326	0.0137904	C00978	M+Na [1+]	N-Acetylserotonin
242.164	-0.520396	0.568473	G00001	M+K [1+]	NA
242.164	-0.520396	0.568473	G00023	M+K [1+]	Tn antigen
242.164	-0.520396	0.568473	G00143	M+K [1+]	(GlcNAc)1 (Ino-P)1
243.073	0.80191	0.999983	C03366	M+H [1+]	5-phosphonooxy-L-lysine
243.073	0.80191	0.999983	C00643	M+Na [1+]	5-Hydroxy-L-tryptophan
243.098	0.472115	0.0511778	C00214	M+H [1+]	Thymidine
244.079	0.0966619	0.985807	C00140	M+Na [1+]	N-Acetyl-D-glucosamine
244.079	0.0966619	0.985807	C00645	M+Na [1+]	N-Acetylmannosamine
245.043	0.651465	0.0835652	C02985	M+H [1+]	Fucose 1-phosphate
248.033	0.441287	0.439976	C00018	M+H [1+]	Pyridoxal 5'-phosphate
248.033	0.441287	0.439976	C16591	M+K [1+]	3-Carbamoyl-2-phenylpropionic acid
251.197	-0.186049	0.867758	C06424	M+Na [1+]	Myristic acid
253.082	0.323934	0.195417	C05648	M+H [1+]	5-Hydroxy-N-formylkynurenine
255.096	0.133601	0.775307	C21015	M+Na [1+]	gamma-L-Glutamyl-L-2-aminobutyrate
263.11	0.533431	0.286387	C00884	M+Na [1+]	Homocarnosine
263.11	0.533431	0.286387	C01262	M+Na [1+]	Anserine
265.117	0.693392	0.517104	C05642	M+H [1+]	Acetyl-N-formyl-5-methoxykynurenamine
267.06	0.716815	0.182775	C00299	M+Na [1+]	Uridine
271.069	0.589588	0.0627288	C21015	M+K [1+]	gamma-L-Glutamyl-L-2-aminobutyrate
275.074	0.414333	0.187193	C05512	M+Na [1+]	Deoxyinosine
277.14	0.384011	0.149325	C00449	M+H [1+]	Saccharopine
279.23	-0.490382	0.102622	C00249	M+Na [1+]	Palmitic acid
281.003	0.899503	0.00478739	C01236	M+Na [1+]	6-Phosphonoglucono-D-lactone
281.246	-0.311992	0.576545	C01595	M+H [1+]	Linoleic acid
285.049	0.996448	0.0458852	C16633	M+Na [1+]	5-Fluorouridine
290.087	7.16763	0.00643538	C00212	M+Na [1+]	Adenosine
290.087	7.16763	0.00643538	C00330	M+Na [1+]	Deoxyguanosine
291.056	0.168977	0.882197	C07535	M+K [1+]	Benzo[a]pyrene
291.07	1.38548	0.000469875	C00294	M+Na [1+]	Inosine
291.139	0.424341	0.221262	C19490	M+H [1+]	trans-3,4-Dihydro-3,4-dihydroxy-7,12-dimethylbenz[a]anthracene
291.139	0.424341	0.221262	C19607	M+H [1+]	trans-5,6-Dihydro-5,6-dihydroxy-7,12-dimethylbenz[a]anthracene
291.23	-0.194034	0.711474	C04295	M+H [1+]	5-Androstenediol
291.23	-0.194034	0.711474	C04373	M+H [1+]	Etiocholanolone
291.23	-0.194034	0.711474	C00523	M+H [1+]	Androsterone
291.23	-0.194034	0.711474	C03917	M+H [1+]	Dihydrotestosterone
291.23	-0.194034	0.711474	C05293	M+H [1+]	5b-Dihydrotestosterone
295.166	0.522909	0.224436	C00951	M+Na [1+]	Estradiol
296.066	0.18079	0.993657	C00670	M+K [1+]	Glycerophosphocholine
299.12	0.213746	0.390163	C00449	M+Na [1+]	Saccharopine
299.199	0.484691	0.0342572	C16300	M+Na [1+]	Stearidonic acid
303.075	1.51917	0.651615	C05642	M+K [1+]	Acetyl-N-formyl-5-methoxykynurenamine
303.231	-0.575958	0.501746	C06428	M+H [1+]	Eicosapentaenoic acid
303.231	-0.575958	0.501746	C01595	M+Na [1+]	Linoleic acid
305.245	-0.189796	0.630546	C00712	M+Na [1+]	Oleic acid
306.06	9.17692	0.020857	C00212	M+K [1+]	Adenosine
306.06	9.17692	0.020857	C00330	M+K [1+]	Deoxyguanosine
307.043	1.76162	9.76434e-05	C00294	M+K [1+]	Inosine
307.052	0.916617	0.00367099	C14556	M+K [1+]	9-Hydroxybenzo[a]pyrene
307.052	0.916617	0.00367099	C14851	M+K [1+]	Benzo[a]pyrene-4,5-oxide
307.052	0.916617	0.00367099	C14850	M+K [1+]	Benzo[a]pyrene-7,8-oxide
307.052	0.916617	0.00367099	C14849	M+K [1+]	Benzo[a]pyrene-9,10-oxide
307.203	0.640962	0.0988618	C00376	M+Na [1+]	Retinal
307.203	0.640962	0.0988618	C02110	M+Na [1+]	11-cis-Retinaldehyde
307.203	0.640962	0.0988618	C16681	M+Na [1+]	9-cis-Retinal
307.203	0.640962	0.0988618	C21797	M+Na [1+]	Vitamin A2
309.146	0.561614	0.139555	C05298	M+Na [1+]	2-Hydroxyestrone
309.146	0.561614	0.139555	C05300	M+Na [1+]	16b-Hydroxyestrone
309.183	0.606594	0.318384	C00280	M+Na [1+]	Androstenedione
311.162	0.733165	0.0292157	C05141	M+Na [1+]	Estriol
311.162	0.733165	0.0292157	C05301	M+Na [1+]	2-Hydroxyestradiol
313.215	0.831708	0.0915038	C04295	M+Na [1+]	5-Androstenediol
313.215	0.831708	0.0915038	C04373	M+Na [1+]	Etiocholanolone
313.215	0.831708	0.0915038	C00523	M+Na [1+]	Androsterone
313.215	0.831708	0.0915038	C03917	M+Na [1+]	Dihydrotestosterone
313.215	0.831708	0.0915038	C05293	M+Na [1+]	5b-Dihydrotestosterone
315.121	0.205377	0.611434	C00921	M+H [1+]	7,8-Dihydropteroic acid
315.229	0.149258	0.779492	C03852	M+Na [1+]	Androstan-3alpha,17beta-diol
319.204	0.0562116	0.995183	C01595	M+K [1+]	Linoleic acid
319.224	0.0944686	0.996504	C14825	M+Na [1+]	9,10-Epoxyoctadecenoic acid
319.224	0.0944686	0.996504	C14826	M+Na [1+]	12,13-EpOME
321.218	0.670926	0.730158	C00712	M+K [1+]	Oleic acid
323.162	0.787689	0.188786	C05299	M+Na [1+]	2-Methoxyestrone
323.162	0.787689	0.188786	C05297	M+Na [1+]	19-Oxoandrost-4-ene-3,17-dione
323.162	0.787689	0.188786	C05285	M+Na [1+]	Adrenosterone
323.199	0.590077	0.115901	C00777	M+Na [1+]	All-trans-retinoic acid
323.199	0.590077	0.115901	C15493	M+Na [1+]	9-cis-Retinoic acid
325.179	0.641295	0.0217316	C20265	M+H [1+]	2,3-Epoxymenaquinone
325.179	0.641295	0.0217316	C05284	M+Na [1+]	11b-Hydroxyandrost-4-ene-3,17-dione
325.179	0.641295	0.0217316	C05302	M+Na [1+]	2-Methoxyestradiol
325.179	0.641295	0.0217316	C05290	M+Na [1+]	19-Hydroxyandrost-4-ene-3,17-dione
325.179	0.641295	0.0217316	C05295	M+Na [1+]	19-Oxotestosterone
325.179	0.641295	0.0217316	C05140	M+Na [1+]	16a-Hydroxyandrost-4-ene-3,17-dione
325.213	0.456135	0.333865	C06428	M+Na [1+]	Eicosapentaenoic acid
326.212	1.33057	0.325287	C16662	M+H [1+]	L-alpha-Acetyl-N,N-dinormethadol
327.192	0.464173	0.444066	C05139	M+Na [1+]	16a-Hydroxydehydroisoandrosterone
327.192	0.464173	0.444066	C05294	M+Na [1+]	19-Hydroxytestosterone
327.192	0.464173	0.444066	C18075	M+Na [1+]	11-Hydroxytestosterone
327.192	0.464173	0.444066	C18045	M+Na [1+]	7a-Hydroxydehydroepiandrosterone
327.229	-0.0394154	0.997401	C00219	M+Na [1+]	Arachidonic acid
333.181	0.303338	0.887635	C05819	M+Na [1+]	Menaquinol
335.197	1.12209	0.314904	C14825	M+K [1+]	9,10-Epoxyoctadecenoic acid
335.197	1.12209	0.314904	C14826	M+K [1+]	12,13-EpOME
335.218	-0.00434175	0.999997	C04717	M+Na [1+]	13-L-Hydroperoxylinoleic acid
335.291	-0.643811	0.0898359	C06425	M+Na [1+]	Arachidic acid
337.101	-0.197345	0.826804	C00921	M+Na [1+]	7,8-Dihydropteroic acid
339.193	1.27505	0.0200704	C16677	M+Na [1+]	4-Hydroxyretinoic acid
339.193	1.27505	0.0200704	C16679	M+Na [1+]	all-trans-18-Hydroxyretinoic acid
339.193	1.27505	0.0200704	C16680	M+Na [1+]	all-trans-5,6-Epoxyretinoic acid
341.188	0.966602	0.124616	C06428	M+K [1+]	Eicosapentaenoic acid
343.204	0.406395	0.325248	C00219	M+K [1+]	Arachidonic acid
347.163	-0.125206	0.855587	C20265	M+Na [1+]	2,3-Epoxymenaquinone
353.207	1.14911	0.261985	C03205	M+Na [1+]	Deoxycorticosterone
353.207	1.14911	0.261985	C01176	M+Na [1+]	17-Hydroxyprogesterone
355.223	0.966159	0.166348	C05485	M+Na [1+]	21-Hydroxypregnenolone
355.223	0.966159	0.166348	C05138	M+Na [1+]	17a-Hydroxypregnenolone
355.223	0.966159	0.166348	C18040	M+Na [1+]	5alpha-Dihydrodeoxycorticosterone
355.223	0.966159	0.166348	C18038	M+Na [1+]	7alpha-Hydroxypregnenolone
355.223	0.966159	0.166348	C04518	M+Na [1+]	17-alpha,20-alpha-Dihydroxypregn-4-en-3-one
357.184	0.184151	0.953344	C00909	M+K [1+]	Leukotriene A4
357.239	0.788707	0.0172951	C13713	M+Na [1+]	Tetrahydrodeoxycorticosterone
361.019	0.0983056	0.992816	C00364	M+K [1+]	5-Thymidylic acid
363.265	0.270035	0.84981	G00092	M+K [1+]	NA
364.289	-0.564252	0.705325	G00146	M+Na [1+]	(GlcN)1 (Ino(acyl)-P)1 (Man)1
365.033	0.37404	0.340136	C04646	M+H [1+]	Thioinosinic acid
365.106	2.44196	0.582114	C00089	M+Na [1+]	Sucrose
365.106	2.44196	0.582114	C05402	M+Na [1+]	Melibiose
365.106	2.44196	0.582114	C05400	M+Na [1+]	Isomaltose
365.106	2.44196	0.582114	C01235	M+Na [1+]	Beta-Cortol
365.106	2.44196	0.582114	C00243	M+Na [1+]	Alpha-Lactose
365.106	2.44196	0.582114	C00185	M+Na [1+]	1-beta-D-Glucopyranosyl-4-D-glucopyranose
365.106	2.44196	0.582114	C01083	M+Na [1+]	Trehalose
365.106	2.44196	0.582114	C00208	M+Na [1+]	D-Maltose
365.106	2.44196	0.582114	C00252	M+Na [1+]	Isomaltose
367.205	0.138251	0.970101	C06429	M+K [1+]	Docosahexaenoic acid
374.213	0.345202	0.999806	C16549	M+H [1+]	alpha-Hydroxy-N-desmethyltamoxifen
374.213	0.345202	0.999806	C16547	M+H [1+]	Endoxifen
375.194	0.25598	0.587372	C14781	M+K [1+]	15H-11,12-EETA
375.194	0.25598	0.587372	C14813	M+K [1+]	11H-14,15-EETA
375.194	0.25598	0.587372	C05966	M+K [1+]	15(S)-HPETE
375.194	0.25598	0.587372	C05356	M+K [1+]	5(S)-Hydroperoxyeicosatetraenoic acid
375.194	0.25598	0.587372	C02165	M+K [1+]	Leukotriene B4
375.194	0.25598	0.587372	C14823	M+K [1+]	8(S)-HPETE
375.194	0.25598	0.587372	C14812	M+K [1+]	12(R)-HPETE
375.194	0.25598	0.587372	C05965	M+K [1+]	12(S)-HPETE
377.208	0.457634	0.116894	C14772	M+K [1+]	5,6-DHET
377.208	0.457634	0.116894	C14773	M+K [1+]	8,9-DiHETrE
377.208	0.457634	0.116894	C14774	M+K [1+]	11,12-DiHETrE
377.208	0.457634	0.116894	C14775	M+K [1+]	14,15-DiHETrE
377.231	-0.188562	0.984188	C14782	M+Na [1+]	11,12,15-THETA
377.231	-0.188562	0.984188	C14814	M+Na [1+]	11,14,15-THETA
377.231	-0.188562	0.984188	C05959	M+Na [1+]	11b-PGF2a
377.231	-0.188562	0.984188	C00639	M+Na [1+]	Prostaglandin F2a
379.12	0.251845	0.85307	C16607	M+K [1+]	Citalopram N-oxide
380.112	0.258912	0.331007	C03451	M+H [1+]	S-Lactoylglutathione
381.079	4.56862	0.470395	C00089	M+K [1+]	Sucrose
381.079	4.56862	0.470395	C05402	M+K [1+]	Melibiose
381.079	4.56862	0.470395	C05400	M+K [1+]	Isomaltose
381.079	4.56862	0.470395	C01235	M+K [1+]	Beta-Cortol
381.079	4.56862	0.470395	C00243	M+K [1+]	Alpha-Lactose
381.079	4.56862	0.470395	C00185	M+K [1+]	1-beta-D-Glucopyranosyl-4-D-glucopyranose
381.079	4.56862	0.470395	C01083	M+K [1+]	Trehalose
381.079	4.56862	0.470395	C00208	M+K [1+]	D-Maltose
381.079	4.56862	0.470395	C00252	M+K [1+]	Isomaltose
383.183	-0.104332	0.975098	C01780	M+Na [1+]	Aldosterone
383.183	-0.104332	0.975098	C00762	M+Na [1+]	Cortisone
385.13	-10.0659	0.452524	C00021	M+H [1+]	S-Adenosylhomocysteine
387.213	0.594592	0.465664	C05489	M+Na [1+]	11b,17a,21-Trihydroxypreg-nenolone
387.213	0.594592	0.465664	C05473	M+Na [1+]	11b,21-Dihydroxy-3,20-oxo-5b-pregnan-18-al
387.213	0.594592	0.465664	C05471	M+Na [1+]	Dihydrocortisol
387.213	0.594592	0.465664	C05474	M+Na [1+]	3a,11b,21-Trihydroxy-20-oxo-5b-pregnan-18-al
387.213	0.594592	0.465664	C05470	M+Na [1+]	Tetrahydrocortisone
389.229	0.402344	0.488203	C05472	M+Na [1+]	Tetrahydrocortisol
391.208	0.494787	0.545383	C05956	M+Na [1+]	Prostaglandin G2
399.155	0.518263	0.191595	C01780	M+K [1+]	Aldosterone
399.155	0.518263	0.191595	C00762	M+K [1+]	Cortisone
400.34	0.381852	0.712035	C02990	M+H [1+]	L-Palmitoylcarnitine
402.095	0.158948	0.984538	C03451	M+Na [1+]	S-Lactoylglutathione
402.237	0.971436	0.998466	C06124	M+Na [1+]	Sphingosine 1-phosphate
404.024	-0.222425	0.841373	C00112	M+H [1+]	CDP
404.253	0.796206	0.316166	C01120	M+Na [1+]	Sphinganine 1-phosphate
405.314	1.67607	0.998558	C05107	M+Na [1+]	7-Dehydrodesmosterol
405.314	1.67607	0.998558	C22136	M+Na [1+]	Zymosterone
407.183	1.10485	0.283839	C05956	M+K [1+]	Prostaglandin G2
407.328	-1.01262	0.0445547	C05443	M+Na [1+]	Vitamin D3
407.328	-1.01262	0.0445547	C05437	M+Na [1+]	Zymosterol intermediate 2
407.328	-1.01262	0.0445547	C01164	M+Na [1+]	7-Dehydrocholesterol
407.328	-1.01262	0.0445547	C05439	M+Na [1+]	5a-Cholesta-7,24-dien-3b-ol
407.328	-1.01262	0.0445547	C01802	M+Na [1+]	Desmosterol
409.294	-0.341038	0.341606	C00695	M+H [1+]	Cholic acid
412.061	0.69463	0.308788	C06241	M+Na [1+]	N-Acetylneuraminic acid 9-phosphate
415.282	0.88042	0.0637075	C02528	M+Na [1+]	Chenodeoxycholic acid
418.212	0.0232883	0.99999	C06124	M+K [1+]	Sphingosine 1-phosphate
419.188	-0.0947627	0.955306	C18044	M+Na [1+]	Pregnenolone sulfate
420.228	-0.310768	0.739005	C01120	M+K [1+]	Sphinganine 1-phosphate
421.342	-0.218378	0.907435	C15777	M+Na [1+]	Episterol
421.342	-0.218378	0.907435	C15781	M+Na [1+]	24-Methylenecholesterol
421.342	-0.218378	0.907435	C05103	M+Na [1+]	4a-Methylzymosterol
423.322	0.217158	0.843786	C01561	M+Na [1+]	Calcidiol
423.322	0.217158	0.843786	C05455	M+Na [1+]	7a-Hydroxy-cholestene-3-one
423.358	0.177706	0.946516	C01789	M+Na [1+]	Campesterol
423.358	0.177706	0.946516	C21106	M+Na [1+]	24-epi-Campesterol
425.338	0.12682	0.893445	C15610	M+Na [1+]	Cholest-5-ene-3beta,26-diol
425.338	0.12682	0.893445	C15519	M+Na [1+]	25-Hydroxycholesterol
425.338	0.12682	0.893445	C05451	M+Na [1+]	7a-Hydroxy-5b-cholestan-3-one
425.338	0.12682	0.893445	C03594	M+Na [1+]	7a-Hydroxycholesterol
425.338	0.12682	0.893445	C13550	M+Na [1+]	24-Hydroxycholesterol
425.338	0.12682	0.893445	C05500	M+Na [1+]	20alpha-Hydroxycholesterol
425.338	0.12682	0.893445	C05502	M+Na [1+]	22b-Hydroxycholesterol
435.161	0.934816	0.197255	C18044	M+K [1+]	Pregnenolone sulfate
435.345	-0.172861	0.919072	C01301	M+H [1+]	3a,7a,12a-Trihydroxy-5b-cholestan-26-al
435.345	-0.172861	0.919072	C04554	M+H [1+]	3a,7a-Dihydroxycoprostanic acid
437.32	0.419337	0.519444	C15777	M+K [1+]	Episterol
437.32	0.419337	0.519444	C15781	M+K [1+]	24-Methylenecholesterol
437.32	0.419337	0.519444	C05103	M+K [1+]	4a-Methylzymosterol
437.361	0.182984	0.866311	C05446	M+H [1+]	27-Deoxy-5b-cyprinol
437.375	0.375674	0.649699	C15915	M+Na [1+]	4,4-Dimethyl-5a-cholesta-8-en-3b-ol
437.375	0.375674	0.649699	C01753	M+Na [1+]	Beta-Sitosterol
438.298	1.73566	0.364168	C02990	M+K [1+]	L-Palmitoylcarnitine
441.313	0.310686	0.648852	C15610	M+K [1+]	Cholest-5-ene-3beta,26-diol
441.313	0.310686	0.648852	C15519	M+K [1+]	25-Hydroxycholesterol
441.313	0.310686	0.648852	C05451	M+K [1+]	7a-Hydroxy-5b-cholestan-3-one
441.313	0.310686	0.648852	C03594	M+K [1+]	7a-Hydroxycholesterol
441.313	0.310686	0.648852	C13550	M+K [1+]	24-Hydroxycholesterol
441.313	0.310686	0.648852	C05500	M+K [1+]	20alpha-Hydroxycholesterol
441.313	0.310686	0.648852	C05502	M+K [1+]	22b-Hydroxycholesterol
449.375	-0.883068	0.0226657	C01054	M+Na [1+]	(S)-2,3-Epoxysqualene
449.375	-0.883068	0.0226657	C01724	M+Na [1+]	Lanosterin
451.318	0.846771	0.331145	C22112	M+Na [1+]	4alpha-Carboxy-5alpha-cholesta-8,24-dien-3beta-ol
451.359	0.318747	0.559817	C02059	M+H [1+]	Vitamin K1
453.297	0.952847	0.33376	C17337	M+Na [1+]	7alpha-Hydroxy-3-oxo-4-cholestenoate
453.371	0.214057	0.856733	C03313	M+H [1+]	Reduced Vitamin K (phylloquinone)
455.293	0.33264	0.959708	C01673	M+K [1+]	Calcitriol
455.293	0.33264	0.959708	C07712	M+K [1+]	24R,25-Dihydroxyvitamin D3
455.293	0.33264	0.959708	C17339	M+K [1+]	4-Cholesten-7alpha,12alpha-diol-3-one
455.293	0.33264	0.959708	C17333	M+K [1+]	3 beta-Hydroxy-5-cholestenoate
455.293	0.33264	0.959708	C17336	M+K [1+]	7 alpha,26-Dihydroxy-4-cholesten-3-one
455.293	0.33264	0.959708	C17332	M+K [1+]	7alpha,25-Dihydroxy-4-cholesten-3-one
455.293	0.33264	0.959708	C17331	M+K [1+]	7 alpha,24-Dihydroxy-4-cholesten-3-one
455.313	-0.0912506	0.975895	C18231	M+Na [1+]	24-Hydroxycalcitriol
455.313	-0.0912506	0.975895	C17335	M+Na [1+]	3beta,7alpha-Dihydroxy-5-cholestenoate
457.306	0.376905	0.499593	C05453	M+K [1+]	7a,12a-Dihydroxy-5b-cholestan-3-one
457.306	0.376905	0.499593	C06341	M+K [1+]	7-a,27-Dihydroxycholesterol
457.306	0.376905	0.499593	C15520	M+K [1+]	7-a,25-Dihydroxycholesterol
457.306	0.376905	0.499593	C05445	M+K [1+]	3a,7a-Dihydroxy-5b-cholestan-26-al
457.306	0.376905	0.499593	C15518	M+K [1+]	7alpha,24S-Dihydroxycholesterol
457.306	0.376905	0.499593	C05501	M+K [1+]	20a,22b-Dihydroxycholesterol
457.306	0.376905	0.499593	C05499	M+K [1+]	17alpha,20alpha-Dihydroxycholesterol
457.327	0.208587	0.957758	C01301	M+Na [1+]	3a,7a,12a-Trihydroxy-5b-cholestan-26-al
457.327	0.208587	0.957758	C04554	M+Na [1+]	3a,7a-Dihydroxycoprostanic acid
465.21	0.669362	0.23372	C05504	M+H [1+]	Estriol-16-Glucuronide
465.334	0.930307	0.0624492	C15808	M+Na [1+]	4a-Carboxy-4b-methyl-5a-cholesta-8,24-dien-3b-ol
467.263	0.400193	0.431192	C11136	M+H [1+]	Etiocholanolone glucuronide
467.263	0.400193	0.431192	C11135	M+H [1+]	Androsterone glucuronide
467.353	0.48778	0.415732	C05849	M+H [1+]	Vitamin K1 2,3-epoxide
471.286	0.343728	0.657121	C18231	M+K [1+]	24-Hydroxycalcitriol
471.286	0.343728	0.657121	C17335	M+K [1+]	3beta,7alpha-Dihydroxy-5-cholestenoate
473.302	0.470729	0.70127	C01301	M+K [1+]	3a,7a,12a-Trihydroxy-5b-cholestan-26-al
473.302	0.470729	0.70127	C04554	M+K [1+]	3a,7a-Dihydroxycoprostanic acid
479.227	1.99583	0.259043	C11131	M+H [1+]	2-Methoxy-estradiol-17b 3-glucuronide
487.231	0.504899	0.827468	C11134	M+Na [1+]	Testosterone glucuronide
489.3	0.311308	0.910184	C18043	M+Na [1+]	Cholesterol sulfate
503.17	0.152405	0.996491	C05504	M+K [1+]	Estriol-16-Glucuronide
505.276	0.962264	0.701518	C18043	M+K [1+]	Cholesterol sulfate
515.205	0.149708	0.989411	C11061	M+K [1+]	Retinoyl b-glucuronide
516.364	1.03689	0.30902	G09660	M+K [1+]	(GlcA)1 (GlcNAc)1 (S)1
516.364	1.03689	0.30902	G00872	M+K [1+]	DWA-2
527.159	1.54356	0.00699571	C05404	M+Na [1+]	D-Gal alpha 1->6D-Gal alpha 1->6D-Glucose
527.159	1.54356	0.00699571	C00492	M+Na [1+]	Raffinose
527.159	1.54356	0.00699571	C00721	M+Na [1+]	Dextrin
528	-1.79436	0.124673	C03028	M+Na [1+]	Thiamine triphosphate
543.132	1.98528	0.00373889	C05404	M+K [1+]	D-Gal alpha 1->6D-Gal alpha 1->6D-Glucose
543.132	1.98528	0.00373889	C00492	M+K [1+]	Raffinose
543.132	1.98528	0.00373889	C00721	M+K [1+]	Dextrin
569.312	3.07976	0.186256	C01079	M+H [1+]	Protoporphyrinogen IX
583.255	2.67958	0.181815	C00500	M+H [1+]	Biliverdin
605.239	0.0960998	0.990392	C00500	M+Na [1+]	Biliverdin
609.308	0.191883	0.777406	C03428	M+Na [1+]	Presqualene diphosphate
699.281	0.750279	0.0726033	C03263	M+K [1+]	Coproporphyrinogen III
699.281	0.750279	0.0726033	C05768	M+K [1+]	Coproporphyrinogen I
719.56	-1.2547	0.997294	G13043	M+K [1+]	(GalNAc)2 (GlcA)1 (S)1
779.07	-0.374387	0.616525	C06197	M+Na [1+]	Diadenosine triphosphate
799.679	2.65801	0.919834	C01829	M+Na [1+]	Thyroxine
815.652	3.99405	0.481178	C01829	M+K [1+]	Thyroxine
917.685	3.05945	0.863031	G13037	M+Na [1+]	(GlcA)2 (GlcN)1 (GlcNAc)1 (S)2
71.0131	-0.207015	0.29734	C00577	M-H2O-H [1-]	D-Glyceraldehyde
71.0131	-0.207015	0.29734	C01013	M-H2O-H [1-]	Hydroxypropionic acid
71.0131	-0.207015	0.29734	C00184	M-H2O-H [1-]	Dihydroxyacetone
71.0131	-0.207015	0.29734	C00256	M-H2O-H [1-]	D-Lactic acid
74.0017	-1.68961	0.00649301	C00160	M-H [1-]	Glycolate
78.9493	6.70828	0.0153301	C00059	M-H2O-H [1-]	Sulfate
85.0289	-0.0175453	0.999533	C01089	M-H2O-H [1-]	(R)-3-Hydroxybutyric acid
85.0289	-0.0175453	0.999533	C06001	M-H2O-H [1-]	(S)-3-Hydroxyisobutyric acid
85.0289	-0.0175453	0.999533	C05984	M-H2O-H [1-]	2-Hydroxybutyric acid
92.9749	-1.68798	0.00231747	C06754	M-H+O [1-]	Chloroacetaldehyde
96.9198	1.94455	0.665217	C01528	M-H+O [1-]	Hydrogen selenide
99.0082	1.17911	0.000867489	C00042	M-H2O-H [1-]	Succinic acid
99.0082	1.17911	0.000867489	C02170	M-H2O-H [1-]	Methylmalonic acid
99.0814	1.21443	0.0671287	C02373	M-H [1-]	3a,7b,12a-Trihydroxy-5a-Cholanoic acid
105.02	-0.289287	0.930815	C00258	M-H [1-]	Glyceric acid
105.02	-0.289287	0.930815	C00577	M-H+O [1-]	D-Glyceraldehyde
105.02	-0.289287	0.930815	C01013	M-H+O [1-]	Hydroxypropionic acid
105.02	-0.289287	0.930815	C00184	M-H+O [1-]	Dihydroxyacetone
105.02	-0.289287	0.930815	C00256	M-H+O [1-]	D-Lactic acid
107.035	4.4643	0.0598009	C00116	M-H+O [1-]	Glycerol
108.045	1.13483	0.0662699	C00450	M-H2O-H [1-]	(S)-2,3,4,5-Tetrahydropiperidine-2-carboxylate
112.041	1.61956	0.144726	C03564	M-H [1-]	1-Pyrroline-2-carboxylic acid
112.051	5.14867	0.0507523	C00300	M-H2O-H [1-]	Creatine
114.056	2.55803	0.88198	C00763	M-H [1-]	D-Proline
114.056	2.55803	0.88198	C00148	M-H [1-]	L-Proline
115.003	1.03375	0.114962	C00149	M-H2O-H [1-]	L-Malic acid
116.071	3.07737	0.16306	C00719	M-H [1-]	Betaine
116.071	3.07737	0.16306	C00183	M-H [1-]	L-Valine
117.02	1.14277	0.0310065	C00262	M-H2O-H [1-]	Hypoxanthine
122.024	1.39248	0.813906	C03824	M-H2O-H [1-]	2-Aminomuconic acid semialdehyde
128.035	1.02007	0.00212922	C00025	M-H2O-H [1-]	L-Glutamic acid
128.035	1.02007	0.00212922	C05938	M-H2O-H [1-]	L-4-Hydroxyglutamate semialdehyde
128.035	1.02007	0.00212922	C04281	M-H [1-]	Pyrroline hydroxycarboxylic acid
128.035	1.02007	0.00212922	C03564	M-H+O [1-]	1-Pyrroline-2-carboxylic acid
128.035	1.02007	0.00212922	C04282	M-H [1-]	1-Pyrroline-4-hydroxy-2-carboxylate
128.035	1.02007	0.00212922	C00217	M-H2O-H [1-]	D-Glutamic acid
128.035	1.02007	0.00212922	C02237	M-H [1-]	Pyrrolidonecarboxylic acid
128.035	1.02007	0.00212922	C01879	M-H [1-]	Pyroglutamic acid
129.018	0.784516	0.00752129	C02266	M-H2O-H [1-]	D-Xylono-1,5-lactone
129.018	0.784516	0.00752129	C02630	M-H2O-H [1-]	2-Hydroxyglutarate
129.055	0.760501	0.00303364	C00418	M-H2O-H [1-]	Mevalonic acid
130.05	1.29928	0.0497923	C00430	M-H [1-]	5-Aminolevulinic acid
130.05	1.29928	0.0497923	C05147	M-H [1-]	Trans-3-hydroxy-L-proline
130.05	1.29928	0.0497923	C00763	M-H+O [1-]	D-Proline
130.05	1.29928	0.0497923	C01157	M-H [1-]	4-Hydroxyproline
130.05	1.29928	0.0497923	C00148	M-H+O [1-]	L-Proline
130.05	1.29928	0.0497923	C03440	M-H [1-]	cis-4-Hydroxy-D-proline
130.05	1.29928	0.0497923	C01165	M-H [1-]	L-Glutamic gamma-semialdehyde
130.05	1.29928	0.0497923	C01110	M-H [1-]	5-Amino-2-oxopentanoic acid
131.046	1.78189	0.646539	C02642	M-H [1-]	Ureidopropionic acid
131.046	1.78189	0.646539	C00152	M-H [1-]	L-Asparagine
131.046	1.78189	0.646539	C16622	M-H+O [1-]	N,N'-Diacetylhydrazine
133.051	0.962147	0.522728	C01801	M-H [1-]	Deoxyribose
134.047	2.57543	0.00333405	C00147	M-H [1-]	Adenine
134.061	2.81159	0.6538	C03758	M-H2O-H [1-]	Dopamine
136.04	2.82471	3.32387e-05	C00108	M-H [1-]	2-Aminobenzoic acid
136.991	-1.73933	0.839143	C05823	M-H+O [1-]	3-Mercaptolactic acid
142.015	-0.230181	0.985291	C01044	M-H2O-H [1-]	N-Formyl-L-aspartate
142.029	0.87593	0.159404	C05639	M-H2O-H [1-]	4,6-Dihydroxyquinoline
142.029	0.87593	0.159404	C05637	M-H2O-H [1-]	Quinoline-4,8-diol
142.051	0.504633	0.953723	C00956	M-H2O-H [1-]	Aminoadipic acid
142.051	0.504633	0.953723	C00450	M-H+O [1-]	(S)-2,3,4,5-Tetrahydropiperidine-2-carboxylate
142.998	2.4014	0.0298748	C05946	M-H2O-H [1-]	D-4-Hydroxy-2-oxoglutarate
142.998	2.4014	0.0298748	C01127	M-H2O-H [1-]	4-Hydroxy-2-oxoglutaric acid
143.034	0.276708	0.640979	C03827	M-H2O-H [1-]	2-Dehydro-3-deoxy-L-fuconate
143.107	1.39503	0.347472	C06423	M-H [1-]	Caprylic acid
144.03	0.922498	0.98119	C00940	M-H [1-]	2-Keto-glutaramic acid
144.03	0.922498	0.98119	C05947	M-H2O-H [1-]	L-erythro-4-Hydroxyglutamate
144.03	0.922498	0.98119	C04281	M-H+O [1-]	Pyrroline hydroxycarboxylic acid
144.03	0.922498	0.98119	C04282	M-H+O [1-]	1-Pyrroline-4-hydroxy-2-carboxylate
144.03	0.922498	0.98119	C02237	M-H+O [1-]	Pyrrolidonecarboxylic acid
144.03	0.922498	0.98119	C01879	M-H+O [1-]	Pyroglutamic acid
145.049	0.75377	0.0866245	C01019	M-H2O-H [1-]	L-Fucose
145.098	1.12225	0.783042	C00047	M-H [1-]	L-Lysine
145.098	1.12225	0.783042	C02714	M-H+O [1-]	N-Acetylputrescine
147.03	2.48668	0.472168	C02266	M-H [1-]	D-Xylono-1,5-lactone
147.03	2.48668	0.472168	C16358	M-H2O-H [1-]	1-Methylxanthine
147.03	2.48668	0.472168	C16353	M-H2O-H [1-]	7-Methylxanthine
147.03	2.48668	0.472168	C02630	M-H [1-]	2-Hydroxyglutarate
149.046	1.51672	0.304568	C01801	M-H+O [1-]	Deoxyribose
149.046	1.51672	0.304568	C00121	M-H [1-]	D-Ribose
149.046	1.51672	0.304568	C00310	M-H [1-]	D-Xylulose
149.046	1.51672	0.304568	C00181	M-H [1-]	D-Xylose
149.046	1.51672	0.304568	C00259	M-H [1-]	L-Arabinose
149.046	1.51672	0.304568	C00312	M-H [1-]	L-Threo-2-pentulose
149.06	0.847982	0.0667738	C06459	M-H2O-H [1-]	Phosphorylcholine
150.056	0.936651	0.920164	C00547	M-H2O-H [1-]	Norepinephrine
150.056	0.936651	0.920164	C00314	M-H2O-H [1-]	Pyridoxine
150.97	2.56497	0.0323156	C11537	M-H2O-H [1-]	(2R)-3-Sulfolactate
150.97	2.56497	0.0323156	C05527	M-H [1-]	3-Sulfinylpyruvic acid
153.02	1.19293	0.201795	C05585	M-H+O [1-]	Gentisate aldehyde
153.02	1.19293	0.201795	C00628	M-H [1-]	Gentisic acid
154.062	2.56464	0.000267869	C00135	M-H [1-]	L-Histidine
154.062	2.56464	0.000267869	C03771	M-H2O-H [1-]	2-Oxoarginine
157.014	2.27666	0.190646	C02670	M-H2O-H [1-]	D-Glucurono-6,3-lactone
159.029	0.656708	0.761393	C00198	M-H2O-H [1-]	Gluconolactone
159.029	0.656708	0.761393	C01040	M-H2O-H [1-]	L-Gulonolactone
159.102	1.43844	0.0944454	C06423	M-H+O [1-]	Caprylic acid
159.102	1.43844	0.0944454	C16651	M-H [1-]	3-Hydroxyvalproic acid
161.024	0.580892	0.474743	C01179	M-H2O-H [1-]	4-Hydroxyphenylpyruvic acid
161.024	0.580892	0.474743	C05350	M-H2O-H [1-]	2-Hydroxy-3-(4-hydroxyphenyl)propenoic acid
161.061	3.94036	0.614538	C06205	M-H [1-]	1,2-Dihydronaphthalene-1,2-diol
163.04	0.50363	0.347469	C05583	M-H2O-H [1-]	3-Methoxy-4-hydroxyphenylglycolaldehyde
163.04	0.50363	0.347469	C05582	M-H2O-H [1-]	Homovanillic acid
163.04	0.50363	0.347469	C00166	M-H [1-]	Phenylpyruvic acid
163.04	0.50363	0.347469	C02763	M-H [1-]	Enol-phenylpyruvate
163.061	-2.84893	5.42921e-12	C00794	M-H2O-H [1-]	Sorbitol
163.061	-2.84893	5.42921e-12	C01019	M-H [1-]	L-Fucose
163.061	-2.84893	5.42921e-12	C01697	M-H2O-H [1-]	Galactitol
163.061	-2.84893	5.42921e-12	C00418	M-H+O [1-]	Mevalonic acid
163.962	0.656113	0.799785	C05689	M-H2O-H [1-]	Se-Methylselenocysteine
163.962	0.656113	0.799785	C05698	M-H2O-H [1-]	Selenohomocysteine
164.035	1.5211	0.00904311	C05578	M-H+O [1-]	5,6-Dihydroxyindole
164.035	1.5211	0.00904311	C05653	M-H [1-]	Formylanthranilic acid
164.035	1.5211	0.00904311	C00847	M-H2O-H [1-]	4-Pyridoxic acid
165.04	1.57862	0.000462597	C00121	M-H+O [1-]	D-Ribose
165.04	1.57862	0.000462597	C00310	M-H+O [1-]	D-Xylulose
165.04	1.57862	0.000462597	C00181	M-H+O [1-]	D-Xylose
165.04	1.57862	0.000462597	C00259	M-H+O [1-]	L-Arabinose
165.04	1.57862	0.000462597	C00312	M-H+O [1-]	L-Threo-2-pentulose
165.055	0.333387	0.682678	C05594	M-H2O-H [1-]	Vanylglycol
165.055	0.333387	0.682678	C00588	M-H2O-H [1-]	Phosphorylcholine
167.036	1.15826	0.0503879	C00544	M-H [1-]	Homogentisic acid
167.036	1.15826	0.0503879	C05577	M-H [1-]	3,4-Dihydroxymandelaldehyde
167.036	1.15826	0.0503879	C04043	M-H+O [1-]	3,4-Dihydroxyphenylacetaldehyde
167.036	1.15826	0.0503879	C01161	M-H [1-]	3,4-Dihydroxybenzeneacetic acid
167.036	1.15826	0.0503879	C00642	M-H+O [1-]	p-Hydroxyphenylacetic acid
167.036	1.15826	0.0503879	C05852	M-H+O [1-]	Ortho-Hydroxyphenylacetic acid
167.997	1.05086	0.542344	C00506	M-H [1-]	Cysteic acid
167.997	1.05086	0.542344	C00606	M-H+O [1-]	3-Sulfinoalanine
169.051	0.862681	0.370005	C05576	M-H [1-]	3,4-Dihydroxyphenylglycol
170.971	-0.212953	0.968279	C00988	M-H+O [1-]	Phosphoglycolic acid
171.139	-0.20309	0.77174	C01571	M-H [1-]	Capric acid
173.008	1.02443	0.0209345	C00311	M-H2O-H [1-]	Isocitric acid
173.008	1.02443	0.0209345	C00158	M-H2O-H [1-]	Citric acid
175.026	1.65297	0.173884	C02670	M-H [1-]	D-Glucurono-6,3-lactone
175.026	1.65297	0.173884	C00322	M-H+O [1-]	Oxoadipic acid
175.062	0.20325	0.990458	C07481	M-H2O-H [1-]	Caffeine
178.051	2.02341	0.441814	C00355	M-H2O-H [1-]	L-Dopa
178.051	2.02341	0.441814	C01586	M-H [1-]	Hippuric acid
179.056	2.46914	0.0155147	C00221	M-H [1-]	D-Glucose
179.056	2.46914	0.0155147	C00267	M-H [1-]	Alpha-D-Glucose
179.056	2.46914	0.0155147	C00095	M-H [1-]	D-Fructose
179.056	2.46914	0.0155147	C00159	M-H [1-]	D-Mannose
179.056	2.46914	0.0155147	C01019	M-H+O [1-]	L-Fucose
179.056	2.46914	0.0155147	C00124	M-H [1-]	D-Galactose
179.056	2.46914	0.0155147	C00984	M-H [1-]	D-Galactose
179.056	2.46914	0.0155147	C00031	M-H [1-]	D-Glucose
179.056	2.46914	0.0155147	C00137	M-H [1-]	myo-Inositol
179.056	2.46914	0.0155147	C02336	M-H [1-]	D-Fructose
181.037	6.72697	0.343679	C16358	M-H+O [1-]	1-Methylxanthine
181.037	6.72697	0.343679	C16353	M-H+O [1-]	7-Methylxanthine
181.037	6.72697	0.343679	C16359	M-H [1-]	1-Methyluric acid
181.037	6.72697	0.343679	C16355	M-H [1-]	7-Methyluric acid
181.071	-4.65521	2.30926e-14	C00794	M-H [1-]	Sorbitol
181.071	-4.65521	2.30926e-14	C01697	M-H [1-]	Galactitol
182.01	0.777826	0.991836	C03722	M-H+O [1-]	Quinolinic acid
183.03	-4.41867	0.387113	C00544	M-H+O [1-]	Homogentisic acid
183.03	-4.41867	0.387113	C05580	M-H [1-]	3,4-Dihydroxymandelic acid
183.03	-4.41867	0.387113	C05577	M-H+O [1-]	3,4-Dihydroxymandelaldehyde
183.03	-4.41867	0.387113	C01161	M-H+O [1-]	3,4-Dihydroxybenzeneacetic acid
184.025	-2.85326	0.443259	C04409	M-H [1-]	2-Amino-3-carboxymuconic acid semialdehyde
185.045	1.04571	0.244285	C05576	M-H+O [1-]	3,4-Dihydroxyphenylglycol
187.124	0.643607	0.99982	C16561	M-H2O-H [1-]	Monoethylglycinexylidide
187.134	0.605369	0.0258721	C01571	M-H+O [1-]	Capric acid
189.1	4.04141	0.972934	C00062	M-H+O [1-]	L-Arginine
189.1	4.04141	0.972934	C05933	M-H [1-]	N-(o)-Hydroxyarginine
189.1	4.04141	0.972934	C00792	M-H+O [1-]	D-Arginine
191.02	-6.74934	2.80616e-08	C00311	M-H [1-]	Isocitric acid
191.02	-6.74934	2.80616e-08	C00158	M-H [1-]	Citric acid
191.02	-6.74934	2.80616e-08	C02670	M-H+O [1-]	D-Glucurono-6,3-lactone
191.02	-6.74934	2.80616e-08	C00818	M-H2O-H [1-]	Glucaric acid
192.067	0.542964	0.727322	C16595	M-H [1-]	4-Hydroxy-5-phenyltetrahydro-1,3-oxazin-2-one
192.067	0.542964	0.727322	C16587	M-H [1-]	3-Carbamoyl-2-phenylpropionaldehyde
194.082	0.997556	0.143182	C16586	M-H [1-]	2-Phenyl-1,3-propanediol monocarbamate
194.97	1.0786	0.945801	C06054	M-H2O-H [1-]	2-Oxo-3-hydroxy-4-phosphobutanoic acid
195.053	0.345252	0.97899	C13747	M-H+O [1-]	Paraxanthine
195.053	0.345252	0.97899	C07480	M-H+O [1-]	Theobromine
195.053	0.345252	0.97899	C16360	M-H [1-]	3,7-Dimethyluric acid
195.053	0.345252	0.97899	C16356	M-H [1-]	1,7-Dimethyluric acid
196.936	0.452499	0.687034	C18904	M-H+O [1-]	Methylselenopyruvate
199.024	3.95871	0.0139035	C05580	M-H+O [1-]	3,4-Dihydroxymandelic acid
199.024	3.95871	0.0139035	C01036	M-H [1-]	Maleylacetoacetic acid
200.02	0.653453	0.81206	C04409	M-H+O [1-]	2-Amino-3-carboxymuconic acid semialdehyde
200.981	1.38203	0.980668	C00631	M-H+O [1-]	2-Phospho-D-glyceric acid
200.981	1.38203	0.980668	C00197	M-H+O [1-]	3-Phosphoglyceric acid
207.088	-0.0815702	0.999299	C00386	M-H2O-H [1-]	Carnosine
208.061	1.25637	0.0661037	C16595	M-H+O [1-]	4-Hydroxy-5-phenyltetrahydro-1,3-oxazin-2-one
208.061	1.25637	0.0661037	C16587	M-H+O [1-]	3-Carbamoyl-2-phenylpropionaldehyde
208.061	1.25637	0.0661037	C16591	M-H [1-]	3-Carbamoyl-2-phenylpropionic acid
210.076	0.232113	0.947488	C16586	M-H+O [1-]	2-Phenyl-1,3-propanediol monocarbamate
213.016	2.54696	0.893678	C00672	M-H [1-]	Deoxyribose 1-phosphate
213.016	2.54696	0.893678	C00673	M-H [1-]	Deoxyribose 5-phosphate
213.016	2.54696	0.893678	C01068	M-H2O-H [1-]	D-Ribitol 5-phosphate
214.048	-0.038764	0.997495	C01233	M-H [1-]	Glycerylphosphorylethanolamine
215.165	0.669431	0.419051	C02679	M-H+O [1-]	Dodecanoic acid
218.103	1.91127	0.001619	C00864	M-H [1-]	Pantothenic acid
219.176	-0.240866	0.9012	C03461	M-H [1-]	2-trans,6-trans-Farnesal
221.103	-0.103918	0.99727	C00884	M-H2O-H [1-]	Homocarnosine
221.103	-0.103918	0.99727	C01262	M-H2O-H [1-]	Anserine
227.203	1.17857	1.38729e-06	C06424	M-H [1-]	Myristic acid
231.045	5.1671	0.111703	C00669	M-H2O-H [1-]	gamma-Glutamylcysteine
235.17	1.43711	7.35761e-06	C03461	M-H+O [1-]	2-trans,6-trans-Farnesal
237.186	-0.27012	0.948557	C06081	M-H+O [1-]	Farnesol
239.015	1.58675	0.400158	C00491	M-H [1-]	L-Cystine
241.011	2.43211	0.368137	C05345	M-H2O-H [1-]	Beta-D-Fructose 6-phosphate
241.011	2.43211	0.368137	C00668	M-H2O-H [1-]	Glucose 6-phosphate
241.011	2.43211	0.368137	C00103	M-H2O-H [1-]	Glucose 1-phosphate
241.011	2.43211	0.368137	C01172	M-H2O-H [1-]	Beta-D-Glucose 6-phosphate
241.011	2.43211	0.368137	C00275	M-H2O-H [1-]	Mannose 6-phosphate
241.011	2.43211	0.368137	C00636	M-H2O-H [1-]	D-Mannose 1-phosphate
241.011	2.43211	0.368137	C01094	M-H2O-H [1-]	3a,6b,7a,12a-Tetrahydroxy-5b-cholanoic acid
241.011	2.43211	0.368137	C01097	M-H2O-H [1-]	D-Tagatose 6-phosphate
241.011	2.43211	0.368137	C00446	M-H2O-H [1-]	Galactose 1-phosphate
241.011	2.43211	0.368137	C00092	M-H2O-H [1-]	Glucose 6-phosphate
241.011	2.43211	0.368137	C00085	M-H2O-H [1-]	Fructose 6-phosphate
241.011	2.43211	0.368137	C03862	M-H2O-H [1-]	Dolichyl phosphate D-mannose
241.011	2.43211	0.368137	C03546	M-H2O-H [1-]	D-Myo-inositol 4-phosphate
241.011	2.43211	0.368137	C04006	M-H2O-H [1-]	1D-myo-Inositol 3-phosphate
241.011	2.43211	0.368137	C01177	M-H2O-H [1-]	Myo-inositol 1-phosphate
241.094	-0.303891	0.925515	C00386	M-H+O [1-]	Carnosine
243.063	3.97534	5.43317e-06	C00299	M-H [1-]	Uridine
243.063	3.97534	5.43317e-06	C00526	M-H+O [1-]	Deoxyuridine
243.197	0.766547	0.658621	C06424	M-H+O [1-]	Myristic acid
253.082	1.46679	0.892731	C16584	M-H [1-]	p-Hydroxyfelbamate
253.082	1.46679	0.892731	C16582	M-H [1-]	2-Hydroxyfelbamate
253.092	6.55181	0.0157988	C05401	M-H [1-]	Galactosylglycerol
258.074	5.2254	0.335523	C00475	M-H+O [1-]	Cytidine
263.105	-0.0803546	0.999751	C05642	M-H [1-]	Acetyl-N-formyl-5-methoxykynurenamine
263.105	-0.0803546	0.999751	C05643	M-H+O [1-]	6-Hydroxymelatonin
267.074	2.19133	0.000540691	C05512	M-H+O [1-]	Deoxyinosine
267.074	2.19133	0.000540691	C00294	M-H [1-]	Inosine
271.229	0.936267	0.0787129	C00249	M-H+O [1-]	Palmitic acid
275.2	3.04309	0.226593	C16300	M-H [1-]	Stearidonic acid
276.084	-0.132952	0.999984	C16612	M-H2O-H [1-]	Citalopram aldehyde
277.216	2.44131	0.0148557	C14825	M-H2O-H [1-]	9,10-Epoxyoctadecenoic acid
277.216	2.44131	0.0148557	C14826	M-H2O-H [1-]	12,13-EpOME
279.233	1.51968	0.000752704	C01595	M-H [1-]	Linoleic acid
281.248	1.59895	0.00250483	C00712	M-H [1-]	Oleic acid
282.28	-2.69921	0.82983	C00836	M-H2O-H [1-]	Sphinganine
285.223	1.98281	0.00514152	C00219	M-H2O-H [1-]	Arachidonic acid
285.223	1.98281	0.00514152	C00473	M-H [1-]	Retinol
285.223	1.98281	0.00514152	C16682	M-H [1-]	9-cis-Retinol
285.223	1.98281	0.00514152	C00899	M-H [1-]	11-cis-Retinol
291.197	1.83296	0.0816477	C16300	M-H+O [1-]	Stearidonic acid
293.212	2.24476	0.0612823	C04717	M-H2O-H [1-]	13-L-Hydroperoxylinoleic acid
293.212	2.24476	0.0612823	C06427	M-H+O [1-]	Alpha-Linolenic acid
293.212	2.24476	0.0612823	C06426	M-H+O [1-]	Gamma-Linolenic acid
295.049	-1.53286	0.583427	C00341	M-H2O-H [1-]	Geranyl 2-methylbutyrate
295.228	1.95383	0.103851	C01595	M-H+O [1-]	Linoleic acid
295.228	1.95383	0.103851	C14825	M-H [1-]	9,10-Epoxyoctadecenoic acid
295.228	1.95383	0.103851	C14826	M-H [1-]	12,13-EpOME
299.202	1.06308	0.150443	C00909	M-H2O-H [1-]	Leukotriene A4
299.202	1.06308	0.150443	C00376	M-H+O [1-]	Retinal
299.202	1.06308	0.150443	C02110	M-H+O [1-]	11-cis-Retinaldehyde
299.202	1.06308	0.150443	C00777	M-H [1-]	All-trans-retinoic acid
299.202	1.06308	0.150443	C16681	M-H+O [1-]	9-cis-Retinal
299.202	1.06308	0.150443	C15493	M-H [1-]	9-cis-Retinoic acid
299.202	1.06308	0.150443	C21797	M-H+O [1-]	Vitamin A2
299.26	1.90107	0.220404	C01530	M-H+O [1-]	Stearic acid
301.217	0.983077	0.0553834	C14768	M-H2O-H [1-]	5,6-Epoxy-8,11,14-eicosatrienoic acid
301.217	0.983077	0.0553834	C14769	M-H2O-H [1-]	8,9-Epoxyeicosatrienoic acid
301.217	0.983077	0.0553834	C14770	M-H2O-H [1-]	11,12-Epoxyeicosatrienoic acid
301.217	0.983077	0.0553834	C14771	M-H2O-H [1-]	14,15-Epoxy-5,8,11-eicosatrienoic acid
301.217	0.983077	0.0553834	C14748	M-H2O-H [1-]	20-Hydroxyeicosatetraenoic acid
301.217	0.983077	0.0553834	C04742	M-H2O-H [1-]	15(S)-HETE
301.217	0.983077	0.0553834	C14749	M-H2O-H [1-]	19(S)-HETE
301.217	0.983077	0.0553834	C04805	M-H2O-H [1-]	5-HETE
301.217	0.983077	0.0553834	C00473	M-H+O [1-]	Retinol
301.217	0.983077	0.0553834	C16682	M-H+O [1-]	9-cis-Retinol
301.217	0.983077	0.0553834	C00899	M-H+O [1-]	11-cis-Retinol
301.217	0.983077	0.0553834	C06428	M-H [1-]	Eicosapentaenoic acid
303.103	-5.9761	2.13152e-07	C04079	M-H2O-H [1-]	D-Pantothenoyl-L-cysteine
303.232	1.30099	0.000370216	C00219	M-H [1-]	Arachidonic acid
303.232	1.30099	0.000370216	C15492	M-H+O [1-]	All-trans-13,14-dihydroretinol
305.213	0.0988611	0.998495	C04295	M-H+O [1-]	5-Androstenediol
305.213	0.0988611	0.998495	C04373	M-H+O [1-]	Etiocholanolone
305.213	0.0988611	0.998495	C00523	M-H+O [1-]	Androsterone
305.213	0.0988611	0.998495	C03917	M-H+O [1-]	Dihydrotestosterone
305.213	0.0988611	0.998495	C05293	M-H+O [1-]	5b-Dihydrotestosterone
306.077	0.957997	0.152698	C00051	M-H [1-]	Glutathione
311.2	3.35145	0.712683	C03205	M-H2O-H [1-]	Deoxycorticosterone
311.2	3.35145	0.712683	C01176	M-H2O-H [1-]	17-Hydroxyprogesterone
311.222	1.96834	0.143613	C14825	M-H+O [1-]	9,10-Epoxyoctadecenoic acid
311.222	1.96834	0.143613	C14826	M-H+O [1-]	12,13-EpOME
311.222	1.96834	0.143613	C04717	M-H [1-]	13-L-Hydroperoxylinoleic acid
317.177	1.79261	0.663106	C05284	M-H+O [1-]	11b-Hydroxyandrost-4-ene-3,17-dione
317.177	1.79261	0.663106	C05302	M-H+O [1-]	2-Methoxyestradiol
317.177	1.79261	0.663106	C05290	M-H+O [1-]	19-Hydroxyandrost-4-ene-3,17-dione
317.177	1.79261	0.663106	C05295	M-H+O [1-]	19-Oxotestosterone
317.177	1.79261	0.663106	C05140	M-H+O [1-]	16a-Hydroxyandrost-4-ene-3,17-dione
317.211	1.88381	0.000563003	C14781	M-H2O-H [1-]	15H-11,12-EETA
317.211	1.88381	0.000563003	C14813	M-H2O-H [1-]	11H-14,15-EETA
317.211	1.88381	0.000563003	C05966	M-H2O-H [1-]	15(S)-HPETE
317.211	1.88381	0.000563003	C05356	M-H2O-H [1-]	5(S)-Hydroperoxyeicosatetraenoic acid
317.211	1.88381	0.000563003	C00909	M-H [1-]	Leukotriene A4
317.211	1.88381	0.000563003	C02165	M-H2O-H [1-]	Leukotriene B4
317.211	1.88381	0.000563003	C14823	M-H2O-H [1-]	8(S)-HPETE
317.211	1.88381	0.000563003	C14812	M-H2O-H [1-]	12(R)-HPETE
317.211	1.88381	0.000563003	C05965	M-H2O-H [1-]	12(S)-HPETE
317.211	1.88381	0.000563003	C06428	M-H+O [1-]	Eicosapentaenoic acid
319.192	3.17485	0.772398	C05139	M-H+O [1-]	16a-Hydroxydehydroisoandrosterone
319.192	3.17485	0.772398	C05294	M-H+O [1-]	19-Hydroxytestosterone
319.192	3.17485	0.772398	C18075	M-H+O [1-]	11-Hydroxytestosterone
319.192	3.17485	0.772398	C18045	M-H+O [1-]	7a-Hydroxydehydroepiandrosterone
319.227	1.33872	0.00528264	C14768	M-H [1-]	5,6-Epoxy-8,11,14-eicosatrienoic acid
319.227	1.33872	0.00528264	C14769	M-H [1-]	8,9-Epoxyeicosatrienoic acid
319.227	1.33872	0.00528264	C14770	M-H [1-]	11,12-Epoxyeicosatrienoic acid
319.227	1.33872	0.00528264	C14771	M-H [1-]	14,15-Epoxy-5,8,11-eicosatrienoic acid
319.227	1.33872	0.00528264	C00219	M-H+O [1-]	Arachidonic acid
319.227	1.33872	0.00528264	C14772	M-H2O-H [1-]	5,6-DHET
319.227	1.33872	0.00528264	C14773	M-H2O-H [1-]	8,9-DiHETrE
319.227	1.33872	0.00528264	C14774	M-H2O-H [1-]	11,12-DiHETrE
319.227	1.33872	0.00528264	C14775	M-H2O-H [1-]	14,15-DiHETrE
319.227	1.33872	0.00528264	C14748	M-H [1-]	20-Hydroxyeicosatetraenoic acid
319.227	1.33872	0.00528264	C04742	M-H [1-]	15(S)-HETE
319.227	1.33872	0.00528264	C14749	M-H [1-]	19(S)-HETE
319.227	1.33872	0.00528264	C04805	M-H [1-]	5-HETE
321.244	2.22079	0.728508	C03242	M-H+O [1-]	8,11,14-Eicosatrienoic acid
322.071	-0.86651	0.491216	C00051	M-H+O [1-]	Glutathione
323.098	-4.68413	0.000111856	C00089	M-H2O-H [1-]	Sucrose
323.098	-4.68413	0.000111856	C05402	M-H2O-H [1-]	Melibiose
323.098	-4.68413	0.000111856	C05400	M-H2O-H [1-]	Isomaltose
323.098	-4.68413	0.000111856	C01235	M-H2O-H [1-]	Beta-Cortol
323.098	-4.68413	0.000111856	C00243	M-H2O-H [1-]	Alpha-Lactose
323.098	-4.68413	0.000111856	C00185	M-H2O-H [1-]	1-beta-D-Glucopyranosyl-4-D-glucopyranose
323.098	-4.68413	0.000111856	C01083	M-H2O-H [1-]	Trehalose
323.098	-4.68413	0.000111856	C00208	M-H2O-H [1-]	D-Maltose
323.098	-4.68413	0.000111856	C00252	M-H2O-H [1-]	Isomaltose
327.219	1.72848	0.539107	C04717	M-H+O [1-]	13-L-Hydroperoxylinoleic acid
327.233	1.09145	0.0396149	C06429	M-H [1-]	Docosahexaenoic acid
327.292	-3.11836	0.442441	C06425	M-H+O [1-]	Arachidic acid
333.059	1.9208	0.0914376	C19562	M-H2O-H [1-]	7-Hydroxymethyl-12-methylbenz[a]anthracene sulfate
333.206	1.89672	0.144331	C00909	M-H+O [1-]	Leukotriene A4
333.206	1.89672	0.144331	C00427	M-H2O-H [1-]	Prostaglandin H2
333.206	1.89672	0.144331	C00696	M-H2O-H [1-]	Prostaglandin D2
333.206	1.89672	0.144331	C00584	M-H2O-H [1-]	Prostaglandin E2
333.206	1.89672	0.144331	C04853	M-H2O-H [1-]	20-Hydroxy-leukotriene B4
333.206	1.89672	0.144331	C01312	M-H2O-H [1-]	Prostaglandin I2
333.206	1.89672	0.144331	C02198	M-H2O-H [1-]	Thromboxane A2
335.221	1.9493	0.0611207	C14782	M-H2O-H [1-]	11,12,15-THETA
335.221	1.9493	0.0611207	C14814	M-H2O-H [1-]	11,14,15-THETA
335.221	1.9493	0.0611207	C05959	M-H2O-H [1-]	11b-PGF2a
335.221	1.9493	0.0611207	C00639	M-H2O-H [1-]	Prostaglandin F2a
337.239	1.68476	0.670375	C14772	M-H [1-]	5,6-DHET
337.239	1.68476	0.670375	C14773	M-H [1-]	8,9-DiHETrE
337.239	1.68476	0.670375	C14774	M-H [1-]	11,12-DiHETrE
337.239	1.68476	0.670375	C14775	M-H [1-]	14,15-DiHETrE
341.11	-0.900146	0.34344	C00089	M-H [1-]	Sucrose
341.11	-0.900146	0.34344	C05402	M-H [1-]	Melibiose
341.11	-0.900146	0.34344	C05400	M-H [1-]	Isomaltose
341.11	-0.900146	0.34344	C01235	M-H [1-]	Beta-Cortol
341.11	-0.900146	0.34344	C00243	M-H [1-]	Alpha-Lactose
341.11	-0.900146	0.34344	C00185	M-H [1-]	1-beta-D-Glucopyranosyl-4-D-glucopyranose
341.11	-0.900146	0.34344	C01083	M-H [1-]	Trehalose
341.11	-0.900146	0.34344	C00208	M-H [1-]	D-Maltose
341.11	-0.900146	0.34344	C00252	M-H [1-]	Isomaltose
343.125	-5.43329	3.34305e-08	C05399	M-H [1-]	Melibiitol
343.191	6.86384	0.461427	C00735	M-H2O-H [1-]	Cortisol
343.191	6.86384	0.461427	C05469	M-H2O-H [1-]	17a,21-Dihydroxy-5b-pregnane-3,11,20-trione
343.191	6.86384	0.461427	C01124	M-H2O-H [1-]	18-Hydroxycorticosterone
343.191	6.86384	0.461427	C05490	M-H [1-]	11-Dehydrocorticosterone
345.06	0.411948	0.996389	C19588	M-H [1-]	Aflatoxin B1 diol
346.055	-0.256083	0.959395	C00020	M-H [1-]	Adenosine monophosphate
346.055	-0.256083	0.959395	C00360	M-H+O [1-]	Deoxyadenosine monophosphate
346.055	-0.256083	0.959395	C00362	M-H [1-]	2'-Deoxyguanosine 5'-monophosphate
347.185	2.89922	0.00113503	C05498	M-H+O [1-]	11b-Hydroxyprogesterone
349.112	10.8314	0.772066	C02538	M-H [1-]	Estrone sulfate
349.2	2.46304	0.00434069	C05956	M-H2O-H [1-]	Prostaglandin G2
351.218	2.20792	0.0154914	C14781	M-H+O [1-]	15H-11,12-EETA
351.218	2.20792	0.0154914	C14813	M-H+O [1-]	11H-14,15-EETA
351.218	2.20792	0.0154914	C05966	M-H+O [1-]	15(S)-HPETE
351.218	2.20792	0.0154914	C05356	M-H+O [1-]	5(S)-Hydroperoxyeicosatetraenoic acid
351.218	2.20792	0.0154914	C02165	M-H+O [1-]	Leukotriene B4
351.218	2.20792	0.0154914	C00427	M-H [1-]	Prostaglandin H2
351.218	2.20792	0.0154914	C00696	M-H [1-]	Prostaglandin D2
351.218	2.20792	0.0154914	C00584	M-H [1-]	Prostaglandin E2
351.218	2.20792	0.0154914	C14823	M-H+O [1-]	8(S)-HPETE
351.218	2.20792	0.0154914	C14812	M-H+O [1-]	12(R)-HPETE
351.218	2.20792	0.0154914	C05965	M-H+O [1-]	12(S)-HPETE
351.218	2.20792	0.0154914	C04853	M-H [1-]	20-Hydroxy-leukotriene B4
351.218	2.20792	0.0154914	C01312	M-H [1-]	Prostaglandin I2
351.218	2.20792	0.0154914	C02198	M-H [1-]	Thromboxane A2
353.233	2.57867	0.971466	C14772	M-H+O [1-]	5,6-DHET
353.233	2.57867	0.971466	C14773	M-H+O [1-]	8,9-DiHETrE
353.233	2.57867	0.971466	C14774	M-H+O [1-]	11,12-DiHETrE
353.233	2.57867	0.971466	C14775	M-H+O [1-]	14,15-DiHETrE
353.233	2.57867	0.971466	C14782	M-H [1-]	11,12,15-THETA
353.233	2.57867	0.971466	C14814	M-H [1-]	11,14,15-THETA
353.233	2.57867	0.971466	C05959	M-H [1-]	11b-PGF2a
353.233	2.57867	0.971466	C00639	M-H [1-]	Prostaglandin F2a
354.187	-4.72075	0.000174048	C16549	M-H2O-H [1-]	alpha-Hydroxy-N-desmethyltamoxifen
354.187	-4.72075	0.000174048	C16547	M-H2O-H [1-]	Endoxifen
357.105	1.51421	0.1182	C00089	M-H+O [1-]	Sucrose
357.105	1.51421	0.1182	C05402	M-H+O [1-]	Melibiose
357.105	1.51421	0.1182	C05400	M-H+O [1-]	Isomaltose
357.105	1.51421	0.1182	C01235	M-H+O [1-]	Beta-Cortol
357.105	1.51421	0.1182	C00243	M-H+O [1-]	Alpha-Lactose
357.105	1.51421	0.1182	C00185	M-H+O [1-]	1-beta-D-Glucopyranosyl-4-D-glucopyranose
357.105	1.51421	0.1182	C01083	M-H+O [1-]	Trehalose
357.105	1.51421	0.1182	C00208	M-H+O [1-]	D-Maltose
357.105	1.51421	0.1182	C00252	M-H+O [1-]	Isomaltose
359.12	1.24453	0.999994	C05399	M-H+O [1-]	Melibiitol
359.188	4.54323	0.224453	C01780	M-H [1-]	Aldosterone
359.188	4.54323	0.224453	C00762	M-H [1-]	Cortisone
359.188	4.54323	0.224453	C05490	M-H+O [1-]	11-Dehydrocorticosterone
367.212	2.63719	0.00856515	C05956	M-H [1-]	Prostaglandin G2
367.212	2.63719	0.00856515	C00427	M-H+O [1-]	Prostaglandin H2
367.212	2.63719	0.00856515	C00696	M-H+O [1-]	Prostaglandin D2
367.212	2.63719	0.00856515	C00584	M-H+O [1-]	Prostaglandin E2
367.212	2.63719	0.00856515	C04853	M-H+O [1-]	20-Hydroxy-leukotriene B4
367.212	2.63719	0.00856515	C01312	M-H+O [1-]	Prostaglandin I2
367.212	2.63719	0.00856515	C02198	M-H+O [1-]	Thromboxane A2
369.23	2.64931	0.878702	C14782	M-H+O [1-]	11,12,15-THETA
369.23	2.64931	0.878702	C14814	M-H+O [1-]	11,14,15-THETA
369.23	2.64931	0.878702	C05959	M-H+O [1-]	11b-PGF2a
369.23	2.64931	0.878702	C00639	M-H+O [1-]	Prostaglandin F2a
374.031	-8.5825	8.16841e-06	C16620	M-H2O-H [1-]	6-Methylthioguanosine monophosphate
375.183	0.349102	0.924595	C01780	M-H+O [1-]	Aldosterone
375.183	0.349102	0.924595	C00762	M-H+O [1-]	Cortisone
377.198	-0.274287	0.956542	C00735	M-H+O [1-]	Cortisol
377.198	-0.274287	0.956542	C05469	M-H+O [1-]	17a,21-Dihydroxy-5b-pregnane-3,11,20-trione
377.198	-0.274287	0.956542	C01124	M-H+O [1-]	18-Hydroxycorticosterone
380.257	1.8294	0.00375643	C01120	M-H [1-]	Sphinganine 1-phosphate
383.209	3.38163	0.0813103	C05956	M-H+O [1-]	Prostaglandin G2
384.07	2.00296	0.0310519	C05983	M-H2O-H [1-]	Propinol adenylate
389.269	2.7898	0.997207	C00695	M-H2O-H [1-]	Cholic acid
391.284	-3.72895	0.556393	C02528	M-H [1-]	Chenodeoxycholic acid
399.325	0.787991	0.971688	C05443	M-H+O [1-]	Vitamin D3
399.325	0.787991	0.971688	C05437	M-H+O [1-]	Zymosterol intermediate 2
399.325	0.787991	0.971688	C01561	M-H [1-]	Calcidiol
399.325	0.787991	0.971688	C01164	M-H+O [1-]	7-Dehydrocholesterol
399.325	0.787991	0.971688	C05439	M-H+O [1-]	5a-Cholesta-7,24-dien-3b-ol
399.325	0.787991	0.971688	C01802	M-H+O [1-]	Desmosterol
399.325	0.787991	0.971688	C05455	M-H [1-]	7a-Hydroxy-cholestene-3-one
399.325	0.787991	0.971688	C05453	M-H2O-H [1-]	7a,12a-Dihydroxy-5b-cholestan-3-one
399.325	0.787991	0.971688	C06341	M-H2O-H [1-]	7-a,27-Dihydroxycholesterol
399.325	0.787991	0.971688	C15520	M-H2O-H [1-]	7-a,25-Dihydroxycholesterol
399.325	0.787991	0.971688	C05445	M-H2O-H [1-]	3a,7a-Dihydroxy-5b-cholestan-26-al
399.325	0.787991	0.971688	C15518	M-H2O-H [1-]	7alpha,24S-Dihydroxycholesterol
399.325	0.787991	0.971688	C05501	M-H2O-H [1-]	20a,22b-Dihydroxycholesterol
399.325	0.787991	0.971688	C05499	M-H2O-H [1-]	17alpha,20alpha-Dihydroxycholesterol
415.322	0.474649	0.993797	C01561	M-H+O [1-]	Calcidiol
415.322	0.474649	0.993797	C01673	M-H [1-]	Calcitriol
415.322	0.474649	0.993797	C07712	M-H [1-]	24R,25-Dihydroxyvitamin D3
415.322	0.474649	0.993797	C17339	M-H [1-]	4-Cholesten-7alpha,12alpha-diol-3-one
415.322	0.474649	0.993797	C05455	M-H+O [1-]	7a-Hydroxy-cholestene-3-one
415.322	0.474649	0.993797	C01301	M-H2O-H [1-]	3a,7a,12a-Trihydroxy-5b-cholestan-26-al
415.322	0.474649	0.993797	C04554	M-H2O-H [1-]	3a,7a-Dihydroxycoprostanic acid
415.322	0.474649	0.993797	C17333	M-H [1-]	3 beta-Hydroxy-5-cholestenoate
415.322	0.474649	0.993797	C17336	M-H [1-]	7 alpha,26-Dihydroxy-4-cholesten-3-one
415.322	0.474649	0.993797	C17332	M-H [1-]	7alpha,25-Dihydroxy-4-cholesten-3-one
415.322	0.474649	0.993797	C17331	M-H [1-]	7 alpha,24-Dihydroxy-4-cholesten-3-one
417.337	1.00284	0.772635	C15610	M-H+O [1-]	Cholest-5-ene-3beta,26-diol
417.337	1.00284	0.772635	C15519	M-H+O [1-]	25-Hydroxycholesterol
417.337	1.00284	0.772635	C05453	M-H [1-]	7a,12a-Dihydroxy-5b-cholestan-3-one
417.337	1.00284	0.772635	C05451	M-H+O [1-]	7a-Hydroxy-5b-cholestan-3-one
417.337	1.00284	0.772635	C05446	M-H2O-H [1-]	27-Deoxy-5b-cyprinol
417.337	1.00284	0.772635	C06341	M-H [1-]	7-a,27-Dihydroxycholesterol
417.337	1.00284	0.772635	C03594	M-H+O [1-]	7a-Hydroxycholesterol
417.337	1.00284	0.772635	C15520	M-H [1-]	7-a,25-Dihydroxycholesterol
417.337	1.00284	0.772635	C13550	M-H+O [1-]	24-Hydroxycholesterol
417.337	1.00284	0.772635	C05445	M-H [1-]	3a,7a-Dihydroxy-5b-cholestan-26-al
417.337	1.00284	0.772635	C15518	M-H [1-]	7alpha,24S-Dihydroxycholesterol
417.337	1.00284	0.772635	C05501	M-H [1-]	20a,22b-Dihydroxycholesterol
417.337	1.00284	0.772635	C05500	M-H+O [1-]	20alpha-Hydroxycholesterol
417.337	1.00284	0.772635	C05499	M-H [1-]	17alpha,20alpha-Dihydroxycholesterol
417.337	1.00284	0.772635	C05502	M-H+O [1-]	22b-Hydroxycholesterol
422.122	1.03113	0.357938	C00504	M-H2O-H [1-]	Folic acid
424.137	0.896223	0.262222	C00415	M-H2O-H [1-]	Dihydrofolic acid
429.299	0.745474	0.955422	C17337	M-H [1-]	7alpha-Hydroxy-3-oxo-4-cholestenoate
431.317	1.16671	0.387703	C01673	M-H+O [1-]	Calcitriol
431.317	1.16671	0.387703	C18231	M-H [1-]	24-Hydroxycalcitriol
431.317	1.16671	0.387703	C07712	M-H+O [1-]	24R,25-Dihydroxyvitamin D3
431.317	1.16671	0.387703	C17339	M-H+O [1-]	4-Cholesten-7alpha,12alpha-diol-3-one
431.317	1.16671	0.387703	C17335	M-H [1-]	3beta,7alpha-Dihydroxy-5-cholestenoate
431.317	1.16671	0.387703	C17333	M-H+O [1-]	3 beta-Hydroxy-5-cholestenoate
431.317	1.16671	0.387703	C17336	M-H+O [1-]	7 alpha,26-Dihydroxy-4-cholesten-3-one
431.317	1.16671	0.387703	C17332	M-H+O [1-]	7alpha,25-Dihydroxy-4-cholesten-3-one
431.317	1.16671	0.387703	C17331	M-H+O [1-]	7 alpha,24-Dihydroxy-4-cholesten-3-one
433.332	0.494753	0.92904	C05453	M-H+O [1-]	7a,12a-Dihydroxy-5b-cholestan-3-one
433.332	0.494753	0.92904	C01301	M-H [1-]	3a,7a,12a-Trihydroxy-5b-cholestan-26-al
433.332	0.494753	0.92904	C06341	M-H+O [1-]	7-a,27-Dihydroxycholesterol
433.332	0.494753	0.92904	C15520	M-H+O [1-]	7-a,25-Dihydroxycholesterol
433.332	0.494753	0.92904	C04554	M-H [1-]	3a,7a-Dihydroxycoprostanic acid
433.332	0.494753	0.92904	C05445	M-H+O [1-]	3a,7a-Dihydroxy-5b-cholestan-26-al
433.332	0.494753	0.92904	C15518	M-H+O [1-]	7alpha,24S-Dihydroxycholesterol
433.332	0.494753	0.92904	C05501	M-H+O [1-]	20a,22b-Dihydroxycholesterol
433.332	0.494753	0.92904	C05499	M-H+O [1-]	17alpha,20alpha-Dihydroxycholesterol
436.137	1.03875	0.221294	C00445	M-H2O-H [1-]	5,10-Methenyltetrahydrofolic acid
440.134	1.12603	0.131896	C00504	M-H [1-]	Folic acid
447.311	0.30275	0.996655	C18231	M-H+O [1-]	24-Hydroxycalcitriol
447.311	0.30275	0.996655	C17335	M-H+O [1-]	3beta,7alpha-Dihydroxy-5-cholestenoate
449.326	-0.0178726	1	C01301	M-H+O [1-]	3a,7a,12a-Trihydroxy-5b-cholestan-26-al
449.326	-0.0178726	1	C04554	M-H+O [1-]	3a,7a-Dihydroxycoprostanic acid
451.341	1.0529	0.755178	C05446	M-H+O [1-]	27-Deoxy-5b-cyprinol
457.331	2.60948	0.998832	C15808	M-H+O [1-]	4a-Carboxy-4b-methyl-5a-cholesta-8,24-dien-3b-ol
463.196	-1.3522	0.54651	C05504	M-H [1-]	Estriol-16-Glucuronide
463.196	-1.3522	0.54651	C05503	M-H+O [1-]	17-beta-Estradiol-3-glucuronide
463.235	5.81246	0.0305622	C11134	M-H [1-]	Testosterone glucuronide
465.25	7.11831	0.000287486	C11136	M-H [1-]	Etiocholanolone glucuronide
465.25	7.11831	0.000287486	C11135	M-H [1-]	Androsterone glucuronide
465.306	-1.5601	0.983809	C18043	M-H [1-]	Cholesterol sulfate
477.214	7.41582	0.366891	C11131	M-H [1-]	2-Methoxy-estradiol-17b 3-glucuronide
479.229	5.42787	0.110158	C11134	M-H+O [1-]	Testosterone glucuronide
481.244	5.67976	0.101075	C11136	M-H+O [1-]	Etiocholanolone glucuronide
481.244	5.67976	0.101075	C11135	M-H+O [1-]	Androsterone glucuronide
481.298	-1.62844	0.94945	C18043	M-H+O [1-]	Cholesterol sulfate
491.191	0.0656096	0.999923	C11132	M-H+O [1-]	2-Methoxyestrone 3-glucuronide
503.162	1.19088	0.504293	C05404	M-H [1-]	D-Gal alpha 1->6D-Gal alpha 1->6D-Glucose
503.162	1.19088	0.504293	C00492	M-H [1-]	Raffinose
503.162	1.19088	0.504293	C00721	M-H [1-]	Dextrin
530.279	0.813103	0.536216	C05122	M-H+O [1-]	Taurocholic acid
631.491	5.16024	0.0590298	G00157	M-H [1-]	(Gal)2 (GlcA)1 (Xyl)1 (Ser)1
653.26	0.691968	0.914924	C05770	M-H [1-]	Coproporphyrin III
669.254	-0.677423	0.974404	C05770	M-H+O [1-]	Coproporphyrin III
