# Supplementary material for: Multi-omics characterization of human kidneys identifies cPLA2-arachidonic acid metabolism as a potential driver of inflammation
Source: Research Square preprint supplement (doi:10.21203/rs.3.rs-1461691/v1), 2022-04-07
Supplement: Supplementary file 4 [file b1dca59adb884cce08fa3dc6.xlsx]

## Sheet: Sheet1
Serum lipid species	Pearson correlation coefficient, r	p-value
Carnitine_(18:0)	0.7114	0.0029
Cer_(43:1)	0.5576	0.0308
Cer_(44:1)	0.5191	0.0474
DG_(38:1)	0.5525	0.0327
GM3_(32:1)	0.5294	0.0424
GM3_(35:1)	0.5456	0.0354
GM3_(36:1)	0.5192	0.0473
GM3_(37:0)	-0.5586	0.0304
GM3_(40:1)	0.5315	0.0415
Hex-Cer_(36:1-OH)	0.6575	0.0077
Hex-Cer_(36:1)	0.6471	0.0091
Hex-Cer_(37:2)	0.542	0.0369
Hex-Cer_(37:1)	0.7294	0.002
Hex-Cer_(39:1)	0.6115	0.0154
Hex-Cer_(40:0)	0.5657	0.028
Hex-Cer_(41:1)	0.6557	0.008
Hex-Cer_(42:1)	0.5755	0.0248
Lacto-cer_(40:1-OH)	0.6882	0.0046
LPC_(14:0)	0.8442	1e-05
LPC_(16:1)	0.8592	1e-05
LPC_(18:2)	0.7084	0.0031
LPC_(20:5)	0.7922	0.0004
LPE_(18:2)	0.6317	0.0115
LPC_(15:0)	0.8359	0.0001
LPE_(20:5)	0.6269	0.0124
LPC_(17:1)	0.8495	1e-05
LPC_(16:0)	0.8327	0.0001
LPC_(18:1)	0.6735	0.0059
LPC_(17:0)	0.7431	0.0015
LPC_(18:0)	0.6706	0.0062
LPE_(18:0)	0.6143	0.0148
LPC_(20:3)	0.6836	0.005
LPE_(20:3)	0.7146	0.0028
LPC_(20:0)	0.52	0.0469
LPC_(24:0)	0.6148	0.0147
LPI_(16:0)	0.5602	0.0299
LPI_(20:3)	0.5769	0.0243
LPI_(18:1)	0.6897	0.0044
PI_(32:1)	0.5907	0.0204
PI_(36:4)	0.5737	0.0253
PI_(34:2)	0.6003	0.018
PI_(38:5)	0.5831	0.0225
PI_(33:1)	0.6897	0.0044
PI_(36:3)	0.6416	0.0099
PI_(37:4)	0.6112	0.0155
PI_(35:2)	0.5445	0.0358
PI_(34:1)	0.6032	0.0173
PI_(36:2)	0.5311	0.0416
PI_(35:1)	0.624	0.0129
PI_(38:3)	0.6763	0.0056
PI_(36:1)	0.5964	0.0189
PC_(34:4)	0.5379	0.0386
PC_(35:3)	0.5443	0.0359
PC_(36:3)	0.6158	0.0145
PC_(40:7)	0.5967	0.0189
PC_(33:0)	0.6217	0.0133
PC_(34:0)	0.7086	0.0031
SM_(32:1)	0.5409	0.0373
SM_(32:0)	0.5477	0.0346
SM_(33:1)	0.5946	0.0194
SM_(34:1)	0.6211	0.0135
SM_(34:0)	0.5472	0.0348
SM_(35:1)	0.5678	0.0272
SM_(36:1)	0.5851	0.022
SM_(38:1)	0.6423	0.0098
SM_(40:2)	0.6108	0.0156
SM_(38:0)	0.566	0.0278
SM_(39:1)	0.5441	0.036
SM_(42:2)	0.537	0.039
SM_(40:1)	0.5781	0.024
SM_(40:0)	0.5427	0.0366
SM_(41:1)	0.5155	0.0492
S_(32:1-OH)	0.566	0.0278
S_(32:1)	0.5911	0.0203
S_(33:1-OH)	0.5671	0.0275
S_(34:1-OH)	0.6968	0.0039
S_(34:1)	0.609	0.016
FFA_(12:0)	-0.6467	0.0092
FFA_(18:3)	-0.6494	0.0088
FFA_(14:0)	-0.6068	0.0165
FFA_(16:1)	-0.5609	0.0296
FFA_(18:2)	-0.7109	0.003
FFA_(17:1)	-0.5345	0.0401
FFA_(22:4)	-0.626	0.0126
FFA_(18:1)	-0.6426	0.0098
FFA_(20:2)	-0.6292	0.012
FFA_(17:0)	-0.5545	0.0319
FFA_(20:1)	-0.6066	0.0165
