# Supplementary material for: Multi-omics characterization of human kidneys identifies cPLA2-arachidonic acid metabolism as a potential driver of inflammation
Source: Research Square preprint supplement (doi:10.21203/rs.3.rs-1461691/v1), 2022-04-07
Supplement: Supplementary file 5 [file d86df94d150c83d7333cc7ef.xlsx]

## Sheet: Sheet1
Kidney lipid species	Pearson correlation coefficient, r	p-value
Cer_(33:1)	-0.6429	0.0017
Cer_(34:1)	-0.8425	<0.0001
Cer_(34:0)	-0.572	0.0067
Cer_(35:1)	-0.5306	0.0133
Cer_(36:1)	-0.7538	<0.0001
Cer_(40:2)	-0.7567	<0.0001
Cer_(41:2)	-0.5619	0.008
Cer_(40:1)	-0.5581	0.0086
Cer_(42:2)	-0.6915	0.0005
CL_(71:08)	0.4355	0.0484
CL_(76:11)	0.4418	0.0449
CL_(72:08)	0.4416	0.0451
CL_(69:06)	0.6299	0.0022
CL_(71:07)	0.6154	0.003
CL_(68:05)	0.5267	0.0142
CL_(72:07)	0.6149	0.003
CL_(69:05)	0.6276	0.0023
CL_(71:06)	0.6153	0.003
CL_(68:04)	0.4828	0.0266
CL_(69:04)	0.5153	0.0168
CL_(72:06)	0.6051	0.0037
CL_(72:05)	0.6015	0.0039
CL_(74:05)	0.4336	0.0496
DG_(40:5)	-0.522	0.0152
DG_(42:3)	-0.5715	0.0068
GB4_(34:1)	-0.591	0.0048
GB3_(34:1)	-0.545	0.0106
GB3_(38:0)	-0.4898	0.0242
GB4_(42:2)	-0.4984	0.0215
GB4_(40:1)	-0.4482	0.0416
Hex-Cer_(38:1)	-0.5118	0.0177
Hex-Cer_(41:1)	-0.4634	0.0344
Lacto-cer_(32:1)	0.5428	0.011
Lacto-cer_(39:1-OH)	0.566	0.0075
LPC_(15:0)	0.4488	0.0413
LPC_(17:1)	0.471	0.0311
LPE_(16:0)	0.5463	0.0104
LPE_(18:1)	0.4384	0.0468
LPC_(17:0)	0.4728	0.0304
LPE_(17:0)	0.5165	0.0165
LPI_(20:1)	0.4684	0.0322
PI_(35:1)	0.7351	0.0001
PI_(38:3)	0.435	0.0488
PI_(34:0)	0.6827	0.0006
PI_(36:1)	0.5676	0.0073
PI_(38:2)	0.5682	0.0072
PI_(37:1)	0.7794	<0.0001
Mono-lyso_CL_(54:06)	0.489	0.0245
Mono-lyso_CL_(54:05)	0.4773	0.0287
MGDG_(34:2)	-0.4793	0.0279
PC_(33:1)	0.4363	0.048
PC_(37:3)	0.5952	0.0044
PC_(35:1)	0.491	0.0238
PC_(42:7)	-0.7373	0.0001
PE_(35:1)	0.4344	0.0491
PG_(38:6)	0.6685	0.0009
PG_(33:1)	0.4658	0.0333
PG_(36:3)	0.4432	0.0442
PG_(35:1)	0.4769	0.0288
PG_(34:0)	-0.4896	0.0243
SM_(33:1)	0.5153	0.0168
SM_(34:0)	0.4752	0.0295
SM_(35:1)	0.5827	0.0056
SM_(36:1)	0.6271	0.0023
SM_(36:0)	0.625	0.0025
SM_(37:1)	0.6627	0.0011
SM_(38:1)	0.5196	0.0158
SM_(38:0)	0.602	0.0039
SM_(39:1)	0.5953	0.0044
SM_(40:1)	0.5393	0.0116
SM_(40:0)	0.535	0.0125
SM_(41:1)	0.5807	0.0058
SM_(41:0)	0.4991	0.0213
SM_(44:2)	0.4843	0.0261
SM_(42:1)	0.537	0.0121
SM_(42:0)	0.4912	0.0238
SM_(43:1)	0.4782	0.0283
SM_(44:1)	0.4897	0.0243
S_(33:1-OH)	0.4363	0.048
TG_(58:11)	-0.5908	0.0048
TG_(56:8)	-0.7599	<0.0001
TG_(58:9)	-0.7348	0.0001
TG_(54:6)	-0.6355	0.002
TG_(58:8)	-0.7582	<0.0001
TG_(56:7)	-0.7151	0.0003
TG_(54:5)	-0.5734	0.0066
TG_(55:6)	-0.5966	0.0043
TG_(56:6)	-0.6977	0.0004
TG_(58:7)	-0.7149	0.0003
TG_(55:5)	-0.5912	0.0048
TG_(54:4)	-0.4956	0.0223
TG_(56:5)	-0.7239	0.0002
TG_(58:6)	-0.7185	0.0002
TG_(54:3)	-0.4461	0.0427
TG_(56:4)	-0.6738	0.0008
TG_(55:3)	-0.4817	0.027
TG_(58:5)	-0.8741	<0.0001
TG_(56:3)	-0.5298	0.0135
TG_(57:0)	-0.5931	0.0046
FFA_(20:5)	0.6349	0.002
FFA_(22:6)	0.4921	0.0235
FFA_(20:4)	0.4516	0.0399
FFA_(18:2)	0.5094	0.0184
FFA_(20:3)	0.488	0.0248
