# Supplementary material for: Multi-omics characterization of human kidneys identifies cPLA2-arachidonic acid metabolism as a potential driver of inflammation
Source: Research Square preprint supplement (doi:10.21203/rs.3.rs-1461691/v1), 2022-04-07
Supplement: Supplementary file 6 [file f31426823e2408c5d4b4aa7e.xlsx]

## Sheet: Sheet1
Lipid class	log2FC	p-value	Adjusted p-value
Carnitine_(12:0-OH)	NA	0.836251	0.911685
Carnitine_(14:2)	0.236793	0.862065	0.927935
Carnitine_(14:0-OH)	NA	1	1
Carnitine_(14:0)	#NAME?	0.147941	0.371608
Carnitine_(20:4)	0.762625	1	1
Carnitine_(15:0)	NA	0.422678	0.580496
Carnitine_(18:2)	0.0242666	0.955089	0.985373
Carnitine_(20:3)	-0.141809	0.516868	0.676889
Carnitine_(16:0)	-0.229858	0.694328	0.795937
Carnitine_(18:0-OH)	NA	0.203551	0.428369
Carnitine_(18:1)	0.271817	0.694328	0.795937
Carnitine_(17:1)	NA	0.422678	0.580496
Carnitine_(17:0)	Inf	0.16066	0.388337
Carnitine_(20:2)	NA	0.349575	0.544615
Carnitine_(18:0)	1.9174	0.00422329	0.178645
Carnitine_(20:1)	-0.427179	1	1
Carnitine_(20:0)	NA	0.349575	0.544615
Cer_(34:1)	0.29006	0.694328	0.795937
Cer_(34:0)	NA	0.679326	0.795937
Cer_(35:1)	#NAME?	0.583044	0.736202
Cer_(36:2)	NA	0.408108	0.580496
Cer_(36:1)	0.291032	0.694328	0.795937
Cer_(36:0)	1.10355	0.953011	0.985373
Cer_(37:1)	-0.0425863	0.679988	0.795937
Cer_(40:2)	0.499118	0.396892	0.576925
Cer_(38:1-OH)	NA	0.647704	0.782797
Cer_(38:1)	0.0780568	1	1
Cer_(39:1)	0.97125	0.189277	0.412703
Cer_(41:2)	0.450951	0.280963	0.491106
Cer_(40:1)	0.892749	0.189277	0.412703
Cer_(42:2)	0.737505	0.189277	0.412703
Cer_(40:0)	1.20378	0.463403	0.610653
Cer_(41:1)	0.940872	0.120591	0.344661
Cer_(43:2)	1.06649	0.0938617	0.33647
Cer_(41:0)	1.3567	0.222654	0.458297
Cer_(42:1)	0.625326	0.231857	0.458297
Cer_(43:1)	1.05378	0.0540793	0.289564
Cer_(44:1)	0.998818	0.0540793	0.289564
Cer_(45:1)	Inf	0.120233	0.344661
CL_(74:12)	NA	0.422678	0.580496
CL_(72:10)	NA	0.265315	0.491106
CL_(74:11)	NA	0.55686	0.707362
CL_(76:12)	NA	0.142345	0.371608
CL_(74:10)	Inf	0.530253	0.682686
CL_(70:07)	Inf	0.116636	0.344661
CL_(76:11)	Inf	0.258595	0.491106
CL_(72:08)	NA	0.370432	0.569792
CL_(69:06)	NA	0.422678	0.580496
CL_(71:07)	NA	0.301389	0.520357
CL_(70:06)	NA	0.206791	0.433033
CL_(72:07)	1.49089	0.316472	0.537621
CL_(71:06)	NA	0.203551	0.428369
CL_(68:04)	NA	0.349575	0.544615
CL_(70:05)	NA	0.265315	0.491106
CL_(72:06)	2.10951	0.0921673	0.33647
CL_(70:04)	NA	0.448529	0.608101
CL_(68:02)	NA	0.265315	0.491106
CL_(70:03)	NA	0.203551	0.428369
CL_(70:02)	NA	0.422678	0.580496
CL_(72:03)	NA	0.422678	0.580496
CPE_(34:2)	-0.747059	0.522962	0.682686
CPE_(36:2)	NA	1	1
CPE_(36:1)	1.47224	0.293271	0.510508
CPE_(38:2)	-0.148954	0.953011	0.985373
CPE_(42:2)	0.0703427	0.955089	0.985373
CPE_(42:1)	-0.33176	0.53582	0.682686
DGDG_(36:0)	0.612841	0.612587	0.751085
DG_(40:5)	NA	0.947952	0.985373
DG_(34:1)	1.06704	0.0938617	0.33647
DG_(40:4)	Inf	0.530253	0.682686
DG_(42:5)	1.14941	0.0798387	0.33647
DG_(35:1)	0.957688	0.116897	0.344661
DG_(36:2)	0.865304	0.231857	0.458297
DG_(36:1)	1.06483	0.151981	0.371608
DG_(42:3)	NA	0.940803	0.985373
DG_(38:2)	NA	0.370432	0.569792
DG_(38:1)	1.59086	0.116897	0.344661
GD1_(34:1)	0.434902	1	1
GD1_(36:2)	0.438827	0.859684	0.927935
GD1_(36:1)	-0.272959	0.694328	0.795937
GB4_(34:1)	1.12075	0.381133	0.576925
GB3_(34:1)	-0.137996	0.778866	0.860133
GB3_(40:1)	-0.700048	0.116897	0.344661
GB4_(42:1)	NA	0.922085	0.982474
GB3_(42:1)	Inf	0.0732405	0.322716
GM2_(32:1)	Inf	0.214863	0.44772
GM3_(32:1)	0.552513	0.189277	0.412703
GM3_(34:0)	0.417986	0.280963	0.491106
GM3_(35:1)	0.684702	0.0721057	0.322716
GM2_(36:1)	0.0973651	0.562485	0.712368
GM2_(36:0)	NA	0.922085	0.982474
GM3_(36:1)	0.691096	0.0721057	0.322716
GM3_(36:0)	0.280967	0.280963	0.491106
GM3_(37:0)	-1.44408	0.0540793	0.289564
GM3_(40:1)	0.438579	0.0289044	0.247364
Hex-Cer_(32:1)	1.85912	0.0141957	0.247364
Hex-Cer_(34:2)	-0.465437	0.955089	0.985373
Hex-Cer_(35:1)	0.385218	0.231857	0.458297
Hex-Cer_(36:1-OH)	0.777368	0.0021756	0.15338
Hex-Cer_(36:2)	Inf	0.33898	0.543138
Hex-Cer_(36:1)	1.30018	0.0400932	0.282657
Hex-Cer_(37:2)	0.349618	0.231857	0.458297
Hex-Cer_(37:1)	0.6451	0.0289044	0.247364
Hex-Cer_(38:1)	0.0891387	0.396892	0.576925
Hex-Cer_(39:1)	0.536296	0.335664	0.539871
Hex-Cer_(39:0)	0.0960164	0.694328	0.795937
Hex-Cer_(40:0)	0.130944	0.280963	0.491106
Hex-Cer_(41:1)	0.259597	0.151981	0.371608
Hex-Cer_(42:2)	-0.107274	0.685177	0.795937
Hex-Cer_(42:1)	0.318638	0.189277	0.412703
Lacto-cer_(32:1-OH)	0.361272	0.612587	0.751085
Lacto-cer_(32:1)	-0.0442159	0.463403	0.610653
Lacto-cer_(34:2)	-0.921921	0.151981	0.371608
Lacto-cer_(34:1-OH)	#NAME?	0.0449578	0.289564
Lacto-cer_(34:1)	0.227663	1	1
Lacto-cer_(35:1)	Inf	0.427825	0.585664
Lacto-cer_(36:1)	0.644414	0.53582	0.682686
Lacto-cer_(38:1-OH)	NA	1	1
Lacto-cer_(40:2-OH)	0.238259	0.383714	0.576925
Lacto-cer_(38:1)	1.25316	0.0938617	0.33647
Lacto-cer_(40:2)	-0.0100476	0.778866	0.860133
Lacto-cer_(40:1-OH)	2.15623	0.0227797	0.247364
Lacto-cer_(42:2-OH)	0.950458	0.120591	0.344661
Lacto-cer_(40:1)	0.0243479	0.955089	0.985373
Lacto-cer_(42:2)	-0.107174	0.694328	0.795937
Lacto-cer_(42:0-OH)	1.43882	0.316472	0.537621
Lacto-cer_(42:1-OH)	0.677992	0.231857	0.458297
Lacto-cer_(42:1)	0.0129985	1	1
Lacto-cer_(44:2)	-0.410353	0.694328	0.795937
LPC_(14:0)	1.44538	0.00590521	0.208159
LPC_(16:1)	1.19718	0.0037296	0.175291
LPC_(18:2)	1.60352	0.0400932	0.282657
LPC_(20:5)	1.51346	0.0540793	0.289564
LPE_(18:2)	2.59735	0.0175711	0.247364
LPC_(15:0)	0.987141	0.0021756	0.15338
LPE_(20:5)	3.01746	0.0292392	0.247364
LPC_(17:1)	1.10731	0.0037296	0.175291
LPC_(16:0)	0.511627	0.013986	0.247364
LPE_(16:0)	Inf	0.16066	0.388337
LPC_(18:1)	0.945137	0.0205128	0.247364
LPE_(18:1)	1.1906	0.0725931	0.322716
LPC_(17:0)	0.646876	0.0205128	0.247364
LPE_(22:5)	1.08691	0.675706	0.795937
LPC_(18:0)	0.176808	0.120591	0.344661
LPC_(22:4)	0.813248	0.0938617	0.33647
LPE_(18:0)	1.48016	0.00932401	0.219114
LPC_(20:3)	0.121213	0.189277	0.412703
LPE_(20:3)	Inf	0.0238564	0.247364
LPC_(19:0)	0.547827	0.117884	0.344661
LPC_(20:1)	0.56843	0.0400932	0.282657
LPC_(20:0)	0.603842	0.120591	0.344661
LPC_(22:3)	Inf	0.0779787	0.33647
LPC_(22:2)	NA	0.448529	0.608101
LPC_(22:0)	1.00797	0.151981	0.371608
LPC_(24:0)	0.703199	0.189277	0.412703
LPI_(20:5)	Inf	0.129585	0.360622
LPI_(18:3)	NA	0.349575	0.544615
LPI_(16:1)	1.57839	0.0239018	0.247364
LPI_(18:2)	0.405453	0.189277	0.412703
LPI_(20:4)	0.354951	0.335664	0.539871
LPI_(16:0)	1.80245	0.0205128	0.247364
LPI_(20:3)	1.10008	0.0938617	0.33647
LPI_(18:1)	Inf	0.00716097	0.219114
LPI_(20:2)	1.37763	0.0553192	0.292327
LPI_(18:0)	0.904891	0.0938617	0.33647
LPI_(20:0)	NA	0.823704	0.900328
PI_(32:1)	2.23974	0.00932401	0.219114
PI_(36:4)	1.05859	0.0721057	0.322716
PI_(34:2)	0.920567	0.0205128	0.247364
PI_(38:5)	0.536983	0.0721057	0.322716
PI_(33:1)	2.19972	0.0012432	0.15338
PI_(36:3)	1.54413	0.00932401	0.219114
PI_(37:4)	0.520442	0.0289044	0.247364
PI_(35:2)	1.29523	0.0721057	0.322716
PI_(32:0)	2.02846	0.00932401	0.219114
PI_(40:6)	0.960763	0.0721057	0.322716
PI_(34:1)	1.3644	0.0037296	0.175291
PI_(38:4)	0.113602	0.612587	0.751085
PI_(40:5)	0.408438	0.189277	0.412703
PI_(36:2)	1.38573	0.00590521	0.208159
PI_(35:1)	3.03548	0.0003108	0.131469
PI_(38:3)	1.09287	0.0205128	0.247364
PI_(40:4)	0.12678	0.280963	0.491106
PI_(36:1)	1.17763	0.000621601	0.131469
PI_(38:2)	2.06825	0.0021756	0.15338
Mono-lyso_CL_(54:06)	NA	0.265315	0.491106
Mono-lyso_CL_(54:05)	NA	0.844737	0.918571
MGDG_(34:2)	#NAME?	0.451363	0.609989
MGDG_(34:1)	NA	0.782864	0.860133
MGDG_(36:1)	NA	0.730481	0.8284
MGDG_(38:1)	NA	0.370432	0.569792
PC_(34:4)	0.975734	0.0938617	0.33647
PC_(32:2)	0.488452	0.0289044	0.247364
PC_(34:3)	0.366843	0.120591	0.344661
PC_(36:5)	0.536616	0.396892	0.576925
PC_(33:2)	0.465025	0.120591	0.344661
PC_(30:0)	0.746306	0.151981	0.371608
PC_(35:3)	0.782554	0.013986	0.247364
PC_(38:6)	0.437936	0.335664	0.539871
PC_(32:1)	0.667229	0.151981	0.371608
PC_(36:4)	0.00618934	0.955089	0.985373
PC_(38:5)	0.17071	0.612587	0.751085
PC_(34:2)	0.12088	0.335664	0.539871
PC_(36:3)	0.585611	0.0540793	0.289564
PC_(39:6)	0.837467	0.463403	0.610653
PC_(31:0)	0.517024	0.0938617	0.33647
PC_(33:1)	0.277563	0.120591	0.344661
PC_(40:7)	0.410602	0.013986	0.247364
PC_(37:4)	-0.322061	0.694328	0.795937
PC_(35:2)	0.0711759	0.396892	0.576925
PC_(37:3)	0.766685	0.0938617	0.33647
PC_(32:0)	0.208823	0.778866	0.860133
PC_(40:6)	0.266943	0.778866	0.860133
PC_(34:1)	0.273655	0.151981	0.371608
PC_(38:4)	-0.18811	0.335664	0.539871
PC_(40:5)	0.14434	0.694328	0.795937
PC_(36:2)	0.245782	0.396892	0.576925
PC_(33:0)	0.904081	0.0205128	0.247364
PC_(35:1)	0.485394	0.0540793	0.289564
PC_(38:3)	0.383629	0.463403	0.610653
PC_(42:8)	-0.150362	0.612587	0.751085
PC_(37:2)	0.268598	0.189277	0.412703
PC_(40:4)	0.25115	0.778866	0.860133
PC_(42:7)	-0.131939	0.463403	0.610653
PC_(34:0)	0.373123	0.0289044	0.247364
PC_(38:2)	0.456194	0.189277	0.412703
PC_(36:1)	0.379842	0.396892	0.576925
PC_(40:3)	0.347693	0.396892	0.576925
PC_(38:1)	NA	0.71041	0.812172
PC_(37:1)	1.11082	0.726095	0.82564
PC_(35:0)	NA	0.408108	0.580496
PC_(40:2)	0.745428	0.396892	0.576925
PC_(36:0)	-0.463743	0.189277	0.412703
PC_(40:1)	0.998712	0.396892	0.576925
PC_(39:0)	NA	1	1
PE_(36:2)	0.420633	0.280963	0.491106
PE_(38:8)	NA	0.782864	0.860133
PE_(38:6)	0.320253	0.335664	0.539871
PE_(32:1)	Inf	0.0995927	0.344661
PE_(36:4)	0.494122	0.280963	0.491106
PE_(40:8)	NA	0.203551	0.428369
PE_(34:2)	NA	0.422678	0.580496
PE_(38:5)	1.91444	0.26289	0.491106
PE_(36:3)	Inf	0.067746	0.322716
PE_(40:6)	0.51986	0.612587	0.751085
PE_(34:1)	0.800312	0.231857	0.458297
PE_(40:7)	0.376147	0.27116	0.491106
PE_(38:4)	0.207186	0.612587	0.751085
PE_(35:1)	NA	0.744125	0.841617
PE_(38:3)	5.42556	0.11492	0.344661
PE_(40:4)	NA	0.448529	0.608101
PE_(34:0)	NA	0.408108	0.580496
PE_(36:1)	0.735112	0.151981	0.371608
PE_(38:1)	0.912961	0.335664	0.539871
PG_(37:6)	0.390565	0.335664	0.539871
PG_(32:1)	NA	0.422678	0.580496
PG_(36:4)	1.16211	0.0540793	0.289564
PG_(34:2)	NA	0.142345	0.371608
PG_(33:1)	-1.11179	1	1
PG_(36:3)	1.52668	0.128996	0.360622
PG_(35:1)	#NAME?	0.190518	0.413277
PG_(34:0)	0.388901	0.396892	0.576925
PG_(36:1)	0.993045	0.516868	0.676889
PS_(32:1)	#NAME?	0.131993	0.364922
PS_(34:2)	NA	0.349575	0.544615
PS_(34:1)	-0.25387	0.770335	0.860133
PS_(38:4)	0.852882	0.189277	0.412703
PS_(36:2)	-0.189798	0.694328	0.795937
PS_(35:1)	-0.728242	0.53582	0.682686
PS_(40:4)	-0.929635	0.269871	0.491106
PS_(35:0)	0.518435	0.0540793	0.289564
PS_(36:1)	-0.19703	0.694328	0.795937
PS_(38:2)	-0.0521297	0.953692	0.985373
PS_(38:1)	NA	0.422678	0.580496
PS_(39:1)	0.26668	0.632585	0.773363
PS_(40:2)	1.69343	0.316472	0.537621
PS_(40:1)	NA	0.142345	0.371608
SM_(32:1)	0.645373	0.0540793	0.289564
SM_(32:0)	1.1482	0.0938617	0.33647
SM_(33:1)	0.740038	0.013986	0.247364
SM_(34:1-OH)	0.883012	0.53582	0.682686
SM_(34:1)	0.255101	0.0400932	0.282657
SM_(36:2)	0.0979627	0.612587	0.751085
SM_(34:0)	0.927198	0.0205128	0.247364
SM_(35:1)	0.832865	0.0540793	0.289564
SM_(37:2)	0.183759	0.396892	0.576925
SM_(36:1)	0.518616	0.0400932	0.282657
SM_(38:2)	0.238785	0.463403	0.610653
SM_(36:0)	1.81373	0.120591	0.344661
SM_(37:1)	0.662913	0.0721057	0.322716
SM_(37:0)	NA	0.422678	0.580496
SM_(38:1)	0.841024	0.0205128	0.247364
SM_(40:2)	0.428016	0.00932401	0.219114
SM_(38:0)	1.35547	0.0721057	0.322716
SM_(39:1)	0.935144	0.0400932	0.282657
SM_(42:2)	0.216985	0.151981	0.371608
SM_(40:1)	0.608052	0.0289044	0.247364
SM_(40:0)	0.672242	0.0721057	0.322716
SM_(41:1)	0.803642	0.0289044	0.247364
SM_(41:0)	1.2626	0.189277	0.412703
SM_(44:2)	0.259814	0.280963	0.491106
SM_(42:1)	0.508483	0.120591	0.344661
SM_(42:0)	0.756037	0.231857	0.458297
SM_(43:1)	1.14099	0.120591	0.344661
SM_(44:1)	0.754333	0.189277	0.412703
S_(32:2)	NA	0.414002	0.580496
S_(32:1-OH)	1.12361	0.0540793	0.289564
S_(32:1)	0.973936	0.120591	0.344661
S_(33:1-OH)	3.37408	0.0421027	0.289564
S_(32:0)	NA	0.349575	0.544615
S_(33:1)	Inf	0.129585	0.360622
S_(34:1-OH)	0.837776	0.0289044	0.247364
S_(34:1)	0.726642	0.231857	0.458297
S_(34:0)	0.775712	0.280963	0.491106
S_(35:1)	NA	0.203551	0.428369
S_(37:2)	NA	0.422678	0.580496
S_(36:1)	2.77854	0.669411	0.795937
S_(40:1)	0.0710761	1	1
S_(41:1)	3.5603	0.067746	0.322716
S_(42:1-OH)	0.488261	0.280963	0.491106
S_(44:2)	2.06015	0.27116	0.491106
S_(42:1)	0.685616	0.280963	0.491106
S_(44:1)	NA	0.804004	0.881072
TG_(36:0)	Inf	0.102684	0.344661
TG_(42:2)	0.900701	0.860952	0.927935
TG_(42:1)	1.60237	0.778866	0.860133
TG_(44:2)	0.291812	0.953816	0.985373
TG_(46:3)	0.102135	0.280963	0.491106
TG_(48:4)	0.22686	0.120591	0.344661
TG_(43:1)	NA	0.647704	0.782797
TG_(45:2)	0.814924	0.350201	0.544615
TG_(58:11)	-0.317606	0.866511	0.927935
TG_(50:5)	0.624614	0.0721057	0.322716
TG_(42:0)	Inf	0.379581	0.576925
TG_(44:1)	0.314444	0.396892	0.576925
TG_(46:2)	-0.14991	0.335664	0.539871
TG_(48:3)	0.484718	0.0540793	0.289564
TG_(43:0)	NA	0.408108	0.580496
TG_(56:8)	0.281795	0.612587	0.751085
TG_(45:1)	NA	0.301389	0.520357
TG_(50:4)	0.66308	0.0289044	0.247364
TG_(47:2)	0.715763	0.146561	0.371608
TG_(52:5)	0.74496	0.013986	0.247364
TG_(58:9)	-0.0400459	0.53582	0.682686
TG_(49:3)	0.561111	0.0205128	0.247364
TG_(54:6)	0.515056	0.0540793	0.289564
TG_(44:0)	NA	0.647704	0.782797
TG_(58:8)	0.326929	0.726095	0.82564
TG_(46:1)	0.665231	0.189277	0.412703
TG_(48:2)	0.629765	0.120591	0.344661
TG_(56:7)	0.536193	0.280963	0.491106
TG_(50:3)	0.537269	0.0289044	0.247364
TG_(45:0)	1.65124	0.25618	0.491106
TG_(52:4)	0.537303	0.0289044	0.247364
TG_(47:1)	Inf	0.315286	0.537621
TG_(54:5)	0.637519	0.120591	0.344661
TG_(49:2)	0.97373	0.0321233	0.266434
TG_(51:3)	0.81086	0.0400932	0.282657
TG_(55:6)	1.18274	0.120591	0.344661
TG_(53:4)	0.894333	0.0289044	0.247364
TG_(56:6)	0.566593	0.694328	0.795937
TG_(46:0)	1.02628	0.242908	0.477908
TG_(58:7)	0.452938	0.323537	0.539871
TG_(48:1)	0.990882	0.0938617	0.33647
TG_(50:2)	0.886996	0.0721057	0.322716
TG_(55:5)	0.0982372	0.866511	0.927935
TG_(52:3)	0.846733	0.0938617	0.33647
TG_(47:0)	1.73571	0.140714	0.371608
TG_(54:4)	0.807403	0.335664	0.539871
TG_(49:1)	0.954151	0.0540793	0.289564
TG_(59:6)	NA	0.203551	0.428369
TG_(51:2)	1.13231	0.0400932	0.282657
TG_(56:5)	0.467267	0.955089	0.985373
TG_(53:3)	1.1952	0.0400932	0.282657
TG_(58:6)	NA	0.422678	0.580496
TG_(50:1)	1.10683	0.151981	0.371608
TG_(52:2)	1.42393	0.120591	0.344661
TG_(48:0)	0.572961	0.120591	0.344661
TG_(54:3)	0.973304	0.189277	0.412703
TG_(49:0)	0.525341	0.0930451	0.33647
TG_(56:4)	0.647401	0.463403	0.610653
TG_(51:1)	1.2558	0.0540793	0.289564
TG_(53:2)	1.40507	0.0938617	0.33647
TG_(59:5)	-0.160434	0.612587	0.751085
TG_(55:3)	1.11347	0.0938617	0.33647
TG_(50:0)	0.594043	0.0938617	0.33647
TG_(52:1)	1.3852	0.0938617	0.33647
TG_(54:2)	1.67319	0.151981	0.371608
TG_(56:3)	0.875225	0.231857	0.458297
TG_(53:1)	1.2823	0.0559775	0.292327
TG_(55:2)	Inf	0.127298	0.360622
TG_(56:2)	1.99728	0.144377	0.371608
TG_(52:0)	0.239731	0.0938617	0.33647
TG_(54:1)	2.34332	0.11492	0.344661
TG_(55:1)	NA	0.142345	0.371608
TG_(53:0)	-0.00542176	1	1
TG_(54:0)	0.116382	0.280963	0.491106
TG_(58:2)	0.417859	0.643132	0.782797
TG_(56:0)	NA	0.349575	0.544615
TG_(58:0)	1.52287	0.246505	0.482738
FFA_(12:0)	-0.538241	0.120591	0.344661
FFA_(20:5)	0.443651	0.463403	0.610653
FFA_(18:3)	-1.18402	0.120591	0.344661
FFA_(14:0)	-0.577569	0.151981	0.371608
FFA_(16:1)	-0.89976	0.189277	0.412703
FFA_(22:6)	-0.141854	0.955089	0.985373
FFA_(20:4)	-0.132201	0.778866	0.860133
FFA_(18:2)	-0.636254	0.0540793	0.289564
FFA_(15:0)	-0.34655	0.231857	0.458297
FFA_(22:5)	-0.613807	0.335664	0.539871
FFA_(17:1)	-0.182292	0.280963	0.491106
FFA_(20:3)	-0.00428556	0.778866	0.860133
FFA_(16:0)	-0.212805	0.335664	0.539871
FFA_(22:4)	-0.528352	0.0540793	0.289564
FFA_(18:1)	-0.238567	0.0938617	0.33647
FFA_(20:2)	-0.230241	0.189277	0.412703
FFA_(17:0)	-0.154243	0.120591	0.344661
FFA_(20:1)	-0.0130608	0.335664	0.539871
FFA_(22:3)	-0.436839	0.53582	0.682686
FFA_(18:0)	-0.0718466	0.396892	0.576925
FFA_(22:2)	-0.213385	0.280963	0.491106
FFA_(20:0)	-0.0289398	0.866511	0.927935
FFA_(22:1)	-0.0379094	0.694328	0.795937
