# Supplementary material for: Multi-omics characterization of human kidneys identifies cPLA2-arachidonic acid metabolism as a potential driver of inflammation
Source: Research Square preprint supplement (doi:10.21203/rs.3.rs-1461691/v1), 2022-04-07
Supplement: Supplementary file 7 [file 6d06d07cb333695da914f00b.xlsx]

## Sheet: Supplementary Table 5 DEG AKI V
	gene_ensembl	gene_symbol	gene_description	log2FC	log2CPM	p-value	FDR
ENSG00000000003 (TSPAN6)	ENSG00000000003	TSPAN6	tetraspanin 6	-0.228534	4.47496	0.256435	0.956389
ENSG00000000419 (DPM1)	ENSG00000000419	DPM1	dolichyl-phosphate mannosyltransferase subunit 1, catalytic	0.123303	3.73727	0.331317	0.979354
ENSG00000000457 (SCYL3)	ENSG00000000457	SCYL3	SCY1 like pseudokinase 3	0.0135649	4.27024	0.915279	0.998725
ENSG00000000460 (C1orf112)	ENSG00000000460	C1orf112	chromosome 1 open reading frame 112	-0.149998	2.18565	0.509477	0.99492
ENSG00000000938 (FGR)	ENSG00000000938	FGR	FGR proto-oncogene, Src family tyrosine kinase	0.580937	2.62456	0.103615	0.892502
ENSG00000000971 (CFH)	ENSG00000000971	CFH	complement factor H	0.0819663	6.16834	0.574634	0.99492
ENSG00000001036 (FUCA2)	ENSG00000001036	FUCA2	alpha-L-fucosidase 2	0.412318	5.51377	0.00035664	0.134161
ENSG00000001084 (GCLC)	ENSG00000001084	GCLC	glutamate-cysteine ligase catalytic subunit	0.16459	5.47992	0.186945	0.929403
ENSG00000001167 (NFYA)	ENSG00000001167	NFYA	nuclear transcription factor Y subunit alpha	0.113643	4.79119	0.412137	0.988956
ENSG00000001460 (STPG1)	ENSG00000001460	STPG1	sperm tail PG-rich repeat containing 1	-0.0951408	3.31334	0.570605	0.99492
ENSG00000001461 (NIPAL3)	ENSG00000001461	NIPAL3	NIPA like domain containing 3	-0.0939911	5.75007	0.467284	0.989281
ENSG00000001497 (LAS1L)	ENSG00000001497	LAS1L	LAS1 like ribosome biogenesis factor	0.198348	4.77374	0.0859207	0.864726
ENSG00000001561 (ENPP4)	ENSG00000001561	ENPP4	ectonucleotide pyrophosphatase/phosphodiesterase 4	0.190764	4.83382	0.390934	0.98756
ENSG00000001617 (SEMA3F)	ENSG00000001617	SEMA3F	semaphorin 3F	0.0383027	5.24084	0.813709	0.998396
ENSG00000001626 (CFTR)	ENSG00000001626	CFTR	CF transmembrane conductance regulator	0.826341	3.39946	0.135682	0.905272
ENSG00000001629 (ANKIB1)	ENSG00000001629	ANKIB1	ankyrin repeat and IBR domain containing 1	-0.129115	6.5014	0.269936	0.964846
ENSG00000001630 (CYP51A1)	ENSG00000001630	CYP51A1	cytochrome P450 family 51 subfamily A member 1	-0.088172	6.08431	0.660605	0.99492
ENSG00000001631 (KRIT1)	ENSG00000001631	KRIT1	KRIT1 ankyrin repeat containing	-0.0629317	5.51471	0.575396	0.99492
ENSG00000002016 (RAD52)	ENSG00000002016	RAD52	RAD52 homolog, DNA repair protein	-0.100344	3.93437	0.55981	0.99492
ENSG00000002330 (BAD)	ENSG00000002330	BAD	BCL2 associated agonist of cell death	0.0468681	4.26619	0.637553	0.99492
ENSG00000002549 (LAP3)	ENSG00000002549	LAP3	leucine aminopeptidase 3	0.423927	6.4902	0.104249	0.892502
ENSG00000002586 (CD99)	ENSG00000002586	CD99	CD99 molecule (Xg blood group)	0.122125	5.71451	0.465141	0.989281
ENSG00000002587 (HS3ST1)	ENSG00000002587	HS3ST1	heparan sulfate-glucosamine 3-sulfotransferase 1	0.80659	4.32785	0.0749565	0.854913
ENSG00000002726 (AOC1)	ENSG00000002726	AOC1	amine oxidase copper containing 1	0.336503	7.25781	0.418158	0.988956
ENSG00000002746 (HECW1)	ENSG00000002746	HECW1	HECT, C2 and WW domain containing E3 ubiquitin protein ligase 1	0.149628	5.47857	0.732713	0.994974
ENSG00000002822 (MAD1L1)	ENSG00000002822	MAD1L1	mitotic arrest deficient 1 like 1	0.116785	4.03173	0.413958	0.988956
ENSG00000002834 (LASP1)	ENSG00000002834	LASP1	LIM and SH3 protein 1	0.0852949	7.58705	0.514385	0.99492
ENSG00000002919 (SNX11)	ENSG00000002919	SNX11	sorting nexin 11	0.0949117	3.99508	0.42349	0.989281
ENSG00000002933 (TMEM176A)	ENSG00000002933	TMEM176A	transmembrane protein 176A	0.194551	6.88575	0.105794	0.892502
ENSG00000003056 (M6PR)	ENSG00000003056	M6PR	mannose-6-phosphate receptor, cation dependent	0.155895	6.19882	0.11948	0.90314
ENSG00000003096 (KLHL13)	ENSG00000003096	KLHL13	kelch like family member 13	-0.0278216	4.61557	0.878043	0.998725
ENSG00000003137 (CYP26B1)	ENSG00000003137	CYP26B1	cytochrome P450 family 26 subfamily B member 1	0.690617	5.00048	0.102172	0.888532
ENSG00000003147 (ICA1)	ENSG00000003147	ICA1	islet cell autoantigen 1	0.220311	4.37988	0.176107	0.926446
ENSG00000003249 (DBNDD1)	ENSG00000003249	DBNDD1	dysbindin domain containing 1	0.0115571	3.83283	0.97142	0.998939
ENSG00000003393 (ALS2)	ENSG00000003393	ALS2	alsin Rho guanine nucleotide exchange factor ALS2	-0.00674977	5.67079	0.939247	0.998939
ENSG00000003400 (CASP10)	ENSG00000003400	CASP10	caspase 10	0.21102	4.71575	0.132615	0.903655
ENSG00000003402 (CFLAR)	ENSG00000003402	CFLAR	CASP8 and FADD like apoptosis regulator	0.0654534	8.62839	0.545432	0.99492
ENSG00000003436 (TFPI)	ENSG00000003436	TFPI	tissue factor pathway inhibitor	0.34818	7.04591	0.221755	0.948398
ENSG00000003509 (NDUFAF7)	ENSG00000003509	NDUFAF7	NADH:ubiquinone oxidoreductase complex assembly factor 7	0.165031	3.85331	0.163404	0.926446
ENSG00000003756 (RBM5)	ENSG00000003756	RBM5	RNA binding motif protein 5	0.0773266	6.99218	0.52215	0.99492
ENSG00000003987 (MTMR7)	ENSG00000003987	MTMR7	myotubularin related protein 7	-0.635112	0.790139	0.259205	0.957807
ENSG00000003989 (SLC7A2)	ENSG00000003989	SLC7A2	solute carrier family 7 member 2	0.327201	6.34058	0.20877	0.943602
ENSG00000004059 (ARF5)	ENSG00000004059	ARF5	ADP ribosylation factor 5	0.120019	5.13243	0.209221	0.943731
ENSG00000004139 (SARM1)	ENSG00000004139	SARM1	sterile alpha and TIR motif containing 1	0.127322	5.20234	0.262103	0.958323
ENSG00000004142 (POLDIP2)	ENSG00000004142	POLDIP2	DNA polymerase delta interacting protein 2	-0.0975492	6.61392	0.438484	0.989281
ENSG00000004399 (PLXND1)	ENSG00000004399	PLXND1	plexin D1	-0.0486955	6.82115	0.729852	0.99492
ENSG00000004455 (AK2)	ENSG00000004455	AK2	adenylate kinase 2	0.0571078	7.5124	0.62766	0.99492
ENSG00000004468 (CD38)	ENSG00000004468	CD38	CD38 molecule	0.0950866	1.74609	0.795936	0.998396
ENSG00000004478 (FKBP4)	ENSG00000004478	FKBP4	FKBP prolyl isomerase 4	-0.106589	6.49633	0.451091	0.989281
ENSG00000004487 (KDM1A)	ENSG00000004487	KDM1A	lysine demethylase 1A	0.0571996	5.54334	0.537191	0.99492
ENSG00000004534 (RBM6)	ENSG00000004534	RBM6	RNA binding motif protein 6	-0.00759738	6.95366	0.94865	0.998939
ENSG00000004660 (CAMKK1)	ENSG00000004660	CAMKK1	calcium/calmodulin dependent protein kinase kinase 1	-0.0249525	2.6179	0.913411	0.998725
ENSG00000004700 (RECQL)	ENSG00000004700	RECQL	RecQ like helicase	0.300851	4.47361	0.0693922	0.852047
ENSG00000004766 (VPS50)	ENSG00000004766	VPS50	VPS50 subunit of EARP/GARPII complex	-0.0462276	4.81993	0.700782	0.99492
ENSG00000004776 (HSPB6)	ENSG00000004776	HSPB6	heat shock protein family B (small) member 6	-0.576303	4.67867	0.0583303	0.83195
ENSG00000004777 (ARHGAP33)	ENSG00000004777	ARHGAP33	Rho GTPase activating protein 33	-0.0904482	3.58767	0.618056	0.99492
ENSG00000004779 (NDUFAB1)	ENSG00000004779	NDUFAB1	NADH:ubiquinone oxidoreductase subunit AB1	-0.0834242	4.14947	0.585464	0.99492
ENSG00000004799 (PDK4)	ENSG00000004799	PDK4	pyruvate dehydrogenase kinase 4	1.35903	7.88959	0.0317678	0.743813
ENSG00000004838 (ZMYND10)	ENSG00000004838	ZMYND10	zinc finger MYND-type containing 10	-0.128838	0.359243	0.640812	0.99492
ENSG00000004864 (SLC25A13)	ENSG00000004864	SLC25A13	solute carrier family 25 member 13	0.202789	5.5043	0.133542	0.904287
ENSG00000004866 (ST7)	ENSG00000004866	ST7	suppression of tumorigenicity 7	0.0553214	4.83589	0.64104	0.99492
ENSG00000004897 (CDC27)	ENSG00000004897	CDC27	cell division cycle 27	0.0525872	5.61644	0.650224	0.99492
ENSG00000004939 (SLC4A1)	ENSG00000004939	SLC4A1	solute carrier family 4 member 1 (Diego blood group)	-0.0798102	7.06866	0.85161	0.998725
ENSG00000004948 (CALCR)	ENSG00000004948	CALCR	calcitonin receptor	-0.214377	2.03847	0.548197	0.99492
ENSG00000004961 (HCCS)	ENSG00000004961	HCCS	holocytochrome c synthase	0.147591	3.92117	0.195371	0.933408
ENSG00000004975 (DVL2)	ENSG00000004975	DVL2	dishevelled segment polarity protein 2	0.0976119	4.88596	0.449381	0.989281
ENSG00000005001 (PRSS22)	ENSG00000005001	PRSS22	serine protease 22	0.482173	1.51348	0.110447	0.89684
ENSG00000005007 (UPF1)	ENSG00000005007	UPF1	UPF1 RNA helicase and ATPase	-0.191854	7.00479	0.0482805	0.810879
ENSG00000005020 (SKAP2)	ENSG00000005020	SKAP2	src kinase associated phosphoprotein 2	0.0350282	5.71742	0.731348	0.99492
ENSG00000005022 (SLC25A5)	ENSG00000005022	SLC25A5	solute carrier family 25 member 5	-0.152928	7.3337	0.308904	0.973619
ENSG00000005059 (MCUB)	ENSG00000005059	MCUB	mitochondrial calcium uniporter dominant negative beta subunit	0.176426	1.35681	0.618835	0.99492
ENSG00000005073 (HOXA11)	ENSG00000005073	HOXA11	homeobox A11	-0.33707	2.00005	0.284272	0.970902
ENSG00000005075 (POLR2J)	ENSG00000005075	POLR2J	RNA polymerase II subunit J	0.0104449	3.52612	0.931682	0.998939
ENSG00000005100 (DHX33)	ENSG00000005100	DHX33	DEAH-box helicase 33	0.166581	4.43287	0.139098	0.907236
ENSG00000005108 (THSD7A)	ENSG00000005108	THSD7A	thrombospondin type 1 domain containing 7A	-0.262644	6.30556	0.102475	0.890447
ENSG00000005156 (LIG3)	ENSG00000005156	LIG3	DNA ligase 3	-0.0580207	5.43998	0.586111	0.99492
ENSG00000005175 (RPAP3)	ENSG00000005175	RPAP3	RNA polymerase II associated protein 3	0.0499752	3.88377	0.712297	0.99492
ENSG00000005187 (ACSM3)	ENSG00000005187	ACSM3	acyl-CoA synthetase medium chain family member 3	-0.314659	5.50478	0.176069	0.926446
ENSG00000005189 (REXO5)	ENSG00000005189	REXO5	RNA exonuclease 5	-0.260657	0.942742	0.417962	0.988956
ENSG00000005194 (CIAPIN1)	ENSG00000005194	CIAPIN1	cytokine induced apoptosis inhibitor 1	0.0742485	4.62534	0.507593	0.99492
ENSG00000005206 (SPPL2B)	ENSG00000005206	SPPL2B	signal peptide peptidase like 2B	0.0156777	5.93009	0.88058	0.998725
ENSG00000005238 (FAM214B)	ENSG00000005238	FAM214B	family with sequence similarity 214 member B	0.361772	4.52236	0.00893743	0.506017
ENSG00000005243 (COPZ2)	ENSG00000005243	COPZ2	COPI coat complex subunit zeta 2	-0.194793	2.74744	0.186437	0.929403
ENSG00000005249 (PRKAR2B)	ENSG00000005249	PRKAR2B	protein kinase cAMP-dependent type II regulatory subunit beta	-0.0874863	3.41674	0.745654	0.995009
ENSG00000005302 (MSL3)	ENSG00000005302	MSL3	MSL complex subunit 3	0.202534	4.21366	0.167468	0.926446
ENSG00000005339 (CREBBP)	ENSG00000005339	CREBBP	CREB binding protein	-0.0277274	7.47507	0.796943	0.998396
ENSG00000005379 (TSPOAP1)	ENSG00000005379	TSPOAP1	TSPO associated protein 1	-0.210126	5.02853	0.220974	0.948398
ENSG00000005436 (GCFC2)	ENSG00000005436	GCFC2	GC-rich sequence DNA-binding factor 2	-0.151547	3.95174	0.293457	0.971453
ENSG00000005448 (WDR54)	ENSG00000005448	WDR54	WD repeat domain 54	0.0592141	2.52377	0.731008	0.99492
ENSG00000005469 (CROT)	ENSG00000005469	CROT	carnitine O-octanoyltransferase	-0.0456679	4.06959	0.781555	0.997994
ENSG00000005471 (ABCB4)	ENSG00000005471	ABCB4	ATP binding cassette subfamily B member 4	0.00640658	1.05476	0.984301	0.998939
ENSG00000005483 (KMT2E)	ENSG00000005483	KMT2E	lysine methyltransferase 2E	-0.0244741	6.97419	0.839045	0.998725
ENSG00000005486 (RHBDD2)	ENSG00000005486	RHBDD2	rhomboid domain containing 2	0.0924802	5.68848	0.433141	0.989281
ENSG00000005513 (SOX8)	ENSG00000005513	SOX8	SRY-box transcription factor 8	-0.252185	-0.108631	0.555957	0.99492
ENSG00000005700 (IBTK)	ENSG00000005700	IBTK	inhibitor of Bruton tyrosine kinase	0.149273	6.12062	0.280147	0.968824
ENSG00000005801 (ZNF195)	ENSG00000005801	ZNF195	zinc finger protein 195	0.156962	5.11941	0.17848	0.926513
ENSG00000005810 (MYCBP2)	ENSG00000005810	MYCBP2	MYC binding protein 2	0.0539353	7.53214	0.671721	0.99492
ENSG00000005812 (FBXL3)	ENSG00000005812	FBXL3	F-box and leucine rich repeat protein 3	-0.0739068	5.47739	0.638038	0.99492
ENSG00000005844 (ITGAL)	ENSG00000005844	ITGAL	integrin subunit alpha L	-0.019101	3.06273	0.971094	0.998939
ENSG00000005882 (PDK2)	ENSG00000005882	PDK2	pyruvate dehydrogenase kinase 2	-0.270687	6.11895	0.308131	0.973573
ENSG00000005884 (ITGA3)	ENSG00000005884	ITGA3	integrin subunit alpha 3	0.411576	7.83716	0.183453	0.928847
ENSG00000005889 (ZFX)	ENSG00000005889	ZFX	zinc finger protein X-linked	-0.0267154	5.92801	0.811062	0.998396
ENSG00000005893 (LAMP2)	ENSG00000005893	LAMP2	lysosomal associated membrane protein 2	0.0349978	7.25615	0.825857	0.998725
ENSG00000005961 (ITGA2B)	ENSG00000005961	ITGA2B	integrin subunit alpha 2b	-0.170938	0.703696	0.446867	0.989281
ENSG00000005981 (ASB4)	ENSG00000005981	ASB4	ankyrin repeat and SOCS box containing 4	0.995987	-0.239366	0.0340676	0.758344
ENSG00000006007 (GDE1)	ENSG00000006007	GDE1	glycerophosphodiester phosphodiesterase 1	-0.0575804	5.42759	0.51393	0.99492
ENSG00000006015 (REX1BD)	ENSG00000006015	REX1BD	required for excision 1-B domain containing	-0.0425337	4.17367	0.759197	0.995009
ENSG00000006016 (CRLF1)	ENSG00000006016	CRLF1	cytokine receptor like factor 1	-0.20896	1.78245	0.662657	0.99492
ENSG00000006025 (OSBPL7)	ENSG00000006025	OSBPL7	oxysterol binding protein like 7	0.0908542	3.57971	0.6017	0.99492
ENSG00000006042 (TMEM98)	ENSG00000006042	TMEM98	transmembrane protein 98	-0.253541	4.30013	0.0650927	0.845644
ENSG00000006047 (YBX2)	ENSG00000006047	YBX2	Y-box binding protein 2	0.0223235	1.5487	0.953738	0.998939
ENSG00000006062 (MAP3K14)	ENSG00000006062	MAP3K14	mitogen-activated protein kinase kinase kinase 14	0.144679	4.96938	0.492816	0.994432
ENSG00000006071 (ABCC8)	ENSG00000006071	ABCC8	ATP binding cassette subfamily C member 8	0.0866801	0.925076	0.812303	0.998396
ENSG00000006118 (TMEM132A)	ENSG00000006118	TMEM132A	transmembrane protein 132A	0.364315	3.21742	0.271644	0.966302
ENSG00000006125 (AP2B1)	ENSG00000006125	AP2B1	adaptor related protein complex 2 subunit beta 1	0.105738	7.84642	0.210642	0.944285
ENSG00000006128 (TAC1)	ENSG00000006128	TAC1	tachykinin precursor 1	1.0117	0.0701879	0.132145	0.903594
ENSG00000006194 (ZNF263)	ENSG00000006194	ZNF263	zinc finger protein 263	0.00994239	4.54562	0.927232	0.998939
ENSG00000006210 (CX3CL1)	ENSG00000006210	CX3CL1	C-X3-C motif chemokine ligand 1	-0.193672	5.41883	0.187073	0.929403
ENSG00000006282 (SPATA20)	ENSG00000006282	SPATA20	spermatogenesis associated 20	0.011519	5.64723	0.964093	0.998939
ENSG00000006327 (TNFRSF12A)	ENSG00000006327	TNFRSF12A	TNF receptor superfamily member 12A	0.657526	4.76754	0.103071	0.890621
ENSG00000006432 (MAP3K9)	ENSG00000006432	MAP3K9	mitogen-activated protein kinase kinase kinase 9	0.0317382	4.92217	0.793641	0.998396
ENSG00000006451 (RALA)	ENSG00000006451	RALA	RAS like proto-oncogene A	0.0681775	4.55942	0.599029	0.99492
ENSG00000006453 (BAIAP2L1)	ENSG00000006453	BAIAP2L1	BAR/IMD domain containing adaptor protein 2 like 1	-0.336212	4.24546	0.047203	0.809779
ENSG00000006459 (KDM7A)	ENSG00000006459	KDM7A	lysine demethylase 7A	0.0318733	5.07688	0.834188	0.998725
ENSG00000006468 (ETV1)	ENSG00000006468	ETV1	ETS variant transcription factor 1	0.29459	2.34882	0.238851	0.953502
ENSG00000006530 (AGK)	ENSG00000006530	AGK	acylglycerol kinase	0.00894665	4.56394	0.93573	0.998939
ENSG00000006534 (ALDH3B1)	ENSG00000006534	ALDH3B1	aldehyde dehydrogenase 3 family member B1	-0.0643535	5.08283	0.710753	0.99492
ENSG00000006555 (TTC22)	ENSG00000006555	TTC22	tetratricopeptide repeat domain 22	-0.222257	4.89098	0.235679	0.953245
ENSG00000006576 (PHTF2)	ENSG00000006576	PHTF2	putative homeodomain transcription factor 2	0.292535	4.21682	0.119603	0.90314
ENSG00000006607 (FARP2)	ENSG00000006607	FARP2	FERM, ARH/RhoGEF and pleckstrin domain protein 2	0.00604015	5.84031	0.947986	0.998939
ENSG00000006611 (USH1C)	ENSG00000006611	USH1C	USH1 protein network component harmonin	0.120421	6.57042	0.350805	0.983375
ENSG00000006625 (GGCT)	ENSG00000006625	GGCT	gamma-glutamylcyclotransferase	0.0155766	3.76801	0.91253	0.998725
ENSG00000006634 (DBF4)	ENSG00000006634	DBF4	DBF4 zinc finger	0.118331	1.7667	0.591329	0.99492
ENSG00000006638 (TBXA2R)	ENSG00000006638	TBXA2R	thromboxane A2 receptor	0.0888217	3.32618	0.56524	0.99492
ENSG00000006652 (IFRD1)	ENSG00000006652	IFRD1	interferon related developmental regulator 1	0.192966	4.83724	0.33507	0.980398
ENSG00000006695 (COX10)	ENSG00000006695	COX10	cytochrome c oxidase assembly factor heme A:farnesyltransferase COX10	0.168534	4.22834	0.12851	0.90314
ENSG00000006704 (GTF2IRD1)	ENSG00000006704	GTF2IRD1	GTF2I repeat domain containing 1	0.0201782	5.323	0.898865	0.998725
ENSG00000006712 (PAF1)	ENSG00000006712	PAF1	PAF1 homolog, Paf1/RNA polymerase II complex component	-0.0236574	5.06487	0.814655	0.998396
ENSG00000006715 (VPS41)	ENSG00000006715	VPS41	VPS41 subunit of HOPS complex	0.0539765	6.01225	0.556956	0.99492
ENSG00000006740 (ARHGAP44)	ENSG00000006740	ARHGAP44	Rho GTPase activating protein 44	-0.241344	3.66114	0.161809	0.926446
ENSG00000006744 (ELAC2)	ENSG00000006744	ELAC2	elaC ribonuclease Z 2	0.0781713	5.78318	0.436683	0.989281
ENSG00000006747 (SCIN)	ENSG00000006747	SCIN	scinderin	-0.118921	6.94226	0.464038	0.989281
ENSG00000006756 (ARSD)	ENSG00000006756	ARSD	arylsulfatase D	0.0386324	7.15055	0.757436	0.995009
ENSG00000006757 (PNPLA4)	ENSG00000006757	PNPLA4	patatin like phospholipase domain containing 4	-0.0404814	4.13506	0.801118	0.998396
ENSG00000006831 (ADIPOR2)	ENSG00000006831	ADIPOR2	adiponectin receptor 2	0.0562956	5.84005	0.600828	0.99492
ENSG00000006837 (CDKL3)	ENSG00000006837	CDKL3	cyclin dependent kinase like 3	-0.0123049	0.983273	0.955714	0.998939
ENSG00000007001 (UPP2)	ENSG00000007001	UPP2	uridine phosphorylase 2	-0.810518	3.96404	0.132272	0.903594
ENSG00000007047 (MARK4)	ENSG00000007047	MARK4	microtubule affinity regulating kinase 4	0.011648	5.04676	0.908178	0.998725
ENSG00000007062 (PROM1)	ENSG00000007062	PROM1	prominin 1	-0.0861977	5.35952	0.728673	0.99492
ENSG00000007080 (CCDC124)	ENSG00000007080	CCDC124	coiled-coil domain containing 124	0.231972	4.64824	0.115043	0.89684
ENSG00000007168 (PAFAH1B1)	ENSG00000007168	PAFAH1B1	platelet activating factor acetylhydrolase 1b regulatory subunit 1	0.074916	7.2821	0.50484	0.99492
ENSG00000007171 (NOS2)	ENSG00000007171	NOS2	nitric oxide synthase 2	0.17517	1.54269	0.785119	0.998396
ENSG00000007174 (DNAH9)	ENSG00000007174	DNAH9	dynein axonemal heavy chain 9	0.186214	2.04666	0.608851	0.99492
ENSG00000007202 (KIAA0100)	ENSG00000007202	KIAA0100	KIAA0100	0.0190692	8.46329	0.884877	0.998725
ENSG00000007216 (SLC13A2)	ENSG00000007216	SLC13A2	solute carrier family 13 member 2	-0.0212996	6.02318	0.97142	0.998939
ENSG00000007237 (GAS7)	ENSG00000007237	GAS7	growth arrest specific 7	0.203485	4.00961	0.389217	0.98756
ENSG00000007255 (TRAPPC6A)	ENSG00000007255	TRAPPC6A	trafficking protein particle complex 6A	-0.0534983	3.32506	0.735837	0.994988
ENSG00000007264 (MATK)	ENSG00000007264	MATK	megakaryocyte-associated tyrosine kinase	0.235701	0.540028	0.543257	0.99492
ENSG00000007312 (CD79B)	ENSG00000007312	CD79B	CD79b molecule	-0.126795	0.471428	0.799472	0.998396
ENSG00000007314 (SCN4A)	ENSG00000007314	SCN4A	sodium voltage-gated channel alpha subunit 4	-0.193342	0.760279	0.67145	0.99492
ENSG00000007341 (ST7L)	ENSG00000007341	ST7L	suppression of tumorigenicity 7 like	0.144822	3.90763	0.274499	0.967339
ENSG00000007376 (RPUSD1)	ENSG00000007376	RPUSD1	RNA pseudouridine synthase domain containing 1	0.103053	3.31071	0.501092	0.99492
ENSG00000007384 (RHBDF1)	ENSG00000007384	RHBDF1	rhomboid 5 homolog 1	0.238252	4.0934	0.198919	0.936967
ENSG00000007392 (LUC7L)	ENSG00000007392	LUC7L	LUC7 like	0.14821	5.71316	0.281959	0.970098
ENSG00000007402 (CACNA2D2)	ENSG00000007402	CACNA2D2	calcium voltage-gated channel auxiliary subunit alpha2delta 2	-0.0457998	3.88003	0.888424	0.998725
ENSG00000007516 (BAIAP3)	ENSG00000007516	BAIAP3	BAI1 associated protein 3	-0.708474	4.27874	0.00460686	0.402545
ENSG00000007520 (TSR3)	ENSG00000007520	TSR3	TSR3 ribosome maturation factor	-0.0159819	4.45148	0.903378	0.998725
ENSG00000007541 (PIGQ)	ENSG00000007541	PIGQ	phosphatidylinositol glycan anchor biosynthesis class Q	-0.0331907	6.10076	0.79549	0.998396
ENSG00000007545 (CRAMP1)	ENSG00000007545	CRAMP1	cramped chromatin regulator homolog 1	-0.0640842	5.50932	0.564362	0.99492
ENSG00000007866 (TEAD3)	ENSG00000007866	TEAD3	TEA domain transcription factor 3	0.31652	4.85409	0.0653359	0.845644
ENSG00000007908 (SELE)	ENSG00000007908	SELE	selectin E	-0.77669	1.17497	0.349273	0.983375
ENSG00000007923 (DNAJC11)	ENSG00000007923	DNAJC11	DnaJ heat shock protein family (Hsp40) member C11	0.0408739	6.39537	0.769563	0.996679
ENSG00000007933 (FMO3)	ENSG00000007933	FMO3	flavin containing dimethylaniline monoxygenase 3	-0.185208	3.90421	0.650571	0.99492
ENSG00000007944 (MYLIP)	ENSG00000007944	MYLIP	myosin regulatory light chain interacting protein	-0.344703	5.05438	0.0422024	0.797164
ENSG00000007968 (E2F2)	ENSG00000007968	E2F2	E2F transcription factor 2	0.355059	0.36174	0.580464	0.99492
ENSG00000008018 (PSMB1)	ENSG00000008018	PSMB1	proteasome subunit beta 1	0.224604	5.46454	0.045843	0.804272
ENSG00000008056 (SYN1)	ENSG00000008056	SYN1	synapsin I	0.480814	-0.112052	0.0691225	0.852047
ENSG00000008083 (JARID2)	ENSG00000008083	JARID2	jumonji and AT-rich interaction domain containing 2	0.0515824	4.80498	0.63577	0.99492
ENSG00000008086 (CDKL5)	ENSG00000008086	CDKL5	cyclin dependent kinase like 5	-0.201116	5.53353	0.187378	0.929403
ENSG00000008118 (CAMK1G)	ENSG00000008118	CAMK1G	calcium/calmodulin dependent protein kinase IG	0.0569523	2.28079	0.794723	0.998396
ENSG00000008128 (CDK11A)	ENSG00000008128	CDK11A	cyclin dependent kinase 11A	0.105834	4.32102	0.584565	0.99492
ENSG00000008130 (NADK)	ENSG00000008130	NADK	NAD kinase	0.0543957	5.63215	0.607381	0.99492
ENSG00000008196 (TFAP2B)	ENSG00000008196	TFAP2B	transcription factor AP-2 beta	-0.642352	4.47546	0.0440628	0.803191
ENSG00000008226 (DLEC1)	ENSG00000008226	DLEC1	DLEC1 cilia and flagella associated protein	-0.252696	1.5206	0.326602	0.978328
ENSG00000008256 (CYTH3)	ENSG00000008256	CYTH3	cytohesin 3	-0.246415	4.90938	0.0612413	0.836996
ENSG00000008277 (ADAM22)	ENSG00000008277	ADAM22	ADAM metallopeptidase domain 22	0.0985778	4.45446	0.725365	0.99492
ENSG00000008282 (SYPL1)	ENSG00000008282	SYPL1	synaptophysin like 1	0.0555887	5.88759	0.741957	0.995009
ENSG00000008283 (CYB561)	ENSG00000008283	CYB561	cytochrome b561	-0.00163181	5.52814	0.98837	0.998939
ENSG00000008294 (SPAG9)	ENSG00000008294	SPAG9	sperm associated antigen 9	-0.00853751	7.64219	0.9322	0.998939
ENSG00000008300 (CELSR3)	ENSG00000008300	CELSR3	cadherin EGF LAG seven-pass G-type receptor 3	0.241499	1.51519	0.386865	0.98756
ENSG00000008311 (AASS)	ENSG00000008311	AASS	aminoadipate-semialdehyde synthase	0.168354	6.91386	0.447096	0.989281
ENSG00000008323 (PLEKHG6)	ENSG00000008323	PLEKHG6	pleckstrin homology and RhoGEF domain containing G6	-0.134146	1.13857	0.538812	0.99492
ENSG00000008324 (SS18L2)	ENSG00000008324	SS18L2	SS18 like 2	-0.0263141	1.93452	0.898341	0.998725
ENSG00000008382 (MPND)	ENSG00000008382	MPND	MPN domain containing	-0.134995	3.76511	0.379023	0.98683
ENSG00000008394 (MGST1)	ENSG00000008394	MGST1	microsomal glutathione S-transferase 1	0.469323	5.87109	0.0382475	0.781131
ENSG00000008405 (CRY1)	ENSG00000008405	CRY1	cryptochrome circadian regulator 1	-0.0320473	4.25801	0.867155	0.998725
ENSG00000008441 (NFIX)	ENSG00000008441	NFIX	nuclear factor I X	0.00528237	5.80841	0.975363	0.998939
ENSG00000008513 (ST3GAL1)	ENSG00000008513	ST3GAL1	ST3 beta-galactoside alpha-2,3-sialyltransferase 1	-0.230189	7.66797	0.34259	0.981072
ENSG00000008516 (MMP25)	ENSG00000008516	MMP25	matrix metallopeptidase 25	1.57948	0.805938	0.0105846	0.540888
ENSG00000008517 (IL32)	ENSG00000008517	IL32	interleukin 32	0.501916	7.17245	0.0958309	0.875335
ENSG00000008710 (PKD1)	ENSG00000008710	PKD1	polycystin 1, transient receptor potential channel interacting	-0.116514	6.99218	0.437991	0.989281
ENSG00000008735 (MAPK8IP2)	ENSG00000008735	MAPK8IP2	mitogen-activated protein kinase 8 interacting protein 2	0.0926623	1.80832	0.764042	0.995384
ENSG00000008838 (MED24)	ENSG00000008838	MED24	mediator complex subunit 24	0.057239	5.76077	0.537782	0.99492
ENSG00000008853 (RHOBTB2)	ENSG00000008853	RHOBTB2	Rho related BTB domain containing 2	0.044151	5.58728	0.782465	0.998084
ENSG00000008869 (HEATR5B)	ENSG00000008869	HEATR5B	HEAT repeat containing 5B	0.000475266	5.62585	0.996629	0.998983
ENSG00000008952 (SEC62)	ENSG00000008952	SEC62	SEC62 homolog, preprotein translocation factor	-0.0265653	6.85899	0.842486	0.998725
ENSG00000008988 (RPS20)	ENSG00000008988	RPS20	ribosomal protein S20	0.0314733	7.33145	0.770712	0.996756
ENSG00000009307 (CSDE1)	ENSG00000009307	CSDE1	cold shock domain containing E1	-0.034507	8.47324	0.736934	0.994988
ENSG00000009335 (UBE3C)	ENSG00000009335	UBE3C	ubiquitin protein ligase E3C	0.0838269	6.66128	0.349794	0.983375
ENSG00000009413 (REV3L)	ENSG00000009413	REV3L	REV3 like, DNA directed polymerase zeta catalytic subunit	0.0620426	6.13591	0.591966	0.99492
ENSG00000009694 (TENM1)	ENSG00000009694	TENM1	teneurin transmembrane protein 1	0.379127	5.1061	0.0409312	0.791286
ENSG00000009765 (IYD)	ENSG00000009765	IYD	iodotyrosine deiodinase	-0.499186	5.52013	0.0912802	0.873014
ENSG00000009780 (FAM76A)	ENSG00000009780	FAM76A	family with sequence similarity 76 member A	-0.0529815	3.66014	0.699321	0.99492
ENSG00000009790 (TRAF3IP3)	ENSG00000009790	TRAF3IP3	TRAF3 interacting protein 3	0.147361	2.40233	0.762454	0.995009
ENSG00000009830 (POMT2)	ENSG00000009830	POMT2	protein O-mannosyltransferase 2	0.0429204	4.89262	0.720506	0.99492
ENSG00000009844 (VTA1)	ENSG00000009844	VTA1	vesicle trafficking 1	0.00793411	4.46037	0.949636	0.998939
ENSG00000009950 (MLXIPL)	ENSG00000009950	MLXIPL	MLX interacting protein like	-0.215122	6.20361	0.365521	0.984616
ENSG00000009954 (BAZ1B)	ENSG00000009954	BAZ1B	bromodomain adjacent to zinc finger domain 1B	-0.0695366	6.6661	0.468875	0.989281
ENSG00000010017 (RANBP9)	ENSG00000010017	RANBP9	RAN binding protein 9	-0.0140498	5.15343	0.882571	0.998725
ENSG00000010030 (ETV7)	ENSG00000010030	ETV7	ETS variant transcription factor 7	0.0293472	-0.0966569	0.940318	0.998939
ENSG00000010072 (SPRTN)	ENSG00000010072	SPRTN	SprT-like N-terminal domain	0.0603174	3.31544	0.692247	0.99492
ENSG00000010165 (EEF1AKNMT)	ENSG00000010165	EEF1AKNMT	eEF1A lysine and N-terminal methyltransferase	0.00900022	4.69171	0.930157	0.998939
ENSG00000010219 (DYRK4)	ENSG00000010219	DYRK4	dual specificity tyrosine phosphorylation regulated kinase 4	0.0930708	2.83503	0.520645	0.99492
ENSG00000010244 (ZNF207)	ENSG00000010244	ZNF207	zinc finger protein 207	0.12814	7.30165	0.37603	0.986151
ENSG00000010256 (UQCRC1)	ENSG00000010256	UQCRC1	ubiquinol-cytochrome c reductase core protein 1	-0.102188	7.04293	0.378295	0.98683
ENSG00000010270 (STARD3NL)	ENSG00000010270	STARD3NL	STARD3 N-terminal like	0.104868	4.45488	0.31357	0.97436
ENSG00000010278 (CD9)	ENSG00000010278	CD9	CD9 molecule	-0.17303	6.16853	0.249208	0.955649
ENSG00000010292 (NCAPD2)	ENSG00000010292	NCAPD2	non-SMC condensin I complex subunit D2	-0.0331972	5.05006	0.814641	0.998396
ENSG00000010295 (IFFO1)	ENSG00000010295	IFFO1	intermediate filament family orphan 1	-0.00848189	4.26555	0.962303	0.998939
ENSG00000010310 (GIPR)	ENSG00000010310	GIPR	gastric inhibitory polypeptide receptor	0.173777	0.953009	0.585902	0.99492
ENSG00000010318 (PHF7)	ENSG00000010318	PHF7	PHD finger protein 7	-0.0663157	2.34883	0.707887	0.99492
ENSG00000010319 (SEMA3G)	ENSG00000010319	SEMA3G	semaphorin 3G	0.138029	5.17707	0.614088	0.99492
ENSG00000010322 (NISCH)	ENSG00000010322	NISCH	nischarin	-0.114929	6.7782	0.343679	0.981835
ENSG00000010327 (STAB1)	ENSG00000010327	STAB1	stabilin 1	-0.131681	7.55152	0.596411	0.99492
ENSG00000010361 (FUZ)	ENSG00000010361	FUZ	fuzzy planar cell polarity protein	-0.316139	3.7798	0.0549232	0.828274
ENSG00000010379 (SLC6A13)	ENSG00000010379	SLC6A13	solute carrier family 6 member 13	-0.0755424	7.05342	0.755797	0.995009
ENSG00000010404 (IDS)	ENSG00000010404	IDS	iduronate 2-sulfatase	0.0450367	6.4089	0.714179	0.99492
ENSG00000010539 (ZNF200)	ENSG00000010539	ZNF200	zinc finger protein 200	0.109642	3.00041	0.425368	0.989281
ENSG00000010610 (CD4)	ENSG00000010610	CD4	CD4 molecule	-0.228174	4.34465	0.432947	0.989281
ENSG00000010626 (LRRC23)	ENSG00000010626	LRRC23	leucine rich repeat containing 23	-0.230272	2.82819	0.303942	0.972309
ENSG00000010671 (BTK)	ENSG00000010671	BTK	Bruton tyrosine kinase	0.0227378	1.4803	0.954632	0.998939
ENSG00000010704 (HFE)	ENSG00000010704	HFE	homeostatic iron regulator	-0.252482	3.54268	0.148298	0.917442
ENSG00000010803 (SCMH1)	ENSG00000010803	SCMH1	Scm polycomb group protein homolog 1	0.189945	5.75595	0.171687	0.926446
ENSG00000010810 (FYN)	ENSG00000010810	FYN	FYN proto-oncogene, Src family tyrosine kinase	-0.0414059	4.96409	0.801822	0.998396
ENSG00000010818 (HIVEP2)	ENSG00000010818	HIVEP2	HIVEP zinc finger 2	0.146287	6.25325	0.362546	0.984616
ENSG00000010932 (FMO1)	ENSG00000010932	FMO1	flavin containing dimethylaniline monoxygenase 1	-0.374478	5.86484	0.223202	0.948398
ENSG00000011007 (ELOA)	ENSG00000011007	ELOA	elongin A	0.0727777	5.74311	0.389806	0.98756
ENSG00000011009 (LYPLA2)	ENSG00000011009	LYPLA2	lysophospholipase 2	0.191429	5.51851	0.086471	0.864726
ENSG00000011021 (CLCN6)	ENSG00000011021	CLCN6	chloride voltage-gated channel 6	-0.0540274	5.72211	0.604486	0.99492
ENSG00000011028 (MRC2)	ENSG00000011028	MRC2	mannose receptor C type 2	-0.189616	5.77089	0.407819	0.988956
ENSG00000011052 (NME1-NME2)	ENSG00000011052	NME1-NME2	NME1-NME2 readthrough	0.844756	-0.305566	0.571625	0.99492
ENSG00000011105 (TSPAN9)	ENSG00000011105	TSPAN9	tetraspanin 9	-0.148068	7.01476	0.182741	0.928427
ENSG00000011114 (BTBD7)	ENSG00000011114	BTBD7	BTB domain containing 7	-0.146643	5.09529	0.609461	0.99492
ENSG00000011132 (APBA3)	ENSG00000011132	APBA3	amyloid beta precursor protein binding family A member 3	-0.0534445	4.0965	0.696748	0.99492
ENSG00000011143 (MKS1)	ENSG00000011143	MKS1	MKS transition zone complex subunit 1	-0.02412	3.50664	0.854523	0.998725
ENSG00000011198 (ABHD5)	ENSG00000011198	ABHD5	abhydrolase domain containing 5	0.0654168	4.34189	0.638461	0.99492
ENSG00000011201 (ANOS1)	ENSG00000011201	ANOS1	anosmin 1	0.183497	1.11808	0.53328	0.99492
ENSG00000011243 (AKAP8L)	ENSG00000011243	AKAP8L	A-kinase anchoring protein 8 like	0.12926	6.01144	0.236155	0.953245
ENSG00000011258 (MBTD1)	ENSG00000011258	MBTD1	mbt domain containing 1	-0.0144491	4.60471	0.927194	0.998939
ENSG00000011260 (UTP18)	ENSG00000011260	UTP18	UTP18 small subunit processome component	0.151241	4.18826	0.147686	0.915883
ENSG00000011275 (RNF216)	ENSG00000011275	RNF216	ring finger protein 216	0.0191791	5.71922	0.848661	0.998725
ENSG00000011295 (TTC19)	ENSG00000011295	TTC19	tetratricopeptide repeat domain 19	0.174415	5.44209	0.104976	0.892502
ENSG00000011304 (PTBP1)	ENSG00000011304	PTBP1	polypyrimidine tract binding protein 1	0.0630389	7.30607	0.551114	0.99492
ENSG00000011347 (SYT7)	ENSG00000011347	SYT7	synaptotagmin 7	-0.50845	3.95828	0.169918	0.926446
ENSG00000011376 (LARS2)	ENSG00000011376	LARS2	leucyl-tRNA synthetase 2, mitochondrial	-0.166341	5.49201	0.0896182	0.872816
ENSG00000011405 (PIK3C2A)	ENSG00000011405	PIK3C2A	phosphatidylinositol-4-phosphate 3-kinase catalytic subunit type 2 alpha	0.049851	7.099	0.721864	0.99492
ENSG00000011422 (PLAUR)	ENSG00000011422	PLAUR	plasminogen activator, urokinase receptor	0.407798	2.43905	0.385638	0.98756
ENSG00000011426 (ANLN)	ENSG00000011426	ANLN	anillin actin binding protein	-0.555791	1.44107	0.354742	0.983713
ENSG00000011451 (WIZ)	ENSG00000011451	WIZ	WIZ zinc finger	0.0650256	5.83754	0.5393	0.99492
ENSG00000011454 (RABGAP1)	ENSG00000011454	RABGAP1	RAB GTPase activating protein 1	-0.0115212	6.30497	0.900131	0.998725
ENSG00000011465 (DCN)	ENSG00000011465	DCN	decorin	-0.392991	7.39873	0.124825	0.90314
ENSG00000011478 (QPCTL)	ENSG00000011478	QPCTL	glutaminyl-peptide cyclotransferase like	0.102898	2.36916	0.537726	0.99492
ENSG00000011485 (PPP5C)	ENSG00000011485	PPP5C	protein phosphatase 5 catalytic subunit	0.0811088	5.54657	0.397675	0.987767
ENSG00000011523 (CEP68)	ENSG00000011523	CEP68	centrosomal protein 68	-0.277266	4.85181	0.0413977	0.793125
ENSG00000011566 (MAP4K3)	ENSG00000011566	MAP4K3	mitogen-activated protein kinase kinase kinase kinase 3	0.0355012	5.78517	0.772838	0.997175
ENSG00000011600 (TYROBP)	ENSG00000011600	TYROBP	transmembrane immune signaling adaptor TYROBP	0.00986162	2.89474	0.976394	0.998939
ENSG00000011638 (TMEM159)	ENSG00000011638	TMEM159	transmembrane protein 159	0.0804421	3.73356	0.615078	0.99492
ENSG00000012048 (BRCA1)	ENSG00000012048	BRCA1	BRCA1 DNA repair associated	-0.152826	2.84097	0.413149	0.988956
ENSG00000012061 (ERCC1)	ENSG00000012061	ERCC1	ERCC excision repair 1, endonuclease non-catalytic subunit	0.0982227	5.08783	0.491735	0.994432
ENSG00000012124 (CD22)	ENSG00000012124	CD22	CD22 molecule	0.730567	1.51184	0.14795	0.916078
ENSG00000012171 (SEMA3B)	ENSG00000012171	SEMA3B	semaphorin 3B	-0.216226	6.76043	0.182418	0.928014
ENSG00000012174 (MBTPS2)	ENSG00000012174	MBTPS2	membrane bound transcription factor peptidase, site 2	-0.0242779	4.37014	0.851752	0.998725
ENSG00000012211 (PRICKLE3)	ENSG00000012211	PRICKLE3	prickle planar cell polarity protein 3	0.242819	2.59808	0.115327	0.89684
ENSG00000012223 (LTF)	ENSG00000012223	LTF	lactotransferrin	0.3795	6.99157	0.562186	0.99492
ENSG00000012232 (EXTL3)	ENSG00000012232	EXTL3	exostosin like glycosyltransferase 3	0.0108538	5.66425	0.913578	0.998725
ENSG00000012504 (NR1H4)	ENSG00000012504	NR1H4	nuclear receptor subfamily 1 group H member 4	0.400364	4.75087	0.120886	0.90314
ENSG00000012660 (ELOVL5)	ENSG00000012660	ELOVL5	ELOVL fatty acid elongase 5	0.169488	5.55651	0.159412	0.926069
ENSG00000012779 (ALOX5)	ENSG00000012779	ALOX5	arachidonate 5-lipoxygenase	7.45672	0.222305	0.00203671	0.29576
ENSG00000012817 (KDM5D)	ENSG00000012817	KDM5D	lysine demethylase 5D	0.0664639	5.1738	0.721096	0.99492
ENSG00000012822 (CALCOCO1)	ENSG00000012822	CALCOCO1	calcium binding and coiled-coil domain 1	-0.156208	6.65465	0.244816	0.953581
ENSG00000012963 (UBR7)	ENSG00000012963	UBR7	ubiquitin protein ligase E3 component n-recognin 7 (putative)	0.00336817	4.53725	0.976886	0.998939
ENSG00000012983 (MAP4K5)	ENSG00000012983	MAP4K5	mitogen-activated protein kinase kinase kinase kinase 5	-0.0398591	5.2474	0.751736	0.995009
ENSG00000013016 (EHD3)	ENSG00000013016	EHD3	EH domain containing 3	-0.426179	5.89253	0.184595	0.929403
ENSG00000013275 (PSMC4)	ENSG00000013275	PSMC4	proteasome 26S subunit, ATPase 4	0.282678	5.59457	0.0109337	0.540888
ENSG00000013288 (MAN2B2)	ENSG00000013288	MAN2B2	mannosidase alpha class 2B member 2	-0.0596957	5.91192	0.698841	0.99492
ENSG00000013293 (SLC7A14)	ENSG00000013293	SLC7A14	solute carrier family 7 member 14	0.0433344	0.219408	0.901589	0.998725
ENSG00000013297 (CLDN11)	ENSG00000013297	CLDN11	claudin 11	1.00552	2.48348	0.0413923	0.793125
ENSG00000013306 (SLC25A39)	ENSG00000013306	SLC25A39	solute carrier family 25 member 39	-0.0216532	6.7136	0.899285	0.998725
ENSG00000013364 (MVP)	ENSG00000013364	MVP	major vault protein	0.347491	8.12099	0.0206917	0.653314
ENSG00000013374 (NUB1)	ENSG00000013374	NUB1	negative regulator of ubiquitin like proteins 1	0.106784	5.44047	0.278034	0.968192
ENSG00000013375 (PGM3)	ENSG00000013375	PGM3	phosphoglucomutase 3	0.082043	4.84714	0.544496	0.99492
ENSG00000013392 (RWDD2A)	ENSG00000013392	RWDD2A	RWD domain containing 2A	-0.0715016	2.88605	0.659701	0.99492
ENSG00000013441 (CLK1)	ENSG00000013441	CLK1	CDC like kinase 1	0.0066239	6.09579	0.96315	0.998939
ENSG00000013503 (POLR3B)	ENSG00000013503	POLR3B	RNA polymerase III subunit B	-0.107839	4.12274	0.331583	0.979563
ENSG00000013523 (ANGEL1)	ENSG00000013523	ANGEL1	angel homolog 1	-0.0967222	4.93983	0.389813	0.98756
ENSG00000013561 (RNF14)	ENSG00000013561	RNF14	ring finger protein 14	0.0518894	5.73692	0.698261	0.99492
ENSG00000013563 (DNASE1L1)	ENSG00000013563	DNASE1L1	deoxyribonuclease 1 like 1	0.025011	4.34247	0.836178	0.998725
ENSG00000013573 (DDX11)	ENSG00000013573	DDX11	DEAD/H-box helicase 11	-0.214188	4.35871	0.646281	0.99492
ENSG00000013583 (HEBP1)	ENSG00000013583	HEBP1	heme binding protein 1	-0.0206748	4.5838	0.867757	0.998725
ENSG00000013588 (GPRC5A)	ENSG00000013588	GPRC5A	G protein-coupled receptor class C group 5 member A	0.0271419	4.86734	0.924711	0.998939
ENSG00000013619 (MAMLD1)	ENSG00000013619	MAMLD1	mastermind like domain containing 1	0.0793834	3.53506	0.768415	0.996366
ENSG00000013725 (CD6)	ENSG00000013725	CD6	CD6 molecule	0.253755	1.24933	0.608373	0.99492
ENSG00000013810 (TACC3)	ENSG00000013810	TACC3	transforming acidic coiled-coil containing protein 3	-0.0126625	3.09658	0.964604	0.998939
ENSG00000014123 (UFL1)	ENSG00000014123	UFL1	UFM1 specific ligase 1	0.117625	5.12639	0.341367	0.98101
ENSG00000014138 (POLA2)	ENSG00000014138	POLA2	DNA polymerase alpha 2, accessory subunit	0.297563	3.31526	0.101757	0.887519
ENSG00000014164 (ZC3H3)	ENSG00000014164	ZC3H3	zinc finger CCCH-type containing 3	0.471932	5.08017	0.0533758	0.82259
ENSG00000014216 (CAPN1)	ENSG00000014216	CAPN1	calpain 1	0.0770547	6.88177	0.532122	0.99492
ENSG00000014257 (ACP3)	ENSG00000014257	ACP3	acid phosphatase 3	-0.683861	4.08396	0.0835582	0.864726
ENSG00000014641 (MDH1)	ENSG00000014641	MDH1	malate dehydrogenase 1	-0.0156387	6.7952	0.927047	0.998939
ENSG00000014824 (SLC30A9)	ENSG00000014824	SLC30A9	solute carrier family 30 member 9	0.0427768	6.36425	0.787198	0.998396
ENSG00000014914 (MTMR11)	ENSG00000014914	MTMR11	myotubularin related protein 11	0.133173	5.03743	0.478511	0.989855
ENSG00000014919 (COX15)	ENSG00000014919	COX15	cytochrome c oxidase assembly homolog COX15	-0.0681767	5.33993	0.536859	0.99492
ENSG00000015133 (CCDC88C)	ENSG00000015133	CCDC88C	coiled-coil domain containing 88C	0.0827046	5.47738	0.581771	0.99492
ENSG00000015153 (YAF2)	ENSG00000015153	YAF2	YY1 associated factor 2	0.171616	4.54599	0.263149	0.958853
ENSG00000015171 (ZMYND11)	ENSG00000015171	ZMYND11	zinc finger MYND-type containing 11	0.0213746	6.32398	0.85593	0.998725
ENSG00000015285 (WAS)	ENSG00000015285	WAS	WASP actin nucleation promoting factor	0.12023	2.56311	0.686397	0.99492
ENSG00000015413 (DPEP1)	ENSG00000015413	DPEP1	dipeptidase 1	0.0834118	7.68454	0.74697	0.995009
ENSG00000015475 (BID)	ENSG00000015475	BID	BH3 interacting domain death agonist	-0.0204291	2.25263	0.937622	0.998939
ENSG00000015479 (MATR3)	ENSG00000015479	MATR3	matrin 3	0.0210364	7.64848	0.846446	0.998725
ENSG00000015520 (NPC1L1)	ENSG00000015520	NPC1L1	NPC1 like intracellular cholesterol transporter 1	-1.10459	1.60022	0.0107774	0.540888
ENSG00000015532 (XYLT2)	ENSG00000015532	XYLT2	xylosyltransferase 2	-0.089328	4.75098	0.536767	0.99492
ENSG00000015568 (RGPD5)	ENSG00000015568	RGPD5	RANBP2 like and GRIP domain containing 5	0.00637866	6.62164	0.973702	0.998939
ENSG00000015676 (NUDCD3)	ENSG00000015676	NUDCD3	NudC domain containing 3	-0.0456092	6.11807	0.667781	0.99492
ENSG00000016391 (CHDH)	ENSG00000016391	CHDH	choline dehydrogenase	-0.308147	7.61749	0.123097	0.90314
ENSG00000016864 (GLT8D1)	ENSG00000016864	GLT8D1	glycosyltransferase 8 domain containing 1	0.048128	4.55686	0.663444	0.99492
ENSG00000017260 (ATP2C1)	ENSG00000017260	ATP2C1	ATPase secretory pathway Ca2+ transporting 1	-0.0083199	6.37878	0.945928	0.998939
ENSG00000017427 (IGF1)	ENSG00000017427	IGF1	insulin like growth factor 1	-0.126085	2.80742	0.752703	0.995009
ENSG00000017483 (SLC38A5)	ENSG00000017483	SLC38A5	solute carrier family 38 member 5	0.5194	0.401443	0.34281	0.981072
ENSG00000017797 (RALBP1)	ENSG00000017797	RALBP1	ralA binding protein 1	-0.0976419	6.78499	0.447775	0.989281
ENSG00000018189 (RUFY3)	ENSG00000018189	RUFY3	RUN and FYVE domain containing 3	-0.123958	6.9418	0.496655	0.994874
ENSG00000018236 (CNTN1)	ENSG00000018236	CNTN1	contactin 1	-0.800841	4.35186	0.0144569	0.600015
ENSG00000018280 (SLC11A1)	ENSG00000018280	SLC11A1	solute carrier family 11 member 1	0.982676	3.62725	0.0199158	0.653314
ENSG00000018408 (WWTR1)	ENSG00000018408	WWTR1	WW domain containing transcription regulator 1	-0.0312236	6.82979	0.750227	0.995009
ENSG00000018510 (AGPS)	ENSG00000018510	AGPS	alkylglycerone phosphate synthase	0.0201839	5.66887	0.892742	0.998725
ENSG00000018610 (CXorf56)	ENSG00000018610	CXorf56	chromosome X open reading frame 56	0.107729	3.94587	0.325082	0.978328
ENSG00000018625 (ATP1A2)	ENSG00000018625	ATP1A2	ATPase Na+/K+ transporting subunit alpha 2	0.206118	3.93002	0.562386	0.99492
ENSG00000018699 (TTC27)	ENSG00000018699	TTC27	tetratricopeptide repeat domain 27	0.0760027	3.79699	0.586413	0.99492
ENSG00000018869 (ZNF582)	ENSG00000018869	ZNF582	zinc finger protein 582	0.135713	2.04464	0.540036	0.99492
ENSG00000019102 (VSIG2)	ENSG00000019102	VSIG2	V-set and immunoglobulin domain containing 2	-0.238724	1.24677	0.376256	0.986174
ENSG00000019144 (PHLDB1)	ENSG00000019144	PHLDB1	pleckstrin homology like domain family B member 1	0.400055	7.61706	0.0193088	0.651103
ENSG00000019169 (MARCO)	ENSG00000019169	MARCO	macrophage receptor with collagenous structure	1.73357	0.637361	0.0656113	0.845644
ENSG00000019186 (CYP24A1)	ENSG00000019186	CYP24A1	cytochrome P450 family 24 subfamily A member 1	-0.312823	6.07877	0.677583	0.99492
ENSG00000019485 (PRDM11)	ENSG00000019485	PRDM11	PR/SET domain 11	0.111308	4.89226	0.451331	0.989281
ENSG00000019505 (SYT13)	ENSG00000019505	SYT13	synaptotagmin 13	-0.468831	4.97771	0.0584756	0.83195
ENSG00000019549 (SNAI2)	ENSG00000019549	SNAI2	snail family transcriptional repressor 2	0.283089	4.03095	0.32522	0.978328
ENSG00000019582 (CD74)	ENSG00000019582	CD74	CD74 molecule	0.150926	9.25914	0.554842	0.99492
ENSG00000019991 (HGF)	ENSG00000019991	HGF	hepatocyte growth factor	-0.234744	4.99805	0.353967	0.983713
ENSG00000019995 (ZRANB1)	ENSG00000019995	ZRANB1	zinc finger RANBP2-type containing 1	-0.0525974	5.34453	0.612787	0.99492
ENSG00000020129 (NCDN)	ENSG00000020129	NCDN	neurochondrin	-0.0615772	4.5801	0.571067	0.99492
ENSG00000020181 (ADGRA2)	ENSG00000020181	ADGRA2	adhesion G protein-coupled receptor A2	-0.378708	5.10477	0.086665	0.864726
ENSG00000020256 (ZFP64)	ENSG00000020256	ZFP64	ZFP64 zinc finger protein	-0.0882277	3.93358	0.473773	0.989281
ENSG00000020426 (MNAT1)	ENSG00000020426	MNAT1	MNAT1 component of CDK activating kinase	0.0593312	3.80614	0.667093	0.99492
ENSG00000020577 (SAMD4A)	ENSG00000020577	SAMD4A	sterile alpha motif domain containing 4A	0.141103	5.69702	0.572465	0.99492
ENSG00000020633 (RUNX3)	ENSG00000020633	RUNX3	RUNX family transcription factor 3	0.290549	1.7571	0.555026	0.99492
ENSG00000020922 (MRE11)	ENSG00000020922	MRE11	MRE11 homolog, double strand break repair nuclease	0.0568966	4.65069	0.712249	0.99492
ENSG00000021300 (PLEKHB1)	ENSG00000021300	PLEKHB1	pleckstrin homology domain containing B1	-0.476036	3.35318	0.0148333	0.600015
ENSG00000021355 (SERPINB1)	ENSG00000021355	SERPINB1	serpin family B member 1	0.263177	5.10109	0.0646727	0.845644
ENSG00000021461 (CYP3A43)	ENSG00000021461	CYP3A43	cytochrome P450 family 3 subfamily A member 43	0.378135	-0.613448	0.233719	0.953245
ENSG00000021488 (SLC7A9)	ENSG00000021488	SLC7A9	solute carrier family 7 member 9	0.000553329	4.8396	0.997728	0.999246
ENSG00000021574 (SPAST)	ENSG00000021574	SPAST	spastin	0.127225	4.08196	0.355088	0.983713
ENSG00000021645 (NRXN3)	ENSG00000021645	NRXN3	neurexin 3	0.35225	3.25532	0.156967	0.924145
ENSG00000021762 (OSBPL5)	ENSG00000021762	OSBPL5	oxysterol binding protein like 5	0.0680303	4.88433	0.594929	0.99492
ENSG00000021776 (AQR)	ENSG00000021776	AQR	aquarius intron-binding spliceosomal factor	0.062514	6.03707	0.600112	0.99492
ENSG00000021826 (CPS1)	ENSG00000021826	CPS1	carbamoyl-phosphate synthase 1	-0.0575174	3.18845	0.781184	0.997994
ENSG00000022267 (FHL1)	ENSG00000022267	FHL1	four and a half LIM domains 1	-0.195791	5.10861	0.375422	0.986109
ENSG00000022277 (RTF2)	ENSG00000022277	RTF2	replication termination factor 2	0.0752833	5.53729	0.396841	0.987767
ENSG00000022556 (NLRP2)	ENSG00000022556	NLRP2	NLR family pyrin domain containing 2	3.20173	-0.323804	0.219005	0.947537
ENSG00000022567 (SLC45A4)	ENSG00000022567	SLC45A4	solute carrier family 45 member 4	-0.667591	5.9932	0.0100771	0.532897
ENSG00000022840 (RNF10)	ENSG00000022840	RNF10	ring finger protein 10	-0.0415434	7.33252	0.634354	0.99492
ENSG00000022976 (ZNF839)	ENSG00000022976	ZNF839	zinc finger protein 839	0.000134625	4.08275	0.998953	0.999654
ENSG00000023041 (ZDHHC6)	ENSG00000023041	ZDHHC6	zinc finger DHHC-type palmitoyltransferase 6	0.0763656	5.66573	0.678032	0.99492
ENSG00000023171 (GRAMD1B)	ENSG00000023171	GRAMD1B	GRAM domain containing 1B	-0.0939958	6.03324	0.807008	0.998396
ENSG00000023191 (RNH1)	ENSG00000023191	RNH1	ribonuclease/angiogenin inhibitor 1	0.160901	6.52461	0.165974	0.926446
ENSG00000023228 (NDUFS1)	ENSG00000023228	NDUFS1	NADH:ubiquinone oxidoreductase core subunit S1	-0.234402	7.97768	0.0677262	0.850987
ENSG00000023287 (RB1CC1)	ENSG00000023287	RB1CC1	RB1 inducible coiled-coil 1	0.0442481	6.16909	0.708175	0.99492
ENSG00000023318 (ERP44)	ENSG00000023318	ERP44	endoplasmic reticulum protein 44	0.127319	5.38856	0.261755	0.957807
ENSG00000023330 (ALAS1)	ENSG00000023330	ALAS1	5'-aminolevulinate synthase 1	0.0637795	5.56236	0.627962	0.99492
ENSG00000023445 (BIRC3)	ENSG00000023445	BIRC3	baculoviral IAP repeat containing 3	0.289383	4.81928	0.403033	0.987767
ENSG00000023516 (AKAP11)	ENSG00000023516	AKAP11	A-kinase anchoring protein 11	0.0378632	6.88868	0.746496	0.995009
ENSG00000023572 (GLRX2)	ENSG00000023572	GLRX2	glutaredoxin 2	0.0409064	3.4152	0.805937	0.998396
ENSG00000023608 (SNAPC1)	ENSG00000023608	SNAPC1	small nuclear RNA activating complex polypeptide 1	0.230952	2.77319	0.212208	0.9443
ENSG00000023697 (DERA)	ENSG00000023697	DERA	deoxyribose-phosphate aldolase	0.102692	4.90328	0.50743	0.99492
ENSG00000023734 (STRAP)	ENSG00000023734	STRAP	serine/threonine kinase receptor associated protein	0.101756	5.91879	0.322045	0.976878
ENSG00000023839 (ABCC2)	ENSG00000023839	ABCC2	ATP binding cassette subfamily C member 2	0.0024067	6.40146	0.991344	0.998939
ENSG00000023892 (DEF6)	ENSG00000023892	DEF6	DEF6 guanine nucleotide exchange factor	0.0696297	2.05178	0.857932	0.998725
ENSG00000023902 (PLEKHO1)	ENSG00000023902	PLEKHO1	pleckstrin homology domain containing O1	0.0274118	4.21166	0.910149	0.998725
ENSG00000023909 (GCLM)	ENSG00000023909	GCLM	glutamate-cysteine ligase modifier subunit	0.334385	4.59226	0.0939386	0.875335
ENSG00000024048 (UBR2)	ENSG00000024048	UBR2	ubiquitin protein ligase E3 component n-recognin 2	0.00713843	6.6831	0.949825	0.998939
ENSG00000024422 (EHD2)	ENSG00000024422	EHD2	EH domain containing 2	-0.0560516	5.81068	0.755875	0.995009
ENSG00000024862 (CCDC28A)	ENSG00000024862	CCDC28A	coiled-coil domain containing 28A	-0.0291828	3.91	0.856521	0.998725
ENSG00000025039 (RRAGD)	ENSG00000025039	RRAGD	Ras related GTP binding D	-0.312998	6.2216	0.184284	0.928847
ENSG00000025156 (HSF2)	ENSG00000025156	HSF2	heat shock transcription factor 2	0.0434385	2.66157	0.793054	0.998396
ENSG00000025293 (PHF20)	ENSG00000025293	PHF20	PHD finger protein 20	-0.0369844	5.48295	0.71506	0.99492
ENSG00000025423 (HSD17B6)	ENSG00000025423	HSD17B6	hydroxysteroid 17-beta dehydrogenase 6	-0.655671	0.0441065	0.157326	0.924379
ENSG00000025434 (NR1H3)	ENSG00000025434	NR1H3	nuclear receptor subfamily 1 group H member 3	-0.208912	4.23031	0.172455	0.926446
ENSG00000025708 (TYMP)	ENSG00000025708	TYMP	thymidine phosphorylase	0.964827	5.21484	0.0101707	0.53521
ENSG00000025770 (NCAPH2)	ENSG00000025770	NCAPH2	non-SMC condensin II complex subunit H2	0.0708615	4.50117	0.581945	0.99492
ENSG00000025772 (TOMM34)	ENSG00000025772	TOMM34	translocase of outer mitochondrial membrane 34	-0.0144193	4.06864	0.910567	0.998725
ENSG00000025796 (SEC63)	ENSG00000025796	SEC63	SEC63 homolog, protein translocation regulator	0.12105	6.15532	0.351109	0.983375
ENSG00000025800 (KPNA6)	ENSG00000025800	KPNA6	karyopherin subunit alpha 6	0.0313574	7.02403	0.721512	0.99492
ENSG00000026025 (VIM)	ENSG00000026025	VIM	vimentin	0.138087	8.29806	0.602692	0.99492
ENSG00000026036 (RTEL1-TNFRSF6B)	ENSG00000026036	RTEL1-TNFRSF6B	RTEL1-TNFRSF6B readthrough (NMD candidate)	0.264767	4.39635	0.0770765	0.85859
ENSG00000026103 (FAS)	ENSG00000026103	FAS	Fas cell surface death receptor	0.249039	3.81422	0.386265	0.98756
ENSG00000026297 (RNASET2)	ENSG00000026297	RNASET2	ribonuclease T2	-0.152369	4.57201	0.54316	0.99492
ENSG00000026508 (CD44)	ENSG00000026508	CD44	CD44 molecule (Indian blood group)	0.0470573	5.86052	0.894461	0.998725
ENSG00000026559 (KCNG1)	ENSG00000026559	KCNG1	potassium voltage-gated channel modifier subfamily G member 1	0.0153625	0.400564	0.949171	0.998939
ENSG00000026652 (AGPAT4)	ENSG00000026652	AGPAT4	1-acylglycerol-3-phosphate O-acyltransferase 4	-0.320819	4.28142	0.215954	0.945496
ENSG00000026751 (SLAMF7)	ENSG00000026751	SLAMF7	SLAM family member 7	0.442708	1.58161	0.495683	0.994432
ENSG00000026950 (BTN3A1)	ENSG00000026950	BTN3A1	butyrophilin subfamily 3 member A1	-0.19008	4.27865	0.490367	0.994432
ENSG00000027001 (MIPEP)	ENSG00000027001	MIPEP	mitochondrial intermediate peptidase	0.147022	4.70497	0.203702	0.940525
ENSG00000027075 (PRKCH)	ENSG00000027075	PRKCH	protein kinase C eta	0.101498	4.59207	0.532042	0.99492
ENSG00000027644 (INSRR)	ENSG00000027644	INSRR	insulin receptor related receptor	-0.0633469	3.62046	0.850859	0.998725
ENSG00000027697 (IFNGR1)	ENSG00000027697	IFNGR1	interferon gamma receptor 1	0.0290992	5.15131	0.832561	0.998725
ENSG00000027847 (B4GALT7)	ENSG00000027847	B4GALT7	beta-1,4-galactosyltransferase 7	0.162364	4.04669	0.201168	0.939677
ENSG00000027869 (SH2D2A)	ENSG00000027869	SH2D2A	SH2 domain containing 2A	0.490041	0.639198	0.21413	0.945496
ENSG00000028116 (VRK2)	ENSG00000028116	VRK2	VRK serine/threonine kinase 2	0.211402	3.64838	0.115148	0.89684
ENSG00000028137 (TNFRSF1B)	ENSG00000028137	TNFRSF1B	TNF receptor superfamily member 1B	0.0930771	4.42548	0.70868	0.99492
ENSG00000028203 (VEZT)	ENSG00000028203	VEZT	vezatin, adherens junctions transmembrane protein	0.127343	5.58325	0.194666	0.933408
ENSG00000028277 (POU2F2)	ENSG00000028277	POU2F2	POU class 2 homeobox 2	-0.20072	2.5985	0.624673	0.99492
ENSG00000028310 (BRD9)	ENSG00000028310	BRD9	bromodomain containing 9	-0.038003	5.439	0.771561	0.996797
ENSG00000028528 (SNX1)	ENSG00000028528	SNX1	sorting nexin 1	-0.0253312	7.17795	0.83537	0.998725
ENSG00000028839 (TBPL1)	ENSG00000028839	TBPL1	TATA-box binding protein like 1	-0.00287062	2.76187	0.987771	0.998939
ENSG00000029153 (ARNTL2)	ENSG00000029153	ARNTL2	aryl hydrocarbon receptor nuclear translocator like 2	0.298579	1.81932	0.41664	0.988956
ENSG00000029363 (BCLAF1)	ENSG00000029363	BCLAF1	BCL2 associated transcription factor 1	0.0690336	6.93816	0.587482	0.99492
ENSG00000029364 (SLC39A9)	ENSG00000029364	SLC39A9	solute carrier family 39 member 9	0.0670075	6.54892	0.57387	0.99492
ENSG00000029534 (ANK1)	ENSG00000029534	ANK1	ankyrin 1	0.0874283	1.72075	0.74642	0.995009
ENSG00000029639 (TFB1M)	ENSG00000029639	TFB1M	transcription factor B1, mitochondrial	-0.0540462	3.30254	0.684586	0.99492
ENSG00000029725 (RABEP1)	ENSG00000029725	RABEP1	rabaptin, RAB GTPase binding effector protein 1	-0.00842102	6.02047	0.936309	0.998939
ENSG00000029993 (HMGB3)	ENSG00000029993	HMGB3	high mobility group box 3	0.0724858	3.58861	0.702668	0.99492
ENSG00000030066 (NUP160)	ENSG00000030066	NUP160	nucleoporin 160	0.0147747	5.51832	0.899956	0.998725
ENSG00000030110 (BAK1)	ENSG00000030110	BAK1	BCL2 antagonist/killer 1	0.095712	3.77742	0.506031	0.99492
ENSG00000030419 (IKZF2)	ENSG00000030419	IKZF2	IKAROS family zinc finger 2	-0.121538	3.60771	0.632927	0.99492
ENSG00000030582 (GRN)	ENSG00000030582	GRN	granulin precursor	0.296677	7.18605	0.0406711	0.791286
ENSG00000031003 (FAM13B)	ENSG00000031003	FAM13B	family with sequence similarity 13 member B	-0.0232831	5.70189	0.850638	0.998725
ENSG00000031081 (ARHGAP31)	ENSG00000031081	ARHGAP31	Rho GTPase activating protein 31	-0.050081	5.90571	0.622529	0.99492
ENSG00000031691 (CENPQ)	ENSG00000031691	CENPQ	centromere protein Q	-0.188961	0.575268	0.420214	0.989281
ENSG00000031698 (SARS1)	ENSG00000031698	SARS1	seryl-tRNA synthetase 1	0.0336308	5.96879	0.693581	0.99492
ENSG00000031823 (RANBP3)	ENSG00000031823	RANBP3	RAN binding protein 3	0.0312773	5.38105	0.751611	0.995009
ENSG00000032219 (ARID4A)	ENSG00000032219	ARID4A	AT-rich interaction domain 4A	-0.16045	5.39833	0.196826	0.935124
ENSG00000032389 (EIPR1)	ENSG00000032389	EIPR1	EARP complex and GARP complex interacting protein 1	0.0691196	4.51296	0.567271	0.99492
ENSG00000032444 (PNPLA6)	ENSG00000032444	PNPLA6	patatin like phospholipase domain containing 6	0.164098	6.49629	0.132558	0.903655
ENSG00000032742 (IFT88)	ENSG00000032742	IFT88	intraflagellar transport 88	0.0912282	5.14784	0.562532	0.99492
ENSG00000033011 (ALG1)	ENSG00000033011	ALG1	ALG1 chitobiosyldiphosphodolichol beta-mannosyltransferase	0.160877	4.21871	0.130868	0.90314
ENSG00000033030 (ZCCHC8)	ENSG00000033030	ZCCHC8	zinc finger CCHC-type containing 8	0.0283934	4.58189	0.813436	0.998396
ENSG00000033050 (ABCF2)	ENSG00000033050	ABCF2	ATP binding cassette subfamily F member 2	0.385695	4.77168	0.0076565	0.487741
ENSG00000033100 (CHPF2)	ENSG00000033100	CHPF2	chondroitin polymerizing factor 2	0.249123	5.46614	0.0756782	0.856894
ENSG00000033122 (LRRC7)	ENSG00000033122	LRRC7	leucine rich repeat containing 7	0.118476	2.308	0.567853	0.99492
ENSG00000033170 (FUT8)	ENSG00000033170	FUT8	fucosyltransferase 8	0.239991	4.27421	0.120698	0.90314
ENSG00000033178 (UBA6)	ENSG00000033178	UBA6	ubiquitin like modifier activating enzyme 6	0.0422251	5.43231	0.749838	0.995009
ENSG00000033327 (GAB2)	ENSG00000033327	GAB2	GRB2 associated binding protein 2	-0.158149	5.21786	0.379471	0.98683
ENSG00000033627 (ATP6V0A1)	ENSG00000033627	ATP6V0A1	ATPase H+ transporting V0 subunit a1	0.154394	7.35249	0.207917	0.943542
ENSG00000033800 (PIAS1)	ENSG00000033800	PIAS1	protein inhibitor of activated STAT 1	0.132951	5.6989	0.38373	0.987212
ENSG00000033867 (SLC4A7)	ENSG00000033867	SLC4A7	solute carrier family 4 member 7	0.153119	5.37672	0.631988	0.99492
ENSG00000034053 (APBA2)	ENSG00000034053	APBA2	amyloid beta precursor protein binding family A member 2	0.42189	0.103046	0.444343	0.989281
ENSG00000034152 (MAP2K3)	ENSG00000034152	MAP2K3	mitogen-activated protein kinase kinase 3	-0.123139	5.21462	0.515091	0.99492
ENSG00000034510 (TMSB10)	ENSG00000034510	TMSB10	thymosin beta 10	0.312526	7.47451	0.100288	0.883874
ENSG00000034533 (ASTE1)	ENSG00000034533	ASTE1	asteroid homolog 1	-0.0752659	2.34023	0.677318	0.99492
ENSG00000034677 (RNF19A)	ENSG00000034677	RNF19A	ring finger protein 19A, RBR E3 ubiquitin protein ligase	-0.0157672	6.4135	0.895492	0.998725
ENSG00000034693 (PEX3)	ENSG00000034693	PEX3	peroxisomal biogenesis factor 3	0.106157	3.86112	0.469437	0.989281
ENSG00000034713 (GABARAPL2)	ENSG00000034713	GABARAPL2	GABA type A receptor associated protein like 2	-0.068183	5.20259	0.55501	0.99492
ENSG00000035115 (SH3YL1)	ENSG00000035115	SH3YL1	SH3 and SYLF domain containing 1	-0.0188195	6.6247	0.939395	0.998939
ENSG00000035141 (FAM136A)	ENSG00000035141	FAM136A	family with sequence similarity 136 member A	0.146599	4.40063	0.150193	0.918831
ENSG00000035403 (VCL)	ENSG00000035403	VCL	vinculin	0.045592	7.52566	0.730929	0.99492
ENSG00000035499 (DEPDC1B)	ENSG00000035499	DEPDC1B	DEP domain containing 1B	-0.0404069	1.71495	0.929118	0.998939
ENSG00000035664 (DAPK2)	ENSG00000035664	DAPK2	death associated protein kinase 2	-0.812745	3.15275	0.00696101	0.470477
ENSG00000035681 (NSMAF)	ENSG00000035681	NSMAF	neutral sphingomyelinase activation associated factor	0.159422	4.37685	0.300639	0.971768
ENSG00000035687 (ADSS2)	ENSG00000035687	ADSS2	adenylosuccinate synthase 2	0.0171124	4.99362	0.904252	0.998725
ENSG00000035720 (STAP1)	ENSG00000035720	STAP1	signal transducing adaptor family member 1	0.750149	3.01216	0.0939122	0.875335
ENSG00000035862 (TIMP2)	ENSG00000035862	TIMP2	TIMP metallopeptidase inhibitor 2	-0.406825	7.45885	0.0152055	0.604532
ENSG00000035928 (RFC1)	ENSG00000035928	RFC1	replication factor C subunit 1	0.0153203	5.78235	0.855472	0.998725
ENSG00000036054 (TBC1D23)	ENSG00000036054	TBC1D23	TBC1 domain family member 23	0.0308389	4.77873	0.816661	0.998725
ENSG00000036257 (CUL3)	ENSG00000036257	CUL3	cullin 3	0.0631445	6.21549	0.591141	0.99492
ENSG00000036448 (MYOM2)	ENSG00000036448	MYOM2	myomesin 2	-0.426821	3.01374	0.177888	0.926446
ENSG00000036530 (CYP46A1)	ENSG00000036530	CYP46A1	cytochrome P450 family 46 subfamily A member 1	-0.17097	2.25965	0.394447	0.98756
ENSG00000036549 (ZZZ3)	ENSG00000036549	ZZZ3	zinc finger ZZ-type containing 3	-0.0679635	5.93916	0.527912	0.99492
ENSG00000036672 (USP2)	ENSG00000036672	USP2	ubiquitin specific peptidase 2	0.165587	6.6084	0.623436	0.99492
ENSG00000036828 (CASR)	ENSG00000036828	CASR	calcium sensing receptor	-0.615383	6.01867	0.135081	0.905272
ENSG00000037042 (TUBG2)	ENSG00000037042	TUBG2	tubulin gamma 2	-0.0248837	4.55194	0.856594	0.998725
ENSG00000037241 (RPL26L1)	ENSG00000037241	RPL26L1	ribosomal protein L26 like 1	0.188019	2.8047	0.225879	0.948602
ENSG00000037280 (FLT4)	ENSG00000037280	FLT4	fms related tyrosine kinase 4	-0.141362	5.64536	0.518967	0.99492
ENSG00000037474 (NSUN2)	ENSG00000037474	NSUN2	NOP2/Sun RNA methyltransferase 2	0.104126	5.36927	0.352673	0.983375
ENSG00000037637 (FBXO42)	ENSG00000037637	FBXO42	F-box protein 42	-0.0714431	5.25013	0.463102	0.989281
ENSG00000037749 (MFAP3)	ENSG00000037749	MFAP3	microfibril associated protein 3	-0.00141248	4.42538	0.991372	0.998939
ENSG00000037757 (MRI1)	ENSG00000037757	MRI1	methylthioribose-1-phosphate isomerase 1	0.0415218	5.11708	0.836915	0.998725
ENSG00000037897 (METTL1)	ENSG00000037897	METTL1	methyltransferase like 1	0.213057	3.5359	0.377571	0.986646
ENSG00000037965 (HOXC8)	ENSG00000037965	HOXC8	homeobox C8	0.250476	3.37838	0.092397	0.874076
ENSG00000038002 (AGA)	ENSG00000038002	AGA	aspartylglucosaminidase	0.187023	3.02335	0.308388	0.973573
ENSG00000038210 (PI4K2B)	ENSG00000038210	PI4K2B	phosphatidylinositol 4-kinase type 2 beta	0.0641555	4.01313	0.683603	0.99492
ENSG00000038219 (BOD1L1)	ENSG00000038219	BOD1L1	biorientation of chromosomes in cell division 1 like 1	0.110653	7.09531	0.238301	0.953502
ENSG00000038274 (MAT2B)	ENSG00000038274	MAT2B	methionine adenosyltransferase 2B	-0.0294634	5.53877	0.837643	0.998725
ENSG00000038295 (TLL1)	ENSG00000038295	TLL1	tolloid like 1	-0.262228	2.78755	0.28613	0.971453
ENSG00000038358 (EDC4)	ENSG00000038358	EDC4	enhancer of mRNA decapping 4	0.0575426	5.53827	0.55559	0.99492
ENSG00000038382 (TRIO)	ENSG00000038382	TRIO	trio Rho guanine nucleotide exchange factor	0.0991901	7.38642	0.544216	0.99492
ENSG00000038427 (VCAN)	ENSG00000038427	VCAN	versican	0.492215	6.51696	0.325154	0.978328
ENSG00000038532 (CLEC16A)	ENSG00000038532	CLEC16A	C-type lectin domain containing 16A	0.102991	6.42674	0.278873	0.968573
ENSG00000038945 (MSR1)	ENSG00000038945	MSR1	macrophage scavenger receptor 1	0.0572856	3.90924	0.747606	0.995009
ENSG00000039068 (CDH1)	ENSG00000039068	CDH1	cadherin 1	-0.171393	6.9133	0.252578	0.955813
ENSG00000039123 (MTREX)	ENSG00000039123	MTREX	Mtr4 exosome RNA helicase	0.0246353	5.8083	0.824085	0.998725
ENSG00000039139 (DNAH5)	ENSG00000039139	DNAH5	dynein axonemal heavy chain 5	-0.346001	3.78286	0.377898	0.986742
ENSG00000039319 (ZFYVE16)	ENSG00000039319	ZFYVE16	zinc finger FYVE-type containing 16	-0.112141	6.04156	0.451595	0.989281
ENSG00000039523 (RIPOR1)	ENSG00000039523	RIPOR1	RHO family interacting cell polarization regulator 1	0.106674	7.25915	0.541821	0.99492
ENSG00000039537 (C6)	ENSG00000039537	C6	complement C6	0.645638	4.44773	0.176552	0.926446
ENSG00000039560 (RAI14)	ENSG00000039560	RAI14	retinoic acid induced 14	0.0298395	5.8555	0.815363	0.998396
ENSG00000039650 (PNKP)	ENSG00000039650	PNKP	polynucleotide kinase 3'-phosphatase	0.116955	5.37524	0.432441	0.989281
ENSG00000040199 (PHLPP2)	ENSG00000040199	PHLPP2	PH domain and leucine rich repeat protein phosphatase 2	0.122422	5.05504	0.347354	0.983375
ENSG00000040275 (SPDL1)	ENSG00000040275	SPDL1	spindle apparatus coiled-coil protein 1	0.19476	2.43811	0.290745	0.971453
ENSG00000040341 (STAU2)	ENSG00000040341	STAU2	staufen double-stranded RNA binding protein 2	-0.0167002	5.50887	0.870351	0.998725
ENSG00000040487 (SLC66A1)	ENSG00000040487	SLC66A1	solute carrier family 66 member 1	0.0834914	3.57484	0.521512	0.99492
ENSG00000040531 (CTNS)	ENSG00000040531	CTNS	cystinosin, lysosomal cystine transporter	0.142052	4.60796	0.279343	0.968573
ENSG00000040608 (RTN4R)	ENSG00000040608	RTN4R	reticulon 4 receptor	-0.346381	-0.232964	0.464387	0.989281
ENSG00000040633 (PHF23)	ENSG00000040633	PHF23	PHD finger protein 23	0.23168	4.86499	0.0229683	0.682961
ENSG00000040933 (INPP4A)	ENSG00000040933	INPP4A	inositol polyphosphate-4-phosphatase type I A	0.15262	5.41297	0.347447	0.983375
ENSG00000041353 (RAB27B)	ENSG00000041353	RAB27B	RAB27B, member RAS oncogene family	-0.184733	0.235493	0.742021	0.995009
ENSG00000041357 (PSMA4)	ENSG00000041357	PSMA4	proteasome 20S subunit alpha 4	0.2625	5.07733	0.025437	0.697571
ENSG00000041515 (MYO16)	ENSG00000041515	MYO16	myosin XVI	0.346303	-0.0801643	0.462198	0.989281
ENSG00000041802 (LSG1)	ENSG00000041802	LSG1	large 60S subunit nuclear export GTPase 1	0.0302514	5.2158	0.852148	0.998725
ENSG00000041880 (PARP3)	ENSG00000041880	PARP3	poly(ADP-ribose) polymerase family member 3	-0.0138963	4.62291	0.897303	0.998725
ENSG00000041982 (TNC)	ENSG00000041982	TNC	tenascin C	1.17793	7.15589	0.02849	0.723788
ENSG00000041988 (THAP3)	ENSG00000041988	THAP3	THAP domain containing 3	-0.240291	3.19488	0.104125	0.892502
ENSG00000042062 (RIPOR3)	ENSG00000042062	RIPOR3	RIPOR family member 3	-0.636211	5.78733	0.0520668	0.819875
ENSG00000042088 (TDP1)	ENSG00000042088	TDP1	tyrosyl-DNA phosphodiesterase 1	0.145331	3.54675	0.287467	0.971453
ENSG00000042286 (AIFM2)	ENSG00000042286	AIFM2	apoptosis inducing factor mitochondria associated 2	0.186187	4.2595	0.210705	0.944285
ENSG00000042317 (SPATA7)	ENSG00000042317	SPATA7	spermatogenesis associated 7	0.0681274	3.69839	0.645617	0.99492
ENSG00000042429 (MED17)	ENSG00000042429	MED17	mediator complex subunit 17	-0.00934616	4.73664	0.944621	0.998939
ENSG00000042445 (RETSAT)	ENSG00000042445	RETSAT	retinol saturase	0.558712	6.42176	3.77e-05	0.0407423
ENSG00000042493 (CAPG)	ENSG00000042493	CAPG	capping actin protein, gelsolin like	-0.239089	5.42674	0.25952	0.957807
ENSG00000042753 (AP2S1)	ENSG00000042753	AP2S1	adaptor related protein complex 2 subunit sigma 1	0.281648	4.67704	0.0338051	0.758133
ENSG00000042781 (USH2A)	ENSG00000042781	USH2A	usherin	-0.668853	0.254307	0.128624	0.90314
ENSG00000042832 (TG)	ENSG00000042832	TG	thyroglobulin	0.0424909	3.55746	0.862055	0.998725
ENSG00000042980 (ADAM28)	ENSG00000042980	ADAM28	ADAM metallopeptidase domain 28	-0.309487	3.53514	0.244761	0.953581
ENSG00000043039 (BARX2)	ENSG00000043039	BARX2	BARX homeobox 2	-0.126507	2.64652	0.669687	0.99492
ENSG00000043093 (DCUN1D1)	ENSG00000043093	DCUN1D1	defective in cullin neddylation 1 domain containing 1	-0.0681519	5.10842	0.719402	0.99492
ENSG00000043143 (JADE2)	ENSG00000043143	JADE2	jade family PHD finger 2	-0.0757974	6.37589	0.644181	0.99492
ENSG00000043462 (LCP2)	ENSG00000043462	LCP2	lymphocyte cytosolic protein 2	0.153271	3.57226	0.565801	0.99492
ENSG00000043514 (TRIT1)	ENSG00000043514	TRIT1	tRNA isopentenyltransferase 1	0.23275	3.97886	0.0511272	0.819824
ENSG00000043591 (ADRB1)	ENSG00000043591	ADRB1	adrenoceptor beta 1	-0.182206	1.61489	0.593973	0.99492
ENSG00000044090 (CUL7)	ENSG00000044090	CUL7	cullin 7	0.00720277	5.70494	0.945854	0.998939
ENSG00000044115 (CTNNA1)	ENSG00000044115	CTNNA1	catenin alpha 1	0.0353165	8.36067	0.70679	0.99492
ENSG00000044446 (PHKA2)	ENSG00000044446	PHKA2	phosphorylase kinase regulatory subunit alpha 2	-0.00990764	5.34918	0.922076	0.998939
ENSG00000044459 (CNTLN)	ENSG00000044459	CNTLN	centlein	-0.00159315	4.28762	0.99216	0.998939
ENSG00000044524 (EPHA3)	ENSG00000044524	EPHA3	EPH receptor A3	-0.147223	2.04936	0.761404	0.995009
ENSG00000044574 (HSPA5)	ENSG00000044574	HSPA5	heat shock protein family A (Hsp70) member 5	-0.0257882	8.39902	0.914013	0.998725
ENSG00000046604 (DSG2)	ENSG00000046604	DSG2	desmoglein 2	-0.0864528	6.73697	0.572331	0.99492
ENSG00000046647 (GEMIN8)	ENSG00000046647	GEMIN8	gem nuclear organelle associated protein 8	0.140663	3.59718	0.229123	0.949561
ENSG00000046651 (OFD1)	ENSG00000046651	OFD1	OFD1 centriole and centriolar satellite protein	0.0345878	5.21227	0.787384	0.998396
ENSG00000046653 (GPM6B)	ENSG00000046653	GPM6B	glycoprotein M6B	-0.0701787	2.82084	0.810525	0.998396
ENSG00000046889 (PREX2)	ENSG00000046889	PREX2	phosphatidylinositol-3,4,5-trisphosphate dependent Rac exchange factor 2	-0.128517	4.61476	0.48631	0.993598
ENSG00000047056 (WDR37)	ENSG00000047056	WDR37	WD repeat domain 37	0.103319	5.10056	0.252409	0.955813
ENSG00000047188 (YTHDC2)	ENSG00000047188	YTHDC2	YTH domain containing 2	0.128791	5.706	0.263141	0.958853
ENSG00000047230 (CTPS2)	ENSG00000047230	CTPS2	CTP synthase 2	-0.160849	4.0884	0.298434	0.971768
ENSG00000047249 (ATP6V1H)	ENSG00000047249	ATP6V1H	ATPase H+ transporting V1 subunit H	0.100831	5.69523	0.409242	0.988956
ENSG00000047315 (POLR2B)	ENSG00000047315	POLR2B	RNA polymerase II subunit B	0.0762	6.06622	0.439135	0.989281
ENSG00000047346 (FAM214A)	ENSG00000047346	FAM214A	family with sequence similarity 214 member A	0.0472773	5.5158	0.762134	0.995009
ENSG00000047365 (ARAP2)	ENSG00000047365	ARAP2	ArfGAP with RhoGAP domain, ankyrin repeat and PH domain 2	0.0174229	5.18925	0.890842	0.998725
ENSG00000047410 (TPR)	ENSG00000047410	TPR	translocated promoter region, nuclear basket protein	0.0630358	7.26046	0.511672	0.99492
ENSG00000047457 (CP)	ENSG00000047457	CP	ceruloplasmin	-0.781593	3.33209	0.0710598	0.852047
ENSG00000047578 (KIAA0556)	ENSG00000047578	KIAA0556	KIAA0556	0.111976	5.81486	0.241168	0.953502
ENSG00000047579 (DTNBP1)	ENSG00000047579	DTNBP1	dystrobrevin binding protein 1	0.00786949	4.03473	0.956956	0.998939
ENSG00000047597 (XK)	ENSG00000047597	XK	X-linked Kx blood group	-0.139062	1.06815	0.602349	0.99492
ENSG00000047617 (ANO2)	ENSG00000047617	ANO2	anoctamin 2	-0.0726312	1.11915	0.822664	0.998725
ENSG00000047621 (C12orf4)	ENSG00000047621	C12orf4	chromosome 12 open reading frame 4	-0.0147255	3.92377	0.914517	0.998725
ENSG00000047634 (SCML1)	ENSG00000047634	SCML1	Scm polycomb group protein like 1	0.189485	3.70903	0.324075	0.978328
ENSG00000047644 (WWC3)	ENSG00000047644	WWC3	WWC family member 3	-0.031844	5.60944	0.742189	0.995009
ENSG00000047648 (ARHGAP6)	ENSG00000047648	ARHGAP6	Rho GTPase activating protein 6	0.113879	5.39566	0.44268	0.989281
ENSG00000047662 (FAM184B)	ENSG00000047662	FAM184B	family with sequence similarity 184 member B	0.202798	1.68712	0.525696	0.99492
ENSG00000047849 (MAP4)	ENSG00000047849	MAP4	microtubule associated protein 4	0.0267279	8.30195	0.800476	0.998396
ENSG00000047932 (GOPC)	ENSG00000047932	GOPC	golgi associated PDZ and coiled-coil motif containing	-0.0366271	4.97826	0.801356	0.998396
ENSG00000047936 (ROS1)	ENSG00000047936	ROS1	ROS proto-oncogene 1, receptor tyrosine kinase	0.390556	0.138428	0.453882	0.989281
ENSG00000048028 (USP28)	ENSG00000048028	USP28	ubiquitin specific peptidase 28	-0.0516847	4.4998	0.645492	0.99492
ENSG00000048052 (HDAC9)	ENSG00000048052	HDAC9	histone deacetylase 9	-0.407744	3.14565	0.2177	0.947189
ENSG00000048140 (TSPAN17)	ENSG00000048140	TSPAN17	tetraspanin 17	0.202772	4.92168	0.132607	0.903655
ENSG00000048162 (NOP16)	ENSG00000048162	NOP16	NOP16 nucleolar protein	0.327253	3.30299	0.0711719	0.852047
ENSG00000048342 (CC2D2A)	ENSG00000048342	CC2D2A	coiled-coil and C2 domain containing 2A	-0.347244	5.01749	0.0285655	0.723788
ENSG00000048392 (RRM2B)	ENSG00000048392	RRM2B	ribonucleotide reductase regulatory TP53 inducible subunit M2B	-0.0755999	4.87307	0.647416	0.99492
ENSG00000048405 (ZNF800)	ENSG00000048405	ZNF800	zinc finger protein 800	-0.0427315	4.85647	0.736191	0.994988
ENSG00000048471 (SNX29)	ENSG00000048471	SNX29	sorting nexin 29	0.0563106	7.88886	0.679019	0.99492
ENSG00000048540 (LMO3)	ENSG00000048540	LMO3	LIM domain only 3	0.12013	2.43344	0.754171	0.995009
ENSG00000048544 (MRPS10)	ENSG00000048544	MRPS10	mitochondrial ribosomal protein S10	0.10005	4.52179	0.459016	0.989281
ENSG00000048649 (RSF1)	ENSG00000048649	RSF1	remodeling and spacing factor 1	-0.0278584	6.49365	0.790911	0.998396
ENSG00000048707 (VPS13D)	ENSG00000048707	VPS13D	vacuolar protein sorting 13 homolog D	0.033265	8.32878	0.708278	0.99492
ENSG00000048740 (CELF2)	ENSG00000048740	CELF2	CUGBP Elav-like family member 2	0.200462	4.55663	0.485858	0.993598
ENSG00000048828 (FAM120A)	ENSG00000048828	FAM120A	family with sequence similarity 120A	-0.00924025	7.66713	0.908529	0.998725
ENSG00000048991 (R3HDM1)	ENSG00000048991	R3HDM1	R3H domain containing 1	0.0657878	4.99667	0.557461	0.99492
ENSG00000049089 (COL9A2)	ENSG00000049089	COL9A2	collagen type IX alpha 2 chain	0.056981	3.93632	0.823371	0.998725
ENSG00000049130 (KITLG)	ENSG00000049130	KITLG	KIT ligand	0.109276	6.12956	0.609599	0.99492
ENSG00000049167 (ERCC8)	ENSG00000049167	ERCC8	ERCC excision repair 8, CSA ubiquitin ligase complex subunit	0.143584	3.4351	0.357193	0.983713
ENSG00000049192 (ADAMTS6)	ENSG00000049192	ADAMTS6	ADAM metallopeptidase with thrombospondin type 1 motif 6	0.0689278	1.76427	0.860476	0.998725
ENSG00000049239 (H6PD)	ENSG00000049239	H6PD	hexose-6-phosphate dehydrogenase/glucose 1-dehydrogenase	0.0137029	7.008	0.914461	0.998725
ENSG00000049245 (VAMP3)	ENSG00000049245	VAMP3	vesicle associated membrane protein 3	0.00175999	5.67423	0.986563	0.998939
ENSG00000049246 (PER3)	ENSG00000049246	PER3	period circadian regulator 3	-0.244846	5.02925	0.572757	0.99492
ENSG00000049249 (TNFRSF9)	ENSG00000049249	TNFRSF9	TNF receptor superfamily member 9	0.0017839	0.202263	0.996307	0.998983
ENSG00000049283 (EPN3)	ENSG00000049283	EPN3	epsin 3	-0.238036	3.65801	0.432819	0.989281
ENSG00000049323 (LTBP1)	ENSG00000049323	LTBP1	latent transforming growth factor beta binding protein 1	-0.58345	5.31327	0.0301245	0.7296
ENSG00000049449 (RCN1)	ENSG00000049449	RCN1	reticulocalbin 1	0.129	5.60791	0.557053	0.99492
ENSG00000049540 (ELN)	ENSG00000049540	ELN	elastin	-0.0393396	4.9687	0.914236	0.998725
ENSG00000049541 (RFC2)	ENSG00000049541	RFC2	replication factor C subunit 2	0.245436	3.22047	0.109044	0.895367
ENSG00000049618 (ARID1B)	ENSG00000049618	ARID1B	AT-rich interaction domain 1B	0.0102764	7.84226	0.924873	0.998939
ENSG00000049656 (CLPTM1L)	ENSG00000049656	CLPTM1L	CLPTM1 like	0.310383	6.77235	0.0665626	0.850776
ENSG00000049759 (NEDD4L)	ENSG00000049759	NEDD4L	NEDD4 like E3 ubiquitin protein ligase	-0.212827	7.88931	0.137948	0.906621
ENSG00000049769 (PPP1R3F)	ENSG00000049769	PPP1R3F	protein phosphatase 1 regulatory subunit 3F	-0.167118	3.13159	0.393374	0.98756
ENSG00000049860 (HEXB)	ENSG00000049860	HEXB	hexosaminidase subunit beta	0.0947003	5.74769	0.497525	0.99492
ENSG00000049883 (PTCD2)	ENSG00000049883	PTCD2	pentatricopeptide repeat domain 2	-0.0813849	4.13609	0.575456	0.99492
ENSG00000050030 (NEXMIF)	ENSG00000050030	NEXMIF	neurite extension and migration factor	-0.212098	3.23108	0.415646	0.988956
ENSG00000050130 (JKAMP)	ENSG00000050130	JKAMP	JNK1/MAPK8 associated membrane protein	0.207003	4.57711	0.11195	0.89684
ENSG00000050165 (DKK3)	ENSG00000050165	DKK3	dickkopf WNT signaling pathway inhibitor 3	-0.299553	5.04052	0.181854	0.928014
ENSG00000050327 (ARHGEF5)	ENSG00000050327	ARHGEF5	Rho guanine nucleotide exchange factor 5	-0.0959365	5.0769	0.770291	0.996679
ENSG00000050344 (NFE2L3)	ENSG00000050344	NFE2L3	nuclear factor, erythroid 2 like 3	0.175218	2.01019	0.506955	0.99492
ENSG00000050393 (MCUR1)	ENSG00000050393	MCUR1	mitochondrial calcium uniporter regulator 1	-0.145358	5.55684	0.378731	0.98683
ENSG00000050405 (LIMA1)	ENSG00000050405	LIMA1	LIM domain and actin binding 1	0.0323439	6.22788	0.797153	0.998396
ENSG00000050426 (LETMD1)	ENSG00000050426	LETMD1	LETM1 domain containing 1	-0.0597748	5.52531	0.62977	0.99492
ENSG00000050438 (SLC4A8)	ENSG00000050438	SLC4A8	solute carrier family 4 member 8	-0.335288	2.83256	0.381277	0.98715
ENSG00000050555 (LAMC3)	ENSG00000050555	LAMC3	laminin subunit gamma 3	-0.0446131	5.7295	0.83266	0.998725
ENSG00000050628 (PTGER3)	ENSG00000050628	PTGER3	prostaglandin E receptor 3	-0.307772	7.34277	0.272681	0.966893
ENSG00000050748 (MAPK9)	ENSG00000050748	MAPK9	mitogen-activated protein kinase 9	0.0170722	4.96496	0.886049	0.998725
ENSG00000050767 (COL23A1)	ENSG00000050767	COL23A1	collagen type XXIII alpha 1 chain	-0.0626769	2.68824	0.768784	0.996392
ENSG00000050820 (BCAR1)	ENSG00000050820	BCAR1	BCAR1 scaffold protein, Cas family member	-0.0981523	6.38621	0.604594	0.99492
ENSG00000051009 (FAM160A2)	ENSG00000051009	FAM160A2	family with sequence similarity 160 member A2	-0.00739105	5.48784	0.948365	0.998939
ENSG00000051108 (HERPUD1)	ENSG00000051108	HERPUD1	homocysteine inducible ER protein with ubiquitin like domain 1	0.00452172	6.91194	0.971274	0.998939
ENSG00000051128 (HOMER3)	ENSG00000051128	HOMER3	homer scaffold protein 3	0.347425	4.73337	0.176858	0.926446
ENSG00000051180 (RAD51)	ENSG00000051180	RAD51	RAD51 recombinase	0.316051	-0.628852	0.393997	0.98756
ENSG00000051341 (POLQ)	ENSG00000051341	POLQ	DNA polymerase theta	0.0997073	0.976012	0.799129	0.998396
ENSG00000051382 (PIK3CB)	ENSG00000051382	PIK3CB	phosphatidylinositol-4,5-bisphosphate 3-kinase catalytic subunit beta	-0.136262	5.90114	0.296297	0.971453
ENSG00000051523 (CYBA)	ENSG00000051523	CYBA	cytochrome b-245 alpha chain	0.156979	5.82694	0.322796	0.977456
ENSG00000051596 (THOC3)	ENSG00000051596	THOC3	THO complex 3	0.184077	3.41837	0.336015	0.980398
ENSG00000051620 (HEBP2)	ENSG00000051620	HEBP2	heme binding protein 2	-0.0127812	5.38074	0.917561	0.998939
ENSG00000051825 (MPHOSPH9)	ENSG00000051825	MPHOSPH9	M-phase phosphoprotein 9	0.0120496	5.02362	0.932326	0.998939
ENSG00000052126 (PLEKHA5)	ENSG00000052126	PLEKHA5	pleckstrin homology domain containing A5	-0.0424558	6.93795	0.814483	0.998396
ENSG00000052344 (PRSS8)	ENSG00000052344	PRSS8	serine protease 8	-0.238299	5.81302	0.1263	0.90314
ENSG00000052723 (SIKE1)	ENSG00000052723	SIKE1	suppressor of IKBKE 1	0.0369598	5.03346	0.796623	0.998396
ENSG00000052749 (RRP12)	ENSG00000052749	RRP12	ribosomal RNA processing 12 homolog	0.291138	4.63063	0.0699022	0.852047
ENSG00000052795 (FNIP2)	ENSG00000052795	FNIP2	folliculin interacting protein 2	0.394685	7.50572	0.201191	0.939677
ENSG00000052802 (MSMO1)	ENSG00000052802	MSMO1	methylsterol monooxygenase 1	-0.31743	4.88787	0.182902	0.928847
ENSG00000052841 (TTC17)	ENSG00000052841	TTC17	tetratricopeptide repeat domain 17	0.0332211	6.49761	0.733326	0.994974
ENSG00000053108 (FSTL4)	ENSG00000053108	FSTL4	follistatin like 4	0.0893903	2.65206	0.80275	0.998396
ENSG00000053254 (FOXN3)	ENSG00000053254	FOXN3	forkhead box N3	-0.146527	6.28482	0.24265	0.953502
ENSG00000053328 (METTL24)	ENSG00000053328	METTL24	methyltransferase like 24	-0.104242	1.80227	0.627855	0.99492
ENSG00000053371 (AKR7A2)	ENSG00000053371	AKR7A2	aldo-keto reductase family 7 member A2	0.00484348	5.41194	0.968512	0.998939
ENSG00000053372 (MRTO4)	ENSG00000053372	MRTO4	MRT4 homolog, ribosome maturation factor	0.348548	3.79254	0.0779802	0.858743
ENSG00000053501 (USE1)	ENSG00000053501	USE1	unconventional SNARE in the ER 1	0.129366	3.36455	0.31407	0.97436
ENSG00000053524 (MCF2L2)	ENSG00000053524	MCF2L2	MCF.2 cell line derived transforming sequence-like 2	0.23523	1.86971	0.305204	0.97261
ENSG00000053702 (NRIP2)	ENSG00000053702	NRIP2	nuclear receptor interacting protein 2	-0.482949	3.45722	0.10677	0.89332
ENSG00000053747 (LAMA3)	ENSG00000053747	LAMA3	laminin subunit alpha 3	-0.127198	3.8284	0.618986	0.99492
ENSG00000053770 (AP5M1)	ENSG00000053770	AP5M1	adaptor related protein complex 5 subunit mu 1	0.0638322	6.0814	0.717814	0.99492
ENSG00000053900 (ANAPC4)	ENSG00000053900	ANAPC4	anaphase promoting complex subunit 4	0.0365235	4.61	0.803769	0.998396
ENSG00000053918 (KCNQ1)	ENSG00000053918	KCNQ1	potassium voltage-gated channel subfamily Q member 1	-0.243526	5.41602	0.137643	0.906621
ENSG00000054116 (TRAPPC3)	ENSG00000054116	TRAPPC3	trafficking protein particle complex 3	0.117368	4.8976	0.228454	0.949561
ENSG00000054118 (THRAP3)	ENSG00000054118	THRAP3	thyroid hormone receptor associated protein 3	-0.0264825	7.16727	0.784717	0.998396
ENSG00000054148 (PHPT1)	ENSG00000054148	PHPT1	phosphohistidine phosphatase 1	-0.20442	4.92796	0.0949748	0.875335
ENSG00000054179 (ENTPD2)	ENSG00000054179	ENTPD2	ectonucleoside triphosphate diphosphohydrolase 2	-0.0403944	3.09409	0.828167	0.998725
ENSG00000054219 (LY75)	ENSG00000054219	LY75	lymphocyte antigen 75	0.210586	4.005	0.477734	0.989506
ENSG00000054267 (ARID4B)	ENSG00000054267	ARID4B	AT-rich interaction domain 4B	0.0113366	6.00777	0.90832	0.998725
ENSG00000054277 (OPN3)	ENSG00000054277	OPN3	opsin 3	-0.155823	3.51061	0.414291	0.988956
ENSG00000054282 (SDCCAG8)	ENSG00000054282	SDCCAG8	serologically defined colon cancer antigen 8	-0.44655	4.16214	0.0538799	0.823905
ENSG00000054392 (HHAT)	ENSG00000054392	HHAT	hedgehog acyltransferase	-0.3922	3.21756	0.0914249	0.873014
ENSG00000054523 (KIF1B)	ENSG00000054523	KIF1B	kinesin family member 1B	0.0678177	7.62411	0.524487	0.99492
ENSG00000054598 (FOXC1)	ENSG00000054598	FOXC1	forkhead box C1	-0.190626	5.11146	0.354329	0.983713
ENSG00000054611 (TBC1D22A)	ENSG00000054611	TBC1D22A	TBC1 domain family member 22A	0.00140105	5.30126	0.990626	0.998939
ENSG00000054654 (SYNE2)	ENSG00000054654	SYNE2	spectrin repeat containing nuclear envelope protein 2	0.0676888	10.6785	0.673469	0.99492
ENSG00000054690 (PLEKHH1)	ENSG00000054690	PLEKHH1	pleckstrin homology, MyTH4 and FERM domain containing H1	-0.00188154	5.67857	0.989495	0.998939
ENSG00000054793 (ATP9A)	ENSG00000054793	ATP9A	ATPase phospholipid transporting 9A (putative)	-0.183126	6.25749	0.114356	0.89684
ENSG00000054803 (CBLN4)	ENSG00000054803	CBLN4	cerebellin 4 precursor	-0.552429	-0.0524559	0.447989	0.989281
ENSG00000054965 (FAM168A)	ENSG00000054965	FAM168A	family with sequence similarity 168 member A	0.0224779	6.25871	0.806028	0.998396
ENSG00000054967 (RELT)	ENSG00000054967	RELT	RELT TNF receptor	0.378243	2.65243	0.236678	0.953245
ENSG00000054983 (GALC)	ENSG00000054983	GALC	galactosylceramidase	-0.0082324	4.88017	0.951624	0.998939
ENSG00000055044 (NOP58)	ENSG00000055044	NOP58	NOP58 ribonucleoprotein	0.122159	4.73757	0.355339	0.983713
ENSG00000055070 (SZRD1)	ENSG00000055070	SZRD1	SUZ RNA binding domain containing 1	0.13052	6.61684	0.202577	0.939731
ENSG00000055118 (KCNH2)	ENSG00000055118	KCNH2	potassium voltage-gated channel subfamily H member 2	0.0843533	0.821673	0.834285	0.998725
ENSG00000055130 (CUL1)	ENSG00000055130	CUL1	cullin 1	-0.00200443	5.40271	0.985033	0.998939
ENSG00000055147 (FAM114A2)	ENSG00000055147	FAM114A2	family with sequence similarity 114 member A2	-0.0300883	4.34955	0.810034	0.998396
ENSG00000055163 (CYFIP2)	ENSG00000055163	CYFIP2	cytoplasmic FMR1 interacting protein 2	-0.437214	8.35902	0.107798	0.893897
ENSG00000055208 (TAB2)	ENSG00000055208	TAB2	TGF-beta activated kinase 1 (MAP3K7) binding protein 2	-0.0338777	6.33941	0.720651	0.99492
ENSG00000055211 (GINM1)	ENSG00000055211	GINM1	glycoprotein integral membrane 1	0.0240993	5.8397	0.84808	0.998725
ENSG00000055332 (EIF2AK2)	ENSG00000055332	EIF2AK2	eukaryotic translation initiation factor 2 alpha kinase 2	0.11993	6.56688	0.405359	0.988399
ENSG00000055483 (USP36)	ENSG00000055483	USP36	ubiquitin specific peptidase 36	0.156803	5.82183	0.272238	0.966375
ENSG00000055609 (KMT2C)	ENSG00000055609	KMT2C	lysine methyltransferase 2C	-0.00400904	8.2835	0.971553	0.998939
ENSG00000055732 (MCOLN3)	ENSG00000055732	MCOLN3	mucolipin 3	0.39577	3.60813	0.0381796	0.781005
ENSG00000055813 (CCDC85A)	ENSG00000055813	CCDC85A	coiled-coil domain containing 85A	-0.240869	1.45461	0.302237	0.972309
ENSG00000055917 (PUM2)	ENSG00000055917	PUM2	pumilio RNA binding family member 2	-0.0585962	6.80431	0.641099	0.99492
ENSG00000055950 (MRPL43)	ENSG00000055950	MRPL43	mitochondrial ribosomal protein L43	-0.0980961	4.56624	0.388848	0.98756
ENSG00000055955 (ITIH4)	ENSG00000055955	ITIH4	inter-alpha-trypsin inhibitor heavy chain 4	-0.586662	2.80552	0.00815262	0.491941
ENSG00000056050 (HPF1)	ENSG00000056050	HPF1	histone PARylation factor 1	0.13937	2.3689	0.425121	0.989281
ENSG00000056097 (ZFR)	ENSG00000056097	ZFR	zinc finger RNA binding protein	0.0826759	6.38274	0.510551	0.99492
ENSG00000056277 (ZNF280C)	ENSG00000056277	ZNF280C	zinc finger protein 280C	0.177025	2.73489	0.242324	0.953502
ENSG00000056487 (PHF21B)	ENSG00000056487	PHF21B	PHD finger protein 21B	0.0187638	2.12665	0.930333	0.998939
ENSG00000056558 (TRAF1)	ENSG00000056558	TRAF1	TNF receptor associated factor 1	0.145014	3.8947	0.587309	0.99492
ENSG00000056586 (RC3H2)	ENSG00000056586	RC3H2	ring finger and CCCH-type domains 2	-0.0164797	6.32269	0.867994	0.998725
ENSG00000056736 (IL17RB)	ENSG00000056736	IL17RB	interleukin 17 receptor B	-0.382759	6.94258	0.0809883	0.864523
ENSG00000056972 (TRAF3IP2)	ENSG00000056972	TRAF3IP2	TRAF3 interacting protein 2	0.209328	4.20488	0.161391	0.926446
ENSG00000056998 (GYG2)	ENSG00000056998	GYG2	glycogenin 2	-0.364778	1.69867	0.122186	0.90314
ENSG00000057019 (DCBLD2)	ENSG00000057019	DCBLD2	discoidin, CUB and LCCL domain containing 2	0.13158	5.64093	0.413989	0.988956
ENSG00000057252 (SOAT1)	ENSG00000057252	SOAT1	sterol O-acyltransferase 1	0.00344013	5.60024	0.977143	0.998939
ENSG00000057294 (PKP2)	ENSG00000057294	PKP2	plakophilin 2	-0.194407	4.02582	0.234642	0.953245
ENSG00000057468 (MSH4)	ENSG00000057468	MSH4	mutS homolog 4	-0.242237	-0.65601	0.600152	0.99492
ENSG00000057593 (F7)	ENSG00000057593	F7	coagulation factor VII	-0.067293	-0.319709	0.885033	0.998725
ENSG00000057608 (GDI2)	ENSG00000057608	GDI2	GDP dissociation inhibitor 2	0.0605958	6.96385	0.585452	0.99492
ENSG00000057657 (PRDM1)	ENSG00000057657	PRDM1	PR/SET domain 1	-0.00197808	3.16379	0.994842	0.998939
ENSG00000057663 (ATG5)	ENSG00000057663	ATG5	autophagy related 5	0.054228	4.3167	0.708236	0.99492
ENSG00000057704 (TMCC3)	ENSG00000057704	TMCC3	transmembrane and coiled-coil domain family 3	-0.0193076	5.07544	0.910106	0.998725
ENSG00000057757 (PITHD1)	ENSG00000057757	PITHD1	PITH domain containing 1	0.117119	4.37915	0.216793	0.94577
ENSG00000057935 (MTA3)	ENSG00000057935	MTA3	metastasis associated 1 family member 3	0.102626	4.99375	0.35323	0.983688
ENSG00000058056 (USP13)	ENSG00000058056	USP13	ubiquitin specific peptidase 13	-0.0270432	4.44595	0.884627	0.998725
ENSG00000058063 (ATP11B)	ENSG00000058063	ATP11B	ATPase phospholipid transporting 11B (putative)	0.0252144	6.15656	0.829958	0.998725
ENSG00000058085 (LAMC2)	ENSG00000058085	LAMC2	laminin subunit gamma 2	0.0397629	4.35797	0.926473	0.998939
ENSG00000058091 (CDK14)	ENSG00000058091	CDK14	cyclin dependent kinase 14	-0.0996813	5.82458	0.452294	0.989281
ENSG00000058262 (SEC61A1)	ENSG00000058262	SEC61A1	SEC61 translocon alpha 1 subunit	0.15424	7.47238	0.182529	0.928223
ENSG00000058272 (PPP1R12A)	ENSG00000058272	PPP1R12A	protein phosphatase 1 regulatory subunit 12A	0.0032653	6.29808	0.976121	0.998939
ENSG00000058335 (RASGRF1)	ENSG00000058335	RASGRF1	Ras protein specific guanine nucleotide releasing factor 1	-0.195177	2.61203	0.640368	0.99492
ENSG00000058404 (CAMK2B)	ENSG00000058404	CAMK2B	calcium/calmodulin dependent protein kinase II beta	-0.401772	1.95677	0.0713877	0.852047
ENSG00000058453 (CROCC)	ENSG00000058453	CROCC	ciliary rootlet coiled-coil, rootletin	-0.283634	5.27481	0.0483089	0.810879
ENSG00000058600 (POLR3E)	ENSG00000058600	POLR3E	RNA polymerase III subunit E	0.100677	5.3732	0.373049	0.984803
ENSG00000058668 (ATP2B4)	ENSG00000058668	ATP2B4	ATPase plasma membrane Ca2+ transporting 4	0.0391876	6.96406	0.751554	0.995009
ENSG00000058673 (ZC3H11A)	ENSG00000058673	ZC3H11A	zinc finger CCCH-type containing 11A	-0.130786	6.04059	0.368454	0.984616
ENSG00000058729 (RIOK2)	ENSG00000058729	RIOK2	RIO kinase 2	0.142084	3.55546	0.391098	0.98756
ENSG00000058799 (YIPF1)	ENSG00000058799	YIPF1	Yip1 domain family member 1	0.234286	4.18779	0.056136	0.831862
ENSG00000058804 (NDC1)	ENSG00000058804	NDC1	NDC1 transmembrane nucleoporin	0.271385	3.7652	0.108064	0.894302
ENSG00000058866 (DGKG)	ENSG00000058866	DGKG	diacylglycerol kinase gamma	0.355849	4.58022	0.311781	0.97436
ENSG00000059122 (FLYWCH1)	ENSG00000059122	FLYWCH1	FLYWCH-type zinc finger 1	0.0752162	5.60607	0.653017	0.99492
ENSG00000059145 (UNKL)	ENSG00000059145	UNKL	unk like zinc finger	-0.011279	4.55245	0.952217	0.998939
ENSG00000059377 (TBXAS1)	ENSG00000059377	TBXAS1	thromboxane A synthase 1	0.0490866	3.75522	0.820192	0.998725
ENSG00000059378 (PARP12)	ENSG00000059378	PARP12	poly(ADP-ribose) polymerase family member 12	7.64e-05	4.37861	0.999744	1
ENSG00000059573 (ALDH18A1)	ENSG00000059573	ALDH18A1	aldehyde dehydrogenase 18 family member A1	0.244381	5.42356	0.0717322	0.852047
ENSG00000059588 (TARBP1)	ENSG00000059588	TARBP1	TAR (HIV-1) RNA binding protein 1	0.0288847	4.93282	0.806506	0.998396
ENSG00000059691 (GATB)	ENSG00000059691	GATB	glutamyl-tRNA amidotransferase subunit B	-0.177494	4.54586	0.180839	0.927005
ENSG00000059728 (MXD1)	ENSG00000059728	MXD1	MAX dimerization protein 1	0.0830007	4.14364	0.601816	0.99492
ENSG00000059758 (CDK17)	ENSG00000059758	CDK17	cyclin dependent kinase 17	0.134885	4.81931	0.316961	0.97653
ENSG00000059769 (DNAJC25)	ENSG00000059769	DNAJC25	DnaJ heat shock protein family (Hsp40) member C25	0.308837	3.31923	0.0426964	0.799843
ENSG00000059804 (SLC2A3)	ENSG00000059804	SLC2A3	solute carrier family 2 member 3	-0.534496	5.27757	0.3566	0.983713
ENSG00000059915 (PSD)	ENSG00000059915	PSD	pleckstrin and Sec7 domain containing	-0.282586	1.08464	0.355705	0.983713
ENSG00000060069 (CTDP1)	ENSG00000060069	CTDP1	CTD phosphatase subunit 1	-0.0183056	4.84905	0.908444	0.998725
ENSG00000060138 (YBX3)	ENSG00000060138	YBX3	Y-box binding protein 3	0.296893	6.90289	0.0922358	0.874076
ENSG00000060140 (STYK1)	ENSG00000060140	STYK1	serine/threonine/tyrosine kinase 1	-0.0229553	-1.29384	0.961608	0.998939
ENSG00000060237 (WNK1)	ENSG00000060237	WNK1	WNK lysine deficient protein kinase 1	0.0494126	9.39011	0.794421	0.998396
ENSG00000060339 (CCAR1)	ENSG00000060339	CCAR1	cell division cycle and apoptosis regulator 1	0.0858788	6.13824	0.382658	0.98715
ENSG00000060491 (OGFR)	ENSG00000060491	OGFR	opioid growth factor receptor	-0.00731178	5.63388	0.961383	0.998939
ENSG00000060558 (GNA15)	ENSG00000060558	GNA15	G protein subunit alpha 15	0.187984	1.477	0.62375	0.99492
ENSG00000060566 (CREB3L3)	ENSG00000060566	CREB3L3	cAMP responsive element binding protein 3 like 3	1.09137	0.966215	0.286343	0.971453
ENSG00000060642 (PIGV)	ENSG00000060642	PIGV	phosphatidylinositol glycan anchor biosynthesis class V	-0.114668	3.85537	0.43501	0.989281
ENSG00000060656 (PTPRU)	ENSG00000060656	PTPRU	protein tyrosine phosphatase receptor type U	-0.0872919	3.87089	0.707779	0.99492
ENSG00000060688 (SNRNP40)	ENSG00000060688	SNRNP40	small nuclear ribonucleoprotein U5 subunit 40	0.0607807	4.20861	0.614675	0.99492
ENSG00000060709 (RIMBP2)	ENSG00000060709	RIMBP2	RIMS binding protein 2	-0.786083	3.72214	0.00276912	0.320762
ENSG00000060718 (COL11A1)	ENSG00000060718	COL11A1	collagen type XI alpha 1 chain	0.666067	-0.251774	0.110519	0.89684
ENSG00000060749 (QSER1)	ENSG00000060749	QSER1	glutamine and serine rich 1	-0.0550164	5.89951	0.683538	0.99492
ENSG00000060762 (MPC1)	ENSG00000060762	MPC1	mitochondrial pyruvate carrier 1	-0.35755	5.27978	0.105047	0.892502
ENSG00000060971 (ACAA1)	ENSG00000060971	ACAA1	acetyl-CoA acyltransferase 1	-0.348815	7.45302	0.265171	0.959828
ENSG00000060982 (BCAT1)	ENSG00000060982	BCAT1	branched chain amino acid transaminase 1	0.16506	3.44792	0.594118	0.99492
ENSG00000061273 (HDAC7)	ENSG00000061273	HDAC7	histone deacetylase 7	0.135044	6.51766	0.466314	0.989281
ENSG00000061337 (LZTS1)	ENSG00000061337	LZTS1	leucine zipper tumor suppressor 1	0.0655068	3.70191	0.761927	0.995009
ENSG00000061455 (PRDM6)	ENSG00000061455	PRDM6	PR/SET domain 6	-0.212301	1.58401	0.527343	0.99492
ENSG00000061656 (SPAG4)	ENSG00000061656	SPAG4	sperm associated antigen 4	0.456136	1.58015	0.134738	0.905272
ENSG00000061676 (NCKAP1)	ENSG00000061676	NCKAP1	NCK associated protein 1	0.0453962	7.49293	0.709369	0.99492
ENSG00000061794 (MRPS35)	ENSG00000061794	MRPS35	mitochondrial ribosomal protein S35	-0.0757685	5.12913	0.563604	0.99492
ENSG00000061918 (GUCY1B1)	ENSG00000061918	GUCY1B1	guanylate cyclase 1 soluble subunit beta 1	-0.267126	4.42337	0.14556	0.914707
ENSG00000061936 (SFSWAP)	ENSG00000061936	SFSWAP	splicing factor SWAP	0.150177	5.96906	0.154715	0.921589
ENSG00000061938 (TNK2)	ENSG00000061938	TNK2	tyrosine kinase non receptor 2	-0.177331	5.15601	0.431583	0.989281
ENSG00000061987 (MON2)	ENSG00000061987	MON2	MON2 homolog, regulator of endosome-to-Golgi trafficking	0.109793	6.69997	0.431482	0.989281
ENSG00000062038 (CDH3)	ENSG00000062038	CDH3	cadherin 3	-0.294626	4.07806	0.150334	0.918831
ENSG00000062096 (ARSF)	ENSG00000062096	ARSF	arylsulfatase F	-0.813678	1.57506	0.0930712	0.874267
ENSG00000062194 (GPBP1)	ENSG00000062194	GPBP1	GC-rich promoter binding protein 1	-0.0543742	6.10387	0.685928	0.99492
ENSG00000062282 (DGAT2)	ENSG00000062282	DGAT2	diacylglycerol O-acyltransferase 2	-0.0698576	1.79829	0.784112	0.998256
ENSG00000062370 (ZNF112)	ENSG00000062370	ZNF112	zinc finger protein 112	-0.0363437	3.16063	0.817375	0.998725
ENSG00000062485 (CS)	ENSG00000062485	CS	citrate synthase	-0.0640047	7.24754	0.537057	0.99492
ENSG00000062524 (LTK)	ENSG00000062524	LTK	leukocyte receptor tyrosine kinase	0.493127	1.85416	0.110982	0.89684
ENSG00000062582 (MRPS24)	ENSG00000062582	MRPS24	mitochondrial ribosomal protein S24	-0.178647	4.43832	0.162776	0.926446
ENSG00000062598 (ELMO2)	ENSG00000062598	ELMO2	engulfment and cell motility 2	-0.00989675	5.27503	0.909231	0.998725
ENSG00000062650 (WAPL)	ENSG00000062650	WAPL	WAPL cohesin release factor	0.0519465	6.37048	0.578658	0.99492
ENSG00000062716 (VMP1)	ENSG00000062716	VMP1	vacuole membrane protein 1	0.700948	7.8961	0.00476929	0.408202
ENSG00000062725 (APPBP2)	ENSG00000062725	APPBP2	amyloid beta precursor protein binding protein 2	-0.0659057	5.84449	0.662109	0.99492
ENSG00000062822 (POLD1)	ENSG00000062822	POLD1	DNA polymerase delta 1, catalytic subunit	0.177843	3.61833	0.375032	0.985667
ENSG00000063046 (EIF4B)	ENSG00000063046	EIF4B	eukaryotic translation initiation factor 4B	-0.195642	8.64379	0.15313	0.921299
ENSG00000063127 (SLC6A16)	ENSG00000063127	SLC6A16	solute carrier family 6 member 16	-0.341129	2.97874	0.165905	0.926446
ENSG00000063169 (BICRA)	ENSG00000063169	BICRA	BRD4 interacting chromatin remodeling complex associated protein	-0.0272619	4.56143	0.846511	0.998725
ENSG00000063176 (SPHK2)	ENSG00000063176	SPHK2	sphingosine kinase 2	-0.118676	5.59789	0.459783	0.989281
ENSG00000063177 (RPL18)	ENSG00000063177	RPL18	ribosomal protein L18	0.0227045	7.07267	0.838523	0.998725
ENSG00000063180 (CA11)	ENSG00000063180	CA11	carbonic anhydrase 11	0.251993	2.78255	0.214469	0.945496
ENSG00000063241 (ISOC2)	ENSG00000063241	ISOC2	isochorismatase domain containing 2	-0.21493	5.25154	0.304608	0.972383
ENSG00000063244 (U2AF2)	ENSG00000063244	U2AF2	U2 small nuclear RNA auxiliary factor 2	-0.0144364	6.56409	0.895703	0.998725
ENSG00000063245 (EPN1)	ENSG00000063245	EPN1	epsin 1	0.00200816	7.1561	0.984057	0.998939
ENSG00000063322 (MED29)	ENSG00000063322	MED29	mediator complex subunit 29	-0.059168	5.58642	0.523439	0.99492
ENSG00000063438 (AHRR)	ENSG00000063438	AHRR	aryl-hydrocarbon receptor repressor	0.78372	-0.68205	0.215179	0.945496
ENSG00000063587 (ZNF275)	ENSG00000063587	ZNF275	zinc finger protein 275	-0.0836436	4.86424	0.514726	0.99492
ENSG00000063601 (MTMR1)	ENSG00000063601	MTMR1	myotubularin related protein 1	0.0842901	4.65034	0.379939	0.98683
ENSG00000063660 (GPC1)	ENSG00000063660	GPC1	glypican 1	0.253219	5.57203	0.225549	0.948529
ENSG00000063761 (ADCK1)	ENSG00000063761	ADCK1	aarF domain containing kinase 1	0.151538	3.44036	0.298158	0.971768
ENSG00000063854 (HAGH)	ENSG00000063854	HAGH	hydroxyacylglutathione hydrolase	-0.247297	6.05923	0.152534	0.920776
ENSG00000063978 (RNF4)	ENSG00000063978	RNF4	ring finger protein 4	0.24924	5.80622	0.0203898	0.653314
ENSG00000064012 (CASP8)	ENSG00000064012	CASP8	caspase 8	0.191234	4.57901	0.175481	0.926446
ENSG00000064042 (LIMCH1)	ENSG00000064042	LIMCH1	LIM and calponin homology domains 1	0.0600015	6.76819	0.611771	0.99492
ENSG00000064102 (INTS13)	ENSG00000064102	INTS13	integrator complex subunit 13	0.203074	3.86631	0.0921138	0.874076
ENSG00000064115 (TM7SF3)	ENSG00000064115	TM7SF3	transmembrane 7 superfamily member 3	0.138606	6.54339	0.333341	0.980398
ENSG00000064195 (DLX3)	ENSG00000064195	DLX3	distal-less homeobox 3	-0.166876	-1.71257	0.724206	0.99492
ENSG00000064199 (SPA17)	ENSG00000064199	SPA17	sperm autoantigenic protein 17	-0.169279	2.57511	0.296282	0.971453
ENSG00000064201 (TSPAN32)	ENSG00000064201	TSPAN32	tetraspanin 32	0.516032	-0.0324579	0.37129	0.984803
ENSG00000064225 (ST3GAL6)	ENSG00000064225	ST3GAL6	ST3 beta-galactoside alpha-2,3-sialyltransferase 6	-0.0811274	4.25897	0.643516	0.99492
ENSG00000064270 (ATP2C2)	ENSG00000064270	ATP2C2	ATPase secretory pathway Ca2+ transporting 2	-0.0782496	2.75196	0.846203	0.998725
ENSG00000064300 (NGFR)	ENSG00000064300	NGFR	nerve growth factor receptor	0.0839595	3.50942	0.802101	0.998396
ENSG00000064309 (CDON)	ENSG00000064309	CDON	cell adhesion associated, oncogene regulated	0.165631	3.26838	0.556912	0.99492
ENSG00000064313 (TAF2)	ENSG00000064313	TAF2	TATA-box binding protein associated factor 2	0.129679	5.15717	0.202823	0.939731
ENSG00000064393 (HIPK2)	ENSG00000064393	HIPK2	homeodomain interacting protein kinase 2	0.0236727	9.813	0.882055	0.998725
ENSG00000064419 (TNPO3)	ENSG00000064419	TNPO3	transportin 3	0.142516	6.08254	0.115343	0.89684
ENSG00000064489 (BORCS8-MEF2B)	ENSG00000064489	BORCS8-MEF2B	BORCS8-MEF2B readthrough	0.49654	0.79425	0.318633	0.976671
ENSG00000064490 (RFXANK)	ENSG00000064490	RFXANK	regulatory factor X associated ankyrin containing protein	0.115871	3.78139	0.3043	0.972383
ENSG00000064545 (TMEM161A)	ENSG00000064545	TMEM161A	transmembrane protein 161A	0.0265597	3.76471	0.816826	0.998725
ENSG00000064547 (LPAR2)	ENSG00000064547	LPAR2	lysophosphatidic acid receptor 2	0.0293825	1.57202	0.926169	0.998939
ENSG00000064601 (CTSA)	ENSG00000064601	CTSA	cathepsin A	0.151354	8.01085	0.415142	0.988956
ENSG00000064607 (SUGP2)	ENSG00000064607	SUGP2	SURP and G-patch domain containing 2	0.0756525	6.95786	0.423898	0.989281
ENSG00000064651 (SLC12A2)	ENSG00000064651	SLC12A2	solute carrier family 12 member 2	0.174201	5.37816	0.320469	0.976878
ENSG00000064652 (SNX24)	ENSG00000064652	SNX24	sorting nexin 24	-0.0337986	3.98388	0.794042	0.998396
ENSG00000064655 (EYA2)	ENSG00000064655	EYA2	EYA transcriptional coactivator and phosphatase 2	0.00490691	3.4522	0.982074	0.998939
ENSG00000064666 (CNN2)	ENSG00000064666	CNN2	calponin 2	-0.0756634	6.03365	0.542867	0.99492
ENSG00000064687 (ABCA7)	ENSG00000064687	ABCA7	ATP binding cassette subfamily A member 7	0.127222	4.40622	0.471549	0.989281
ENSG00000064692 (SNCAIP)	ENSG00000064692	SNCAIP	synuclein alpha interacting protein	-0.0694214	1.05224	0.88125	0.998725
ENSG00000064703 (DDX20)	ENSG00000064703	DDX20	DEAD-box helicase 20	0.167411	3.5739	0.21337	0.945496
ENSG00000064726 (BTBD1)	ENSG00000064726	BTBD1	BTB domain containing 1	0.0170496	5.36829	0.880048	0.998725
ENSG00000064763 (FAR2)	ENSG00000064763	FAR2	fatty acyl-CoA reductase 2	0.386248	2.30569	0.138721	0.906621
ENSG00000064787 (BCAS1)	ENSG00000064787	BCAS1	breast carcinoma amplified sequence 1	-0.651942	0.030758	0.0559565	0.831771
ENSG00000064886 (CHI3L2)	ENSG00000064886	CHI3L2	chitinase 3 like 2	0.482878	0.291438	0.199717	0.937795
ENSG00000064932 (SBNO2)	ENSG00000064932	SBNO2	strawberry notch homolog 2	0.19043	6.14373	0.367557	0.984616
ENSG00000064933 (PMS1)	ENSG00000064933	PMS1	PMS1 homolog 1, mismatch repair system component	-0.0647074	3.58028	0.725487	0.99492
ENSG00000064961 (HMG20B)	ENSG00000064961	HMG20B	high mobility group 20B	0.0126821	5.6061	0.912532	0.998725
ENSG00000064989 (CALCRL)	ENSG00000064989	CALCRL	calcitonin receptor like receptor	0.271704	4.54476	0.14296	0.912139
ENSG00000064995 (TAF11)	ENSG00000064995	TAF11	TATA-box binding protein associated factor 11	0.144826	3.57634	0.242098	0.953502
ENSG00000064999 (ANKS1A)	ENSG00000064999	ANKS1A	ankyrin repeat and sterile alpha motif domain containing 1A	0.0814158	6.24321	0.420156	0.989281
ENSG00000065000 (AP3D1)	ENSG00000065000	AP3D1	adaptor related protein complex 3 subunit delta 1	-0.0405923	7.74761	0.693591	0.99492
ENSG00000065029 (ZNF76)	ENSG00000065029	ZNF76	zinc finger protein 76	0.0564165	5.32214	0.568667	0.99492
ENSG00000065054 (SLC9A3R2)	ENSG00000065054	SLC9A3R2	SLC9A3 regulator 2	0.0459293	6.34084	0.78203	0.997994
ENSG00000065057 (NTHL1)	ENSG00000065057	NTHL1	nth like DNA glycosylase 1	-0.117052	2.03734	0.649152	0.99492
ENSG00000065060 (UHRF1BP1)	ENSG00000065060	UHRF1BP1	UHRF1 binding protein 1	0.0284484	5.55094	0.796281	0.998396
ENSG00000065135 (GNAI3)	ENSG00000065135	GNAI3	G protein subunit alpha i3	0.0169878	5.71436	0.894728	0.998725
ENSG00000065150 (IPO5)	ENSG00000065150	IPO5	importin 5	0.0145058	6.69519	0.892645	0.998725
ENSG00000065154 (OAT)	ENSG00000065154	OAT	ornithine aminotransferase	-0.178667	5.47632	0.263474	0.959503
ENSG00000065183 (WDR3)	ENSG00000065183	WDR3	WD repeat domain 3	0.0970945	4.46736	0.415747	0.988956
ENSG00000065243 (PKN2)	ENSG00000065243	PKN2	protein kinase N2	0.0208324	5.9785	0.866108	0.998725
ENSG00000065268 (WDR18)	ENSG00000065268	WDR18	WD repeat domain 18	0.0307203	4.17893	0.879328	0.998725
ENSG00000065308 (TRAM2)	ENSG00000065308	TRAM2	translocation associated membrane protein 2	0.124549	5.5609	0.502772	0.99492
ENSG00000065320 (NTN1)	ENSG00000065320	NTN1	netrin 1	-0.374125	3.14094	0.281504	0.969332
ENSG00000065325 (GLP2R)	ENSG00000065325	GLP2R	glucagon like peptide 2 receptor	1.68287	-3.27887	0.127597	0.90314
ENSG00000065328 (MCM10)	ENSG00000065328	MCM10	minichromosome maintenance 10 replication initiation factor	0.39398	-0.397463	0.461373	0.989281
ENSG00000065357 (DGKA)	ENSG00000065357	DGKA	diacylglycerol kinase alpha	0.12175	3.70417	0.688884	0.99492
ENSG00000065361 (ERBB3)	ENSG00000065361	ERBB3	erb-b2 receptor tyrosine kinase 3	-0.277499	7.0323	0.0958588	0.875335
ENSG00000065413 (ANKRD44)	ENSG00000065413	ANKRD44	ankyrin repeat domain 44	-0.0863329	4.89739	0.686093	0.99492
ENSG00000065427 (KARS1)	ENSG00000065427	KARS1	lysyl-tRNA synthetase 1	0.109054	5.87813	0.272928	0.966893
ENSG00000065457 (ADAT1)	ENSG00000065457	ADAT1	adenosine deaminase tRNA specific 1	0.252714	4.60061	0.0726642	0.852233
ENSG00000065485 (PDIA5)	ENSG00000065485	PDIA5	protein disulfide isomerase family A member 5	0.236978	4.35743	0.0588683	0.83195
ENSG00000065491 (TBC1D22B)	ENSG00000065491	TBC1D22B	TBC1 domain family member 22B	0.0501028	4.4423	0.642028	0.99492
ENSG00000065518 (NDUFB4)	ENSG00000065518	NDUFB4	NADH:ubiquinone oxidoreductase subunit B4	0.0746862	5.49977	0.589705	0.99492
ENSG00000065526 (SPEN)	ENSG00000065526	SPEN	spen family transcriptional repressor	0.030112	7.80267	0.79454	0.998396
ENSG00000065534 (MYLK)	ENSG00000065534	MYLK	myosin light chain kinase	-0.227644	7.90762	0.131708	0.903594
ENSG00000065548 (ZC3H15)	ENSG00000065548	ZC3H15	zinc finger CCCH-type containing 15	0.00317058	5.35497	0.973493	0.998939
ENSG00000065559 (MAP2K4)	ENSG00000065559	MAP2K4	mitogen-activated protein kinase kinase 4	0.0526038	5.01557	0.649028	0.99492
ENSG00000065600 (PACC1)	ENSG00000065600	PACC1	proton activated chloride channel 1	0.243029	3.60532	0.288373	0.971453
ENSG00000065613 (SLK)	ENSG00000065613	SLK	STE20 like kinase	0.0760558	6.84478	0.422082	0.989281
ENSG00000065615 (CYB5R4)	ENSG00000065615	CYB5R4	cytochrome b5 reductase 4	0.266763	3.9779	0.0775325	0.85859
ENSG00000065621 (GSTO2)	ENSG00000065621	GSTO2	glutathione S-transferase omega 2	-0.00517454	4.25297	0.973559	0.998939
ENSG00000065665 (SEC61A2)	ENSG00000065665	SEC61A2	SEC61 translocon alpha 2 subunit	0.171209	2.77867	0.27071	0.965661
ENSG00000065675 (PRKCQ)	ENSG00000065675	PRKCQ	protein kinase C theta	-0.168827	3.04258	0.673196	0.99492
ENSG00000065717 (TLE2)	ENSG00000065717	TLE2	TLE family member 2, transcriptional corepressor	-0.120565	5.16825	0.348506	0.983375
ENSG00000065802 (ASB1)	ENSG00000065802	ASB1	ankyrin repeat and SOCS box containing 1	0.0222187	5.20455	0.828798	0.998725
ENSG00000065809 (FAM107B)	ENSG00000065809	FAM107B	family with sequence similarity 107 member B	0.283012	7.42215	0.230762	0.951195
ENSG00000065833 (ME1)	ENSG00000065833	ME1	malic enzyme 1	0.275295	2.54423	0.247789	0.954601
ENSG00000065882 (TBC1D1)	ENSG00000065882	TBC1D1	TBC1 domain family member 1	0.0198328	7.7112	0.850942	0.998725
ENSG00000065883 (CDK13)	ENSG00000065883	CDK13	cyclin dependent kinase 13	-0.0318081	6.65265	0.770565	0.996756
ENSG00000065911 (MTHFD2)	ENSG00000065911	MTHFD2	methylenetetrahydrofolate dehydrogenase (NADP+ dependent) 2, methenyltetrahydrofolate cyclohydrolase	0.0556315	4.14282	0.840589	0.998725
ENSG00000065923 (SLC9A7)	ENSG00000065923	SLC9A7	solute carrier family 9 member A7	-0.128641	4.70669	0.35882	0.983758
ENSG00000065970 (FOXJ2)	ENSG00000065970	FOXJ2	forkhead box J2	-0.000718184	5.01316	0.99514	0.998939
ENSG00000065978 (YBX1)	ENSG00000065978	YBX1	Y-box binding protein 1	0.112268	7.62529	0.339214	0.980657
ENSG00000065989 (PDE4A)	ENSG00000065989	PDE4A	phosphodiesterase 4A	0.00545755	4.07704	0.97294	0.998939
ENSG00000066027 (PPP2R5A)	ENSG00000066027	PPP2R5A	protein phosphatase 2 regulatory subunit B'alpha	-0.073377	5.56649	0.46969	0.989281
ENSG00000066044 (ELAVL1)	ENSG00000066044	ELAVL1	ELAV like RNA binding protein 1	0.038423	5.70158	0.669542	0.99492
ENSG00000066056 (TIE1)	ENSG00000066056	TIE1	tyrosine kinase with immunoglobulin like and EGF like domains 1	-0.218112	4.69822	0.387017	0.98756
ENSG00000066084 (DIP2B)	ENSG00000066084	DIP2B	disco interacting protein 2 homolog B	0.148984	6.17552	0.152339	0.920776
ENSG00000066117 (SMARCD1)	ENSG00000066117	SMARCD1	SWI/SNF related, matrix associated, actin dependent regulator of chromatin, subfamily d, member 1	0.127215	5.69176	0.179633	0.927005
ENSG00000066135 (KDM4A)	ENSG00000066135	KDM4A	lysine demethylase 4A	-0.110345	5.7547	0.295451	0.971453
ENSG00000066136 (NFYC)	ENSG00000066136	NFYC	nuclear transcription factor Y subunit gamma	-0.0641501	5.46007	0.586439	0.99492
ENSG00000066185 (ZMYND12)	ENSG00000066185	ZMYND12	zinc finger MYND-type containing 12	-0.468377	1.67591	0.130586	0.90314
ENSG00000066230 (SLC9A3)	ENSG00000066230	SLC9A3	solute carrier family 9 member A3	-0.520521	7.48295	0.138103	0.906621
ENSG00000066248 (NGEF)	ENSG00000066248	NGEF	neuronal guanine nucleotide exchange factor	-0.252659	3.85237	0.329283	0.978767
ENSG00000066279 (ASPM)	ENSG00000066279	ASPM	abnormal spindle microtubule assembly	-0.694437	1.27345	0.171866	0.926446
ENSG00000066294 (CD84)	ENSG00000066294	CD84	CD84 molecule	-0.258793	3.78039	0.428131	0.989281
ENSG00000066322 (ELOVL1)	ENSG00000066322	ELOVL1	ELOVL fatty acid elongase 1	0.280007	5.29459	0.0376033	0.780503
ENSG00000066336 (SPI1)	ENSG00000066336	SPI1	Spi-1 proto-oncogene	0.0575715	3.25376	0.85326	0.998725
ENSG00000066379 (ZNRD1)	ENSG00000066379	ZNRD1	zinc ribbon domain containing 1	-0.350318	1.20771	0.627211	0.99492
ENSG00000066382 (MPPED2)	ENSG00000066382	MPPED2	metallophosphoesterase domain containing 2	0.094462	4.41259	0.679439	0.99492
ENSG00000066422 (ZBTB11)	ENSG00000066422	ZBTB11	zinc finger and BTB domain containing 11	-0.143429	4.75874	0.207957	0.943542
ENSG00000066427 (ATXN3)	ENSG00000066427	ATXN3	ataxin 3	0.060951	5.04574	0.681141	0.99492
ENSG00000066455 (GOLGA5)	ENSG00000066455	GOLGA5	golgin A5	0.10255	4.9455	0.318813	0.976809
ENSG00000066468 (FGFR2)	ENSG00000066468	FGFR2	fibroblast growth factor receptor 2	0.0283938	6.6024	0.896007	0.998725
ENSG00000066557 (LRRC40)	ENSG00000066557	LRRC40	leucine rich repeat containing 40	0.0496903	3.67686	0.781329	0.997994
ENSG00000066583 (ISOC1)	ENSG00000066583	ISOC1	isochorismatase domain containing 1	-0.144652	4.15988	0.372108	0.984803
ENSG00000066629 (EML1)	ENSG00000066629	EML1	EMAP like 1	-0.109646	4.63054	0.493295	0.994432
ENSG00000066651 (TRMT11)	ENSG00000066651	TRMT11	tRNA methyltransferase 11 homolog	0.151513	4.36265	0.297169	0.971641
ENSG00000066654 (THUMPD1)	ENSG00000066654	THUMPD1	THUMP domain containing 1	0.0499692	5.77375	0.726871	0.99492
ENSG00000066697 (MSANTD3)	ENSG00000066697	MSANTD3	Myb/SANT DNA binding domain containing 3	0.121785	3.30942	0.578127	0.99492
ENSG00000066735 (KIF26A)	ENSG00000066735	KIF26A	kinesin family member 26A	-0.471538	3.33703	0.0808748	0.864523
ENSG00000066739 (ATG2B)	ENSG00000066739	ATG2B	autophagy related 2B	0.00337029	6.52186	0.977875	0.998939
ENSG00000066777 (ARFGEF1)	ENSG00000066777	ARFGEF1	ADP ribosylation factor guanine nucleotide exchange factor 1	0.0355108	7.29074	0.717687	0.99492
ENSG00000066813 (ACSM2B)	ENSG00000066813	ACSM2B	acyl-CoA synthetase medium chain family member 2B	0.000395811	9.04037	0.998753	0.999654
ENSG00000066827 (ZFAT)	ENSG00000066827	ZFAT	zinc finger and AT-hook domain containing	-0.77442	6.05602	0.0460239	0.804572
ENSG00000066855 (MTFR1)	ENSG00000066855	MTFR1	mitochondrial fission regulator 1	0.0706003	4.79331	0.537561	0.99492
ENSG00000066923 (STAG3)	ENSG00000066923	STAG3	stromal antigen 3	0.150481	2.8284	0.424608	0.989281
ENSG00000066926 (FECH)	ENSG00000066926	FECH	ferrochelatase	-0.392622	5.61186	0.218821	0.947445
ENSG00000066933 (MYO9A)	ENSG00000066933	MYO9A	myosin IXA	-0.0358025	7.61187	0.829723	0.998725
ENSG00000067048 (DDX3Y)	ENSG00000067048	DDX3Y	DEAD-box helicase 3 Y-linked	-0.0196631	4.63306	0.936458	0.998939
ENSG00000067057 (PFKP)	ENSG00000067057	PFKP	phosphofructokinase, platelet	0.30883	6.17041	0.276413	0.967339
ENSG00000067064 (IDI1)	ENSG00000067064	IDI1	isopentenyl-diphosphate delta isomerase 1	-0.260451	4.50557	0.214871	0.945496
ENSG00000067066 (SP100)	ENSG00000067066	SP100	SP100 nuclear antigen	0.110935	6.21097	0.477631	0.989506
ENSG00000067082 (KLF6)	ENSG00000067082	KLF6	Kruppel like factor 6	0.327295	7.36614	0.349298	0.983375
ENSG00000067113 (PLPP1)	ENSG00000067113	PLPP1	phospholipid phosphatase 1	0.064804	5.83374	0.759583	0.995009
ENSG00000067141 (NEO1)	ENSG00000067141	NEO1	neogenin 1	0.0847775	6.70052	0.401948	0.987767
ENSG00000067167 (TRAM1)	ENSG00000067167	TRAM1	translocation associated membrane protein 1	0.315749	6.78244	0.10193	0.887519
ENSG00000067177 (PHKA1)	ENSG00000067177	PHKA1	phosphorylase kinase regulatory subunit alpha 1	0.117758	3.31187	0.449462	0.989281
ENSG00000067182 (TNFRSF1A)	ENSG00000067182	TNFRSF1A	TNF receptor superfamily member 1A	0.321483	6.94423	0.0842072	0.864726
ENSG00000067191 (CACNB1)	ENSG00000067191	CACNB1	calcium voltage-gated channel auxiliary subunit beta 1	0.44347	2.32367	0.0650987	0.845644
ENSG00000067208 (EVI5)	ENSG00000067208	EVI5	ecotropic viral integration site 5	0.0466994	5.50226	0.676273	0.99492
ENSG00000067221 (STOML1)	ENSG00000067221	STOML1	stomatin like 1	0.187189	3.40072	0.241077	0.953502
ENSG00000067225 (PKM)	ENSG00000067225	PKM	pyruvate kinase M1/2	0.334479	9.10849	0.0714779	0.852047
ENSG00000067248 (DHX29)	ENSG00000067248	DHX29	DExH-box helicase 29	0.0848891	5.47966	0.422234	0.989281
ENSG00000067334 (DNTTIP2)	ENSG00000067334	DNTTIP2	deoxynucleotidyltransferase terminal interacting protein 2	0.0544118	4.89377	0.644994	0.99492
ENSG00000067365 (METTL22)	ENSG00000067365	METTL22	methyltransferase like 22	0.0996939	4.23406	0.438997	0.989281
ENSG00000067369 (TP53BP1)	ENSG00000067369	TP53BP1	tumor protein p53 binding protein 1	0.03517	6.73936	0.698229	0.99492
ENSG00000067445 (TRO)	ENSG00000067445	TRO	trophinin	-0.149896	3.69666	0.43775	0.989281
ENSG00000067533 (RRP15)	ENSG00000067533	RRP15	ribosomal RNA processing 15 homolog	0.0926063	4.0365	0.578268	0.99492
ENSG00000067560 (RHOA)	ENSG00000067560	RHOA	ras homolog family member A	0.113778	7.92116	0.271242	0.965762
ENSG00000067596 (DHX8)	ENSG00000067596	DHX8	DEAH-box helicase 8	0.165795	5.58772	0.0645829	0.845644
ENSG00000067601 (PMS2P4)	ENSG00000067601	PMS2P4	PMS1 homolog 2, mismatch repair system component pseudogene 4	0.0523702	3.00663	0.769581	0.996679
ENSG00000067606 (PRKCZ)	ENSG00000067606	PRKCZ	protein kinase C zeta	-0.052088	5.11662	0.769949	0.996679
ENSG00000067646 (ZFY)	ENSG00000067646	ZFY	zinc finger protein Y-linked	-0.144394	2.67975	0.639933	0.99492
ENSG00000067704 (IARS2)	ENSG00000067704	IARS2	isoleucyl-tRNA synthetase 2, mitochondrial	-0.107051	6.35042	0.350143	0.983375
ENSG00000067715 (SYT1)	ENSG00000067715	SYT1	synaptotagmin 1	-0.503618	0.927116	0.170625	0.926446
ENSG00000067798 (NAV3)	ENSG00000067798	NAV3	neuron navigator 3	0.448515	2.66967	0.295957	0.971453
ENSG00000067829 (IDH3G)	ENSG00000067829	IDH3G	isocitrate dehydrogenase (NAD(+)) 3 non-catalytic subunit gamma	0.0815178	5.37701	0.362293	0.984616
ENSG00000067836 (ROGDI)	ENSG00000067836	ROGDI	rogdi atypical leucine zipper	-0.332115	4.39151	0.0472113	0.809779
ENSG00000067840 (PDZD4)	ENSG00000067840	PDZD4	PDZ domain containing 4	-0.21484	2.13119	0.39108	0.98756
ENSG00000067842 (ATP2B3)	ENSG00000067842	ATP2B3	ATPase plasma membrane Ca2+ transporting 3	-1.46006	-0.211436	0.126049	0.90314
ENSG00000067900 (ROCK1)	ENSG00000067900	ROCK1	Rho associated coiled-coil containing protein kinase 1	-0.0238294	6.85659	0.828353	0.998725
ENSG00000067955 (CBFB)	ENSG00000067955	CBFB	core-binding factor subunit beta	0.11568	4.61598	0.391757	0.98756
ENSG00000067992 (PDK3)	ENSG00000067992	PDK3	pyruvate dehydrogenase kinase 3	-0.191726	6.40104	0.262405	0.958426
ENSG00000068001 (HYAL2)	ENSG00000068001	HYAL2	hyaluronidase 2	0.331068	5.61295	0.0409024	0.791286
ENSG00000068024 (HDAC4)	ENSG00000068024	HDAC4	histone deacetylase 4	-0.0122316	5.60082	0.924831	0.998939
ENSG00000068028 (RASSF1)	ENSG00000068028	RASSF1	Ras association domain family member 1	0.21934	3.68482	0.279954	0.968639
ENSG00000068078 (FGFR3)	ENSG00000068078	FGFR3	fibroblast growth factor receptor 3	-0.324154	5.7053	0.120823	0.90314
ENSG00000068079 (IFI35)	ENSG00000068079	IFI35	interferon induced protein 35	0.326872	3.75546	0.0927856	0.874076
ENSG00000068097 (HEATR6)	ENSG00000068097	HEATR6	HEAT repeat containing 6	-0.0513124	4.33024	0.63037	0.99492
ENSG00000068120 (COASY)	ENSG00000068120	COASY	Coenzyme A synthase	-0.0810333	5.9383	0.531437	0.99492
ENSG00000068137 (PLEKHH3)	ENSG00000068137	PLEKHH3	pleckstrin homology, MyTH4 and FERM domain containing H3	-0.170656	4.28993	0.307539	0.973372
ENSG00000068305 (MEF2A)	ENSG00000068305	MEF2A	myocyte enhancer factor 2A	-0.053743	6.33038	0.646015	0.99492
ENSG00000068308 (OTUD5)	ENSG00000068308	OTUD5	OTU deubiquitinase 5	0.0854555	5.71729	0.430776	0.989281
ENSG00000068323 (TFE3)	ENSG00000068323	TFE3	transcription factor binding to IGHM enhancer 3	0.318397	6.01903	0.0160788	0.616149
ENSG00000068354 (TBC1D25)	ENSG00000068354	TBC1D25	TBC1 domain family member 25	0.0179911	3.82184	0.881871	0.998725
ENSG00000068366 (ACSL4)	ENSG00000068366	ACSL4	acyl-CoA synthetase long chain family member 4	0.0649033	6.8406	0.721976	0.99492
ENSG00000068383 (INPP5A)	ENSG00000068383	INPP5A	inositol polyphosphate-5-phosphatase A	-0.0247772	4.88035	0.830519	0.998725
ENSG00000068394 (GPKOW)	ENSG00000068394	GPKOW	G-patch domain and KOW motifs	0.00595527	3.93232	0.954572	0.998939
ENSG00000068400 (GRIPAP1)	ENSG00000068400	GRIPAP1	GRIP1 associated protein 1	0.160885	5.62187	0.122914	0.90314
ENSG00000068438 (FTSJ1)	ENSG00000068438	FTSJ1	FtsJ RNA 2'-O-methyltransferase 1	0.279914	3.76897	0.0606741	0.83477
ENSG00000068489 (PRR11)	ENSG00000068489	PRR11	proline rich 11	-0.209007	1.64358	0.499464	0.99492
ENSG00000068615 (REEP1)	ENSG00000068615	REEP1	receptor accessory protein 1	0.0765958	2.23421	0.808717	0.998396
ENSG00000068650 (ATP11A)	ENSG00000068650	ATP11A	ATPase phospholipid transporting 11A	-0.112827	7.4115	0.551182	0.99492
ENSG00000068654 (POLR1A)	ENSG00000068654	POLR1A	RNA polymerase I subunit A	0.180224	6.44488	0.117186	0.899717
ENSG00000068697 (LAPTM4A)	ENSG00000068697	LAPTM4A	lysosomal protein transmembrane 4 alpha	0.166541	7.47619	0.234005	0.953245
ENSG00000068724 (TTC7A)	ENSG00000068724	TTC7A	tetratricopeptide repeat domain 7A	-0.00871795	5.37571	0.962843	0.998939
ENSG00000068745 (IP6K2)	ENSG00000068745	IP6K2	inositol hexakisphosphate kinase 2	0.151752	5.82283	0.276945	0.967339
ENSG00000068781 (STON1-GTF2A1L)	ENSG00000068781	STON1-GTF2A1L	STON1-GTF2A1L readthrough	0.380404	3.12486	0.677801	0.99492
ENSG00000068784 (SRBD1)	ENSG00000068784	SRBD1	S1 RNA binding domain 1	0.14035	4.34183	0.186627	0.929403
ENSG00000068796 (KIF2A)	ENSG00000068796	KIF2A	kinesin family member 2A	-0.0256304	4.88789	0.855792	0.998725
ENSG00000068831 (RASGRP2)	ENSG00000068831	RASGRP2	RAS guanyl releasing protein 2	-0.0875566	3.96827	0.764313	0.99539
ENSG00000068878 (PSME4)	ENSG00000068878	PSME4	proteasome activator subunit 4	0.126837	6.27336	0.196133	0.934145
ENSG00000068885 (IFT80)	ENSG00000068885	IFT80	intraflagellar transport 80	-0.0505566	4.87942	0.744515	0.995009
ENSG00000068903 (SIRT2)	ENSG00000068903	SIRT2	sirtuin 2	0.00824285	5.33694	0.939428	0.998939
ENSG00000068912 (ERLEC1)	ENSG00000068912	ERLEC1	endoplasmic reticulum lectin 1	0.0812842	4.90828	0.412089	0.988956
ENSG00000068971 (PPP2R5B)	ENSG00000068971	PPP2R5B	protein phosphatase 2 regulatory subunit B'beta	0.0755397	4.48549	0.632447	0.99492
ENSG00000068976 (PYGM)	ENSG00000068976	PYGM	glycogen phosphorylase, muscle associated	-0.515166	1.9422	0.0187225	0.643494
ENSG00000069018 (TRPC7)	ENSG00000069018	TRPC7	transient receptor potential cation channel subfamily C member 7	-0.587085	0.524705	0.393015	0.98756
ENSG00000069020 (MAST4)	ENSG00000069020	MAST4	microtubule associated serine/threonine kinase family member 4	-0.108243	7.2089	0.376953	0.986205
ENSG00000069122 (ADGRF5)	ENSG00000069122	ADGRF5	adhesion G protein-coupled receptor F5	-0.0419777	8.25377	0.866434	0.998725
ENSG00000069188 (SDK2)	ENSG00000069188	SDK2	sidekick cell adhesion molecule 2	-0.0162061	2.90983	0.932486	0.998939
ENSG00000069248 (NUP133)	ENSG00000069248	NUP133	nucleoporin 133	0.058402	5.15581	0.559291	0.99492
ENSG00000069275 (NUCKS1)	ENSG00000069275	NUCKS1	nuclear casein kinase and cyclin dependent kinase substrate 1	-0.104512	7.89811	0.482714	0.99222
ENSG00000069329 (VPS35)	ENSG00000069329	VPS35	VPS35 retromer complex component	0.0907022	6.3178	0.409372	0.988956
ENSG00000069345 (DNAJA2)	ENSG00000069345	DNAJA2	DnaJ heat shock protein family (Hsp40) member A2	0.0188379	5.70412	0.850351	0.998725
ENSG00000069399 (BCL3)	ENSG00000069399	BCL3	BCL3 transcription coactivator	0.340093	4.9629	0.313916	0.97436
ENSG00000069424 (KCNAB2)	ENSG00000069424	KCNAB2	potassium voltage-gated channel subfamily A regulatory beta subunit 2	-0.091267	6.66416	0.78186	0.997994
ENSG00000069431 (ABCC9)	ENSG00000069431	ABCC9	ATP binding cassette subfamily C member 9	-0.486918	5.54956	0.0525493	0.822528
ENSG00000069493 (CLEC2D)	ENSG00000069493	CLEC2D	C-type lectin domain family 2 member D	0.0919492	3.4181	0.791621	0.998396
ENSG00000069509 (FUNDC1)	ENSG00000069509	FUNDC1	FUN14 domain containing 1	0.178006	2.67138	0.288441	0.971453
ENSG00000069535 (MAOB)	ENSG00000069535	MAOB	monoamine oxidase B	-0.402914	6.63625	0.112974	0.89684
ENSG00000069667 (RORA)	ENSG00000069667	RORA	RAR related orphan receptor A	-0.0608185	6.35491	0.735554	0.994988
ENSG00000069696 (DRD4)	ENSG00000069696	DRD4	dopamine receptor D4	-0.124146	-0.241511	0.878646	0.998725
ENSG00000069702 (TGFBR3)	ENSG00000069702	TGFBR3	transforming growth factor beta receptor 3	0.013336	6.92456	0.925282	0.998939
ENSG00000069812 (HES2)	ENSG00000069812	HES2	hes family bHLH transcription factor 2	-0.325565	2.19692	0.250031	0.955813
ENSG00000069849 (ATP1B3)	ENSG00000069849	ATP1B3	ATPase Na+/K+ transporting subunit beta 3	0.250939	5.4542	0.233973	0.953245
ENSG00000069869 (NEDD4)	ENSG00000069869	NEDD4	NEDD4 E3 ubiquitin protein ligase	0.0498203	5.73575	0.607826	0.99492
ENSG00000069943 (PIGB)	ENSG00000069943	PIGB	phosphatidylinositol glycan anchor biosynthesis class B	0.217278	3.04639	0.215573	0.945496
ENSG00000069956 (MAPK6)	ENSG00000069956	MAPK6	mitogen-activated protein kinase 6	0.177907	5.17927	0.261371	0.957807
ENSG00000069966 (GNB5)	ENSG00000069966	GNB5	G protein subunit beta 5	-0.166601	5.42324	0.208464	0.943542
ENSG00000069974 (RAB27A)	ENSG00000069974	RAB27A	RAB27A, member RAS oncogene family	0.153938	4.02056	0.382476	0.98715
ENSG00000069998 (HDHD5)	ENSG00000069998	HDHD5	haloacid dehalogenase like hydrolase domain containing 5	0.0128642	4.57289	0.904803	0.998725
ENSG00000070010 (UFD1)	ENSG00000070010	UFD1	ubiquitin recognition factor in ER associated degradation 1	0.313775	4.99963	0.00575004	0.430318
ENSG00000070018 (LRP6)	ENSG00000070018	LRP6	LDL receptor related protein 6	-0.0518017	6.78328	0.749122	0.995009
ENSG00000070047 (PHRF1)	ENSG00000070047	PHRF1	PHD and ring finger domains 1	-3.00643	1.74479	0.107606	0.893897
ENSG00000070061 (ELP1)	ENSG00000070061	ELP1	elongator complex protein 1	-0.0839135	5.50679	0.342024	0.981072
ENSG00000070081 (NUCB2)	ENSG00000070081	NUCB2	nucleobindin 2	0.0706682	4.98378	0.554	0.99492
ENSG00000070087 (PFN2)	ENSG00000070087	PFN2	profilin 2	-0.0690488	5.98225	0.588281	0.99492
ENSG00000070159 (PTPN3)	ENSG00000070159	PTPN3	protein tyrosine phosphatase non-receptor type 3	-0.0279921	7.00315	0.788825	0.998396
ENSG00000070182 (SPTB)	ENSG00000070182	SPTB	spectrin beta, erythrocytic	0.00105129	4.17132	0.995692	0.998939
ENSG00000070190 (DAPP1)	ENSG00000070190	DAPP1	dual adaptor of phosphotyrosine and 3-phosphoinositides 1	0.0753227	0.836001	0.863879	0.998725
ENSG00000070193 (FGF10)	ENSG00000070193	FGF10	fibroblast growth factor 10	-0.936394	0.209892	0.146647	0.915199
ENSG00000070214 (SLC44A1)	ENSG00000070214	SLC44A1	solute carrier family 44 member 1	-0.1344	6.3137	0.252628	0.955813
ENSG00000070269 (TMEM260)	ENSG00000070269	TMEM260	transmembrane protein 260	-0.136374	4.51172	0.349646	0.983375
ENSG00000070366 (SMG6)	ENSG00000070366	SMG6	SMG6 nonsense mediated mRNA decay factor	-0.0340344	6.13087	0.747782	0.995009
ENSG00000070367 (EXOC5)	ENSG00000070367	EXOC5	exocyst complex component 5	0.0755217	5.7444	0.598524	0.99492
ENSG00000070371 (CLTCL1)	ENSG00000070371	CLTCL1	clathrin heavy chain like 1	-0.0162445	3.58267	0.922367	0.998939
ENSG00000070388 (FGF22)	ENSG00000070388	FGF22	fibroblast growth factor 22	-0.379183	-0.240169	0.23265	0.953166
ENSG00000070404 (FSTL3)	ENSG00000070404	FSTL3	follistatin like 3	0.627521	5.02053	0.0533298	0.82259
ENSG00000070413 (DGCR2)	ENSG00000070413	DGCR2	DiGeorge syndrome critical region gene 2	-0.0312114	6.46996	0.763841	0.995384
ENSG00000070423 (RNF126)	ENSG00000070423	RNF126	ring finger protein 126	0.161487	4.38236	0.24299	0.953502
ENSG00000070444 (MNT)	ENSG00000070444	MNT	MAX network transcriptional repressor	-0.00497482	5.57742	0.969647	0.998939
ENSG00000070476 (ZXDC)	ENSG00000070476	ZXDC	ZXD family zinc finger C	0.114015	5.92777	0.283109	0.970364
ENSG00000070495 (JMJD6)	ENSG00000070495	JMJD6	jumonji domain containing 6, arginine demethylase and lysine hydroxylase	-0.00424248	4.03638	0.978661	0.998939
ENSG00000070501 (POLB)	ENSG00000070501	POLB	DNA polymerase beta	-0.00393001	2.89977	0.979196	0.998939
ENSG00000070540 (WIPI1)	ENSG00000070540	WIPI1	WD repeat domain, phosphoinositide interacting 1	0.373952	5.13985	0.000989697	0.2264
ENSG00000070601 (FRMPD1)	ENSG00000070601	FRMPD1	FERM and PDZ domain containing 1	-0.0577416	1.64762	0.847531	0.998725
ENSG00000070610 (GBA2)	ENSG00000070610	GBA2	glucosylceramidase beta 2	-0.0461858	6.83499	0.661418	0.99492
ENSG00000070614 (NDST1)	ENSG00000070614	NDST1	N-deacetylase and N-sulfotransferase 1	0.0270982	7.18127	0.850183	0.998725
ENSG00000070669 (ASNS)	ENSG00000070669	ASNS	asparagine synthetase (glutamine-hydrolyzing)	-0.269471	2.78532	0.338065	0.980657
ENSG00000070718 (AP3M2)	ENSG00000070718	AP3M2	adaptor related protein complex 3 subunit mu 2	-0.151863	4.33474	0.215684	0.945496
ENSG00000070731 (ST6GALNAC2)	ENSG00000070731	ST6GALNAC2	ST6 N-acetylgalactosaminide alpha-2,6-sialyltransferase 2	0.293815	3.72614	0.0865475	0.864726
ENSG00000070756 (PABPC1)	ENSG00000070756	PABPC1	poly(A) binding protein cytoplasmic 1	-0.135272	8.34263	0.327206	0.978328
ENSG00000070759 (TESK2)	ENSG00000070759	TESK2	testis associated actin remodelling kinase 2	-0.362205	1.99925	0.196987	0.935124
ENSG00000070761 (CFAP20)	ENSG00000070761	CFAP20	cilia and flagella associated protein 20	-0.0532426	2.9965	0.722948	0.99492
ENSG00000070770 (CSNK2A2)	ENSG00000070770	CSNK2A2	casein kinase 2 alpha 2	0.0851866	5.88989	0.43831	0.989281
ENSG00000070778 (PTPN21)	ENSG00000070778	PTPN21	protein tyrosine phosphatase non-receptor type 21	0.0120512	5.63198	0.905194	0.998725
ENSG00000070785 (EIF2B3)	ENSG00000070785	EIF2B3	eukaryotic translation initiation factor 2B subunit gamma	0.0489954	3.48446	0.693578	0.99492
ENSG00000070808 (CAMK2A)	ENSG00000070808	CAMK2A	calcium/calmodulin dependent protein kinase II alpha	-0.0778176	2.00055	0.841934	0.998725
ENSG00000070814 (TCOF1)	ENSG00000070814	TCOF1	treacle ribosome biogenesis factor 1	0.107599	5.24238	0.357191	0.983713
ENSG00000070831 (CDC42)	ENSG00000070831	CDC42	cell division cycle 42	0.138465	7.46926	0.232203	0.9529
ENSG00000070882 (OSBPL3)	ENSG00000070882	OSBPL3	oxysterol binding protein like 3	0.014694	5.69786	0.93882	0.998939
ENSG00000070915 (SLC12A3)	ENSG00000070915	SLC12A3	solute carrier family 12 member 3	-0.289448	8.82087	0.420778	0.989281
ENSG00000070950 (RAD18)	ENSG00000070950	RAD18	RAD18 E3 ubiquitin protein ligase	0.23812	2.9484	0.141482	0.912063
ENSG00000070961 (ATP2B1)	ENSG00000070961	ATP2B1	ATPase plasma membrane Ca2+ transporting 1	0.0108662	5.86113	0.913189	0.998725
ENSG00000070985 (TRPM5)	ENSG00000070985	TRPM5	transient receptor potential cation channel subfamily M member 5	-0.258067	0.823361	0.448602	0.989281
ENSG00000071051 (NCK2)	ENSG00000071051	NCK2	NCK adaptor protein 2	-0.105769	5.15263	0.356596	0.983713
ENSG00000071054 (MAP4K4)	ENSG00000071054	MAP4K4	mitogen-activated protein kinase kinase kinase kinase 4	0.0636495	6.39528	0.765019	0.995526
ENSG00000071073 (MGAT4A)	ENSG00000071073	MGAT4A	alpha-1,3-mannosyl-glycoprotein 4-beta-N-acetylglucosaminyltransferase A	-0.235637	6.5544	0.169084	0.926446
ENSG00000071082 (RPL31)	ENSG00000071082	RPL31	ribosomal protein L31	-0.110441	7.11897	0.35211	0.983375
ENSG00000071127 (WDR1)	ENSG00000071127	WDR1	WD repeat domain 1	0.125491	7.88071	0.228744	0.949561
ENSG00000071189 (SNX13)	ENSG00000071189	SNX13	sorting nexin 13	0.0652864	6.15267	0.6325	0.99492
ENSG00000071205 (ARHGAP10)	ENSG00000071205	ARHGAP10	Rho GTPase activating protein 10	0.199707	5.57471	0.340614	0.980657
ENSG00000071242 (RPS6KA2)	ENSG00000071242	RPS6KA2	ribosomal protein S6 kinase A2	0.0350043	6.03821	0.734065	0.994974
ENSG00000071243 (ING3)	ENSG00000071243	ING3	inhibitor of growth family member 3	0.110678	3.38402	0.528687	0.99492
ENSG00000071246 (VASH1)	ENSG00000071246	VASH1	vasohibin 1	-0.0952182	4.57036	0.68795	0.99492
ENSG00000071282 (LMCD1)	ENSG00000071282	LMCD1	LIM and cysteine rich domains 1	-0.0443071	4.7706	0.874015	0.998725
ENSG00000071462 (BUD23)	ENSG00000071462	BUD23	BUD23 rRNA methyltransferase and ribosome maturation factor	0.187655	5.10039	0.0856659	0.864726
ENSG00000071537 (SEL1L)	ENSG00000071537	SEL1L	SEL1L adaptor subunit of ERAD E3 ubiquitin ligase	0.0489629	7.09614	0.687777	0.99492
ENSG00000071539 (TRIP13)	ENSG00000071539	TRIP13	thyroid hormone receptor interactor 13	-0.110193	1.06503	0.706484	0.99492
ENSG00000071553 (ATP6AP1)	ENSG00000071553	ATP6AP1	ATPase H+ transporting accessory protein 1	-0.0392185	6.72048	0.713802	0.99492
ENSG00000071564 (TCF3)	ENSG00000071564	TCF3	transcription factor 3	-0.0379179	4.97043	0.805139	0.998396
ENSG00000071575 (TRIB2)	ENSG00000071575	TRIB2	tribbles pseudokinase 2	0.15043	6.29814	0.364551	0.984616
ENSG00000071626 (DAZAP1)	ENSG00000071626	DAZAP1	DAZ associated protein 1	0.194726	6.70571	0.0525826	0.822528
ENSG00000071655 (MBD3)	ENSG00000071655	MBD3	methyl-CpG binding domain protein 3	-0.0203584	5.91066	0.881696	0.998725
ENSG00000071794 (HLTF)	ENSG00000071794	HLTF	helicase like transcription factor	-0.0951294	4.94153	0.555907	0.99492
ENSG00000071859 (FAM50A)	ENSG00000071859	FAM50A	family with sequence similarity 50 member A	0.10107	5.10082	0.504614	0.99492
ENSG00000071889 (FAM3A)	ENSG00000071889	FAM3A	FAM3 metabolism regulating signaling molecule A	-0.0930407	4.89335	0.421518	0.989281
ENSG00000071894 (CPSF1)	ENSG00000071894	CPSF1	cleavage and polyadenylation specific factor 1	0.219307	6.10809	0.203215	0.940134
ENSG00000071909 (MYO3B)	ENSG00000071909	MYO3B	myosin IIIB	-0.81499	3.94903	0.01173	0.560441
ENSG00000071967 (CYBRD1)	ENSG00000071967	CYBRD1	cytochrome b reductase 1	-0.646816	5.82379	0.00817959	0.491941
ENSG00000071991 (CDH19)	ENSG00000071991	CDH19	cadherin 19	-0.197024	0.585287	0.698857	0.99492
ENSG00000071994 (PDCD2)	ENSG00000071994	PDCD2	programmed cell death 2	0.167464	4.65354	0.175298	0.926446
ENSG00000072041 (SLC6A15)	ENSG00000072041	SLC6A15	solute carrier family 6 member 15	0.520706	-2.30443	0.452172	0.989281
ENSG00000072042 (RDH11)	ENSG00000072042	RDH11	retinol dehydrogenase 11	0.0742957	6.39272	0.567384	0.99492
ENSG00000072062 (PRKACA)	ENSG00000072062	PRKACA	protein kinase cAMP-activated catalytic subunit alpha	0.0193171	6.10053	0.814851	0.998396
ENSG00000072071 (ADGRL1)	ENSG00000072071	ADGRL1	adhesion G protein-coupled receptor L1	0.16978	5.20943	0.223771	0.948398
ENSG00000072110 (ACTN1)	ENSG00000072110	ACTN1	actinin alpha 1	0.154062	6.54617	0.458121	0.989281
ENSG00000072121 (ZFYVE26)	ENSG00000072121	ZFYVE26	zinc finger FYVE-type containing 26	0.0147317	6.21893	0.878772	0.998725
ENSG00000072133 (RPS6KA6)	ENSG00000072133	RPS6KA6	ribosomal protein S6 kinase A6	-0.214894	4.38037	0.36681	0.984616
ENSG00000072134 (EPN2)	ENSG00000072134	EPN2	epsin 2	-0.162333	5.41746	0.152668	0.920776
ENSG00000072135 (PTPN18)	ENSG00000072135	PTPN18	protein tyrosine phosphatase non-receptor type 18	0.153064	5.90213	0.154574	0.921589
ENSG00000072163 (LIMS2)	ENSG00000072163	LIMS2	LIM zinc finger domain containing 2	0.27224	5.64694	0.155329	0.921589
ENSG00000072195 (SPEG)	ENSG00000072195	SPEG	striated muscle enriched protein kinase	-0.0286672	3.52054	0.925351	0.998939
ENSG00000072201 (LNX1)	ENSG00000072201	LNX1	ligand of numb-protein X 1	-0.236878	4.06553	0.370684	0.984803
ENSG00000072210 (ALDH3A2)	ENSG00000072210	ALDH3A2	aldehyde dehydrogenase 3 family member A2	-0.150401	6.73526	0.309842	0.974153
ENSG00000072274 (TFRC)	ENSG00000072274	TFRC	transferrin receptor	-0.0434403	6.68266	0.859254	0.998725
ENSG00000072310 (SREBF1)	ENSG00000072310	SREBF1	sterol regulatory element binding transcription factor 1	-0.372463	6.26143	0.128263	0.90314
ENSG00000072315 (TRPC5)	ENSG00000072315	TRPC5	transient receptor potential cation channel subfamily C member 5	-0.0632576	-0.22126	0.907676	0.998725
ENSG00000072364 (AFF4)	ENSG00000072364	AFF4	AF4/FMR2 family member 4	0.107803	7.70866	0.287401	0.971453
ENSG00000072401 (UBE2D1)	ENSG00000072401	UBE2D1	ubiquitin conjugating enzyme E2 D1	-0.065868	2.42292	0.767973	0.996283
ENSG00000072415 (MPP5)	ENSG00000072415	MPP5	membrane palmitoylated protein 5	-0.120174	6.29454	0.363542	0.984616
ENSG00000072422 (RHOBTB1)	ENSG00000072422	RHOBTB1	Rho related BTB domain containing 1	0.636319	6.88251	0.0204064	0.653314
ENSG00000072501 (SMC1A)	ENSG00000072501	SMC1A	structural maintenance of chromosomes 1A	0.131364	6.90403	0.195544	0.933408
ENSG00000072506 (HSD17B10)	ENSG00000072506	HSD17B10	hydroxysteroid 17-beta dehydrogenase 10	0.0790489	5.17653	0.509133	0.99492
ENSG00000072518 (MARK2)	ENSG00000072518	MARK2	microtubule affinity regulating kinase 2	0.0830344	5.89187	0.379415	0.98683
ENSG00000072571 (HMMR)	ENSG00000072571	HMMR	hyaluronan mediated motility receptor	-0.918733	0.183127	0.0974508	0.880321
ENSG00000072609 (CHFR)	ENSG00000072609	CHFR	checkpoint with forkhead and ring finger domains	0.168639	5.50644	0.193924	0.933212
ENSG00000072657 (TRHDE)	ENSG00000072657	TRHDE	thyrotropin releasing hormone degrading enzyme	-0.127244	5.01357	0.471964	0.989281
ENSG00000072682 (P4HA2)	ENSG00000072682	P4HA2	prolyl 4-hydroxylase subunit alpha 2	0.177721	5.5938	0.399866	0.987767
ENSG00000072694 (FCGR2B)	ENSG00000072694	FCGR2B	Fc fragment of IgG receptor IIb	-0.95849	2.76973	0.0934095	0.87482
ENSG00000072736 (NFATC3)	ENSG00000072736	NFATC3	nuclear factor of activated T cells 3	-0.0092262	6.32027	0.938209	0.998939
ENSG00000072756 (TRNT1)	ENSG00000072756	TRNT1	tRNA nucleotidyl transferase 1	0.204106	4.16796	0.14743	0.915629
ENSG00000072778 (ACADVL)	ENSG00000072778	ACADVL	acyl-CoA dehydrogenase very long chain	0.307789	8.63106	0.136223	0.905973
ENSG00000072786 (STK10)	ENSG00000072786	STK10	serine/threonine kinase 10	0.0349511	5.08388	0.87074	0.998725
ENSG00000072803 (FBXW11)	ENSG00000072803	FBXW11	F-box and WD repeat domain containing 11	0.0458199	6.06211	0.69408	0.99492
ENSG00000072818 (ACAP1)	ENSG00000072818	ACAP1	ArfGAP with coiled-coil, ankyrin repeat and PH domains 1	0.139341	2.3406	0.765299	0.995526
ENSG00000072832 (CRMP1)	ENSG00000072832	CRMP1	collapsin response mediator protein 1	0.439274	0.380377	0.259279	0.957807
ENSG00000072840 (EVC)	ENSG00000072840	EVC	EvC ciliary complex subunit 1	0.20796	7.88643	0.170722	0.926446
ENSG00000072849 (DERL2)	ENSG00000072849	DERL2	derlin 2	0.149394	4.70848	0.24195	0.953502
ENSG00000072858 (SIDT1)	ENSG00000072858	SIDT1	SID1 transmembrane family member 1	0.110732	2.21553	0.793793	0.998396
ENSG00000072864 (NDE1)	ENSG00000072864	NDE1	nudE neurodevelopment protein 1	-0.122804	3.3044	0.795182	0.998396
ENSG00000072952 (MRVI1)	ENSG00000072952	MRVI1	murine retrovirus integration site 1 homolog	-0.165094	5.16717	0.42952	0.989281
ENSG00000072954 (TMEM38A)	ENSG00000072954	TMEM38A	transmembrane protein 38A	-0.290977	3.08562	0.130113	0.90314
ENSG00000072958 (AP1M1)	ENSG00000072958	AP1M1	adaptor related protein complex 1 subunit mu 1	0.0137075	5.84456	0.904535	0.998725
ENSG00000073008 (PVR)	ENSG00000073008	PVR	PVR cell adhesion molecule	0.38933	6.08208	0.0472849	0.809779
ENSG00000073050 (XRCC1)	ENSG00000073050	XRCC1	X-ray repair cross complementing 1	-0.0307228	4.19436	0.788848	0.998396
ENSG00000073060 (SCARB1)	ENSG00000073060	SCARB1	scavenger receptor class B member 1	0.19819	4.15226	0.254849	0.955813
ENSG00000073111 (MCM2)	ENSG00000073111	MCM2	minichromosome maintenance complex component 2	0.289303	2.84581	0.303955	0.972309
ENSG00000073146 (MOV10L1)	ENSG00000073146	MOV10L1	Mov10 like RISC complex RNA helicase 1	0.696722	-0.303164	0.0406423	0.791286
ENSG00000073150 (PANX2)	ENSG00000073150	PANX2	pannexin 2	0.354604	2.38415	0.191381	0.931527
ENSG00000073169 (SELENOO)	ENSG00000073169	SELENOO	selenoprotein O	-0.0556485	4.84916	0.644299	0.99492
ENSG00000073282 (TP63)	ENSG00000073282	TP63	tumor protein p63	-0.103634	-0.215948	0.761	0.995009
ENSG00000073331 (ALPK1)	ENSG00000073331	ALPK1	alpha kinase 1	0.304593	5.08598	0.0239858	0.692028
ENSG00000073350 (LLGL2)	ENSG00000073350	LLGL2	LLGL scribble cell polarity complex component 2	-0.0762939	7.05769	0.529461	0.99492
ENSG00000073417 (PDE8A)	ENSG00000073417	PDE8A	phosphodiesterase 8A	0.051343	6.31343	0.630432	0.99492
ENSG00000073464 (CLCN4)	ENSG00000073464	CLCN4	chloride voltage-gated channel 4	-0.0332881	4.2288	0.871261	0.998725
ENSG00000073536 (NLE1)	ENSG00000073536	NLE1	notchless homolog 1	-0.0186249	3.01311	0.921485	0.998939
ENSG00000073578 (SDHA)	ENSG00000073578	SDHA	succinate dehydrogenase complex flavoprotein subunit A	-0.182885	7.53316	0.0818799	0.864726
ENSG00000073584 (SMARCE1)	ENSG00000073584	SMARCE1	SWI/SNF related, matrix associated, actin dependent regulator of chromatin, subfamily e, member 1	0.0747628	6.06532	0.457316	0.989281
ENSG00000073605 (GSDMB)	ENSG00000073605	GSDMB	gasdermin B	-0.341724	3.46547	0.0713575	0.852047
ENSG00000073614 (KDM5A)	ENSG00000073614	KDM5A	lysine demethylase 5A	0.0244849	6.93522	0.810397	0.998396
ENSG00000073670 (ADAM11)	ENSG00000073670	ADAM11	ADAM metallopeptidase domain 11	0.245249	-0.627244	0.618406	0.99492
ENSG00000073711 (PPP2R3A)	ENSG00000073711	PPP2R3A	protein phosphatase 2 regulatory subunit B''alpha	0.29847	7.47007	0.186101	0.929403
ENSG00000073712 (FERMT2)	ENSG00000073712	FERMT2	fermitin family member 2	0.164154	6.32357	0.0972833	0.880321
ENSG00000073756 (PTGS2)	ENSG00000073756	PTGS2	prostaglandin-endoperoxide synthase 2	-0.471419	2.11889	0.144969	0.913838
ENSG00000073792 (IGF2BP2)	ENSG00000073792	IGF2BP2	insulin like growth factor 2 mRNA binding protein 2	0.0985436	5.11065	0.445284	0.989281
ENSG00000073803 (MAP3K13)	ENSG00000073803	MAP3K13	mitogen-activated protein kinase kinase kinase 13	-0.00280719	5.89657	0.984618	0.998939
ENSG00000073849 (ST6GAL1)	ENSG00000073849	ST6GAL1	ST6 beta-galactoside alpha-2,6-sialyltransferase 1	-0.515265	7.46481	0.0485963	0.811165
ENSG00000073910 (FRY)	ENSG00000073910	FRY	FRY microtubule binding protein	-0.00679042	6.45578	0.968376	0.998939
ENSG00000073921 (PICALM)	ENSG00000073921	PICALM	phosphatidylinositol binding clathrin assembly protein	0.175811	7.91819	0.176486	0.926446
ENSG00000073969 (NSF)	ENSG00000073969	NSF	N-ethylmaleimide sensitive factor, vesicle fusing ATPase	0.13884	4.73578	0.684239	0.99492
ENSG00000074047 (GLI2)	ENSG00000074047	GLI2	GLI family zinc finger 2	0.0318082	2.63835	0.91819	0.998939
ENSG00000074054 (CLASP1)	ENSG00000074054	CLASP1	cytoplasmic linker associated protein 1	0.0511374	6.95124	0.5985	0.99492
ENSG00000074071 (MRPS34)	ENSG00000074071	MRPS34	mitochondrial ribosomal protein S34	-0.0881534	4.54637	0.42002	0.989281
ENSG00000074181 (NOTCH3)	ENSG00000074181	NOTCH3	notch receptor 3	-0.353088	7.38723	0.0129614	0.588901
ENSG00000074201 (CLNS1A)	ENSG00000074201	CLNS1A	chloride nucleotide-sensitive channel 1A	0.0264114	4.74494	0.793955	0.998396
ENSG00000074211 (PPP2R2C)	ENSG00000074211	PPP2R2C	protein phosphatase 2 regulatory subunit Bgamma	0.836693	0.96241	0.000129882	0.0826201
ENSG00000074219 (TEAD2)	ENSG00000074219	TEAD2	TEA domain transcription factor 2	0.0776056	4.34199	0.611046	0.99492
ENSG00000074266 (EED)	ENSG00000074266	EED	embryonic ectoderm development	-0.0698239	3.88069	0.680841	0.99492
ENSG00000074276 (CDHR2)	ENSG00000074276	CDHR2	cadherin related family member 2	-0.145827	5.4998	0.638633	0.99492
ENSG00000074319 (TSG101)	ENSG00000074319	TSG101	tumor susceptibility 101	0.218007	5.11693	0.0162384	0.616149
ENSG00000074356 (NCBP3)	ENSG00000074356	NCBP3	nuclear cap binding subunit 3	-0.0362604	6.07051	0.726637	0.99492
ENSG00000074370 (ATP2A3)	ENSG00000074370	ATP2A3	ATPase sarcoplasmic/endoplasmic reticulum Ca2+ transporting 3	-0.215281	4.28752	0.495956	0.994432
ENSG00000074410 (CA12)	ENSG00000074410	CA12	carbonic anhydrase 12	-0.396498	9.58509	0.0228129	0.681192
ENSG00000074416 (MGLL)	ENSG00000074416	MGLL	monoglyceride lipase	0.0419118	7.38467	0.838592	0.998725
ENSG00000074527 (NTN4)	ENSG00000074527	NTN4	netrin 4	-0.219941	7.04941	0.272516	0.966681
ENSG00000074582 (BCS1L)	ENSG00000074582	BCS1L	BCS1 homolog, ubiquinol-cytochrome c reductase complex chaperone	0.0727817	4.1739	0.575573	0.99492
ENSG00000074590 (NUAK1)	ENSG00000074590	NUAK1	NUAK family kinase 1	0.148487	4.80331	0.449308	0.989281
ENSG00000074603 (DPP8)	ENSG00000074603	DPP8	dipeptidyl peptidase 8	0.0932891	5.96963	0.445282	0.989281
ENSG00000074621 (SLC24A1)	ENSG00000074621	SLC24A1	solute carrier family 24 member 1	0.0493173	4.50987	0.682604	0.99492
ENSG00000074657 (ZNF532)	ENSG00000074657	ZNF532	zinc finger protein 532	-0.00914723	6.11664	0.947509	0.998939
ENSG00000074660 (SCARF1)	ENSG00000074660	SCARF1	scavenger receptor class F member 1	7.81623	1.71949	0.145669	0.914707
ENSG00000074695 (LMAN1)	ENSG00000074695	LMAN1	lectin, mannose binding 1	0.0140404	6.87233	0.914633	0.998725
ENSG00000074696 (HACD3)	ENSG00000074696	HACD3	3-hydroxyacyl-CoA dehydratase 3	0.0383211	6.21502	0.784024	0.998256
ENSG00000074706 (IPCEF1)	ENSG00000074706	IPCEF1	interaction protein for cytohesin exchange factors 1	-0.0469386	4.00905	0.850953	0.998725
ENSG00000074755 (ZZEF1)	ENSG00000074755	ZZEF1	zinc finger ZZ-type and EF-hand domain containing 1	0.0283529	7.28037	0.745398	0.995009
ENSG00000074800 (ENO1)	ENSG00000074800	ENO1	enolase 1	0.480131	9.28952	0.00116513	0.243727
ENSG00000074803 (SLC12A1)	ENSG00000074803	SLC12A1	solute carrier family 12 member 1	-1.1051	9.53807	0.0940994	0.875335
ENSG00000074842 (MYDGF)	ENSG00000074842	MYDGF	myeloid derived growth factor	0.186197	4.50126	0.156757	0.924145
ENSG00000074855 (ANO8)	ENSG00000074855	ANO8	anoctamin 8	0.139151	4.41127	0.382225	0.98715
ENSG00000074935 (TUBE1)	ENSG00000074935	TUBE1	tubulin epsilon 1	0.122967	3.862	0.47887	0.989855
ENSG00000074964 (ARHGEF10L)	ENSG00000074964	ARHGEF10L	Rho guanine nucleotide exchange factor 10 like	0.163461	7.16722	0.179221	0.927005
ENSG00000074966 (TXK)	ENSG00000074966	TXK	TXK tyrosine kinase	0.237402	1.9707	0.333681	0.980398
ENSG00000075035 (WSCD2)	ENSG00000075035	WSCD2	WSC domain containing 2	-0.136652	2.06084	0.700098	0.99492
ENSG00000075089 (ACTR6)	ENSG00000075089	ACTR6	actin related protein 6	0.0235134	3.35394	0.904906	0.998725
ENSG00000075131 (TIPIN)	ENSG00000075131	TIPIN	TIMELESS interacting protein	0.606647	1.85679	0.00360708	0.361175
ENSG00000075142 (SRI)	ENSG00000075142	SRI	sorcin	-0.00835844	4.72747	0.952572	0.998939
ENSG00000075151 (EIF4G3)	ENSG00000075151	EIF4G3	eukaryotic translation initiation factor 4 gamma 3	0.0886044	6.71093	0.37175	0.984803
ENSG00000075188 (NUP37)	ENSG00000075188	NUP37	nucleoporin 37	0.0113029	2.76061	0.938252	0.998939
ENSG00000075213 (SEMA3A)	ENSG00000075213	SEMA3A	semaphorin 3A	0.299163	0.361189	0.485367	0.993534
ENSG00000075218 (GTSE1)	ENSG00000075218	GTSE1	G2 and S-phase expressed 1	-0.292716	0.530188	0.590157	0.99492
ENSG00000075223 (SEMA3C)	ENSG00000075223	SEMA3C	semaphorin 3C	0.339465	4.79022	0.15954	0.926069
ENSG00000075234 (TTC38)	ENSG00000075234	TTC38	tetratricopeptide repeat domain 38	-0.1121	6.73232	0.542198	0.99492
ENSG00000075239 (ACAT1)	ENSG00000075239	ACAT1	acetyl-CoA acetyltransferase 1	-0.230835	7.4729	0.216642	0.945694
ENSG00000075240 (GRAMD4)	ENSG00000075240	GRAMD4	GRAM domain containing 4	0.303775	5.42162	0.00261765	0.320762
ENSG00000075275 (CELSR1)	ENSG00000075275	CELSR1	cadherin EGF LAG seven-pass G-type receptor 1	0.0929505	7.61923	0.634708	0.99492
ENSG00000075292 (ZNF638)	ENSG00000075292	ZNF638	zinc finger protein 638	0.018766	7.32214	0.869566	0.998725
ENSG00000075303 (SLC25A40)	ENSG00000075303	SLC25A40	solute carrier family 25 member 40	-0.0877653	3.63584	0.663726	0.99492
ENSG00000075336 (TIMM21)	ENSG00000075336	TIMM21	translocase of inner mitochondrial membrane 21	0.0408749	3.94747	0.777087	0.997965
ENSG00000075340 (ADD2)	ENSG00000075340	ADD2	adducin 2	0.197835	0.127464	0.593126	0.99492
ENSG00000075391 (RASAL2)	ENSG00000075391	RASAL2	RAS protein activator like 2	0.136316	6.1075	0.329708	0.978767
ENSG00000075399 (VPS9D1)	ENSG00000075399	VPS9D1	VPS9 domain containing 1	-0.0509446	4.42431	0.729603	0.99492
ENSG00000075407 (ZNF37A)	ENSG00000075407	ZNF37A	zinc finger protein 37A	-0.0888761	5.73631	0.424037	0.989281
ENSG00000075413 (MARK3)	ENSG00000075413	MARK3	microtubule affinity regulating kinase 3	0.000432909	6.54325	0.996387	0.998983
ENSG00000075415 (SLC25A3)	ENSG00000075415	SLC25A3	solute carrier family 25 member 3	-0.0706701	8.07127	0.525167	0.99492
ENSG00000075420 (FNDC3B)	ENSG00000075420	FNDC3B	fibronectin type III domain containing 3B	0.175124	7.349	0.120039	0.90314
ENSG00000075426 (FOSL2)	ENSG00000075426	FOSL2	FOS like 2, AP-1 transcription factor subunit	0.325721	7.83111	0.197586	0.935897
ENSG00000075429 (CACNG5)	ENSG00000075429	CACNG5	calcium voltage-gated channel auxiliary subunit gamma 5	-0.943354	0.420426	0.0553036	0.830136
ENSG00000075539 (FRYL)	ENSG00000075539	FRYL	FRY like transcription coactivator	0.0936062	6.84699	0.407259	0.988907
ENSG00000075568 (TMEM131)	ENSG00000075568	TMEM131	transmembrane protein 131	0.028251	6.45429	0.781266	0.997994
ENSG00000075618 (FSCN1)	ENSG00000075618	FSCN1	fascin actin-bundling protein 1	-0.212054	4.39615	0.505833	0.99492
ENSG00000075624 (ACTB)	ENSG00000075624	ACTB	actin beta	0.13228	10.7391	0.495987	0.994432
ENSG00000075643 (MOCOS)	ENSG00000075643	MOCOS	molybdenum cofactor sulfurase	-0.110242	3.17598	0.633333	0.99492
ENSG00000075651 (PLD1)	ENSG00000075651	PLD1	phospholipase D1	0.115234	5.29055	0.49222	0.994432
ENSG00000075673 (ATP12A)	ENSG00000075673	ATP12A	ATPase H+/K+ transporting non-gastric alpha2 subunit	1.01031	3.03079	0.087517	0.86509
ENSG00000075702 (WDR62)	ENSG00000075702	WDR62	WD repeat domain 62	0.175415	1.49805	0.605671	0.99492
ENSG00000075711 (DLG1)	ENSG00000075711	DLG1	discs large MAGUK scaffold protein 1	0.0164082	6.7037	0.8721	0.998725
ENSG00000075785 (RAB7A)	ENSG00000075785	RAB7A	RAB7A, member RAS oncogene family	0.122772	7.22291	0.174934	0.926446
ENSG00000075790 (BCAP29)	ENSG00000075790	BCAP29	B cell receptor associated protein 29	0.301498	4.16825	0.150596	0.919337
ENSG00000075826 (SEC31B)	ENSG00000075826	SEC31B	SEC31 homolog B, COPII coat complex component	-0.0854053	4.48777	0.584578	0.99492
ENSG00000075856 (SART3)	ENSG00000075856	SART3	spliceosome associated factor 3, U4/U6 recycling protein	0.141345	5.44244	0.120737	0.90314
ENSG00000075884 (ARHGAP15)	ENSG00000075884	ARHGAP15	Rho GTPase activating protein 15	-0.187264	2.48759	0.605106	0.99492
ENSG00000075891 (PAX2)	ENSG00000075891	PAX2	paired box 2	-0.0302523	7.20045	0.827072	0.998725
ENSG00000075914 (EXOSC7)	ENSG00000075914	EXOSC7	exosome component 7	0.0170641	4.51894	0.905431	0.998725
ENSG00000075945 (KIFAP3)	ENSG00000075945	KIFAP3	kinesin associated protein 3	0.0265326	5.09814	0.820004	0.998725
ENSG00000075975 (MKRN2)	ENSG00000075975	MKRN2	makorin ring finger protein 2	0.068581	4.27419	0.517665	0.99492
ENSG00000076003 (MCM6)	ENSG00000076003	MCM6	minichromosome maintenance complex component 6	0.417952	3.77856	0.00486276	0.412439
ENSG00000076043 (REXO2)	ENSG00000076043	REXO2	RNA exonuclease 2	-0.0784608	4.9203	0.487185	0.993727
ENSG00000076053 (RBM7)	ENSG00000076053	RBM7	RNA binding motif protein 7	0.0848469	4.144	0.58969	0.99492
ENSG00000076067 (RBMS2)	ENSG00000076067	RBMS2	RNA binding motif single stranded interacting protein 2	0.00789707	6.69655	0.936679	0.998939
ENSG00000076108 (BAZ2A)	ENSG00000076108	BAZ2A	bromodomain adjacent to zinc finger domain 2A	0.0201035	7.51407	0.840156	0.998725
ENSG00000076201 (PTPN23)	ENSG00000076201	PTPN23	protein tyrosine phosphatase non-receptor type 23	0.0483803	6.30787	0.694454	0.99492
ENSG00000076242 (MLH1)	ENSG00000076242	MLH1	mutL homolog 1	-0.00494976	4.75775	0.959012	0.998939
ENSG00000076248 (UNG)	ENSG00000076248	UNG	uracil DNA glycosylase	-0.112403	4.549	0.322617	0.977256
ENSG00000076258 (FMO4)	ENSG00000076258	FMO4	flavin containing dimethylaniline monoxygenase 4	-0.141349	4.21736	0.578363	0.99492
ENSG00000076321 (KLHL20)	ENSG00000076321	KLHL20	kelch like family member 20	0.131415	4.3178	0.23368	0.953245
ENSG00000076344 (RGS11)	ENSG00000076344	RGS11	regulator of G protein signaling 11	0.263849	1.76602	0.42253	0.989281
ENSG00000076351 (SLC46A1)	ENSG00000076351	SLC46A1	solute carrier family 46 member 1	-0.389539	5.0175	0.0314326	0.742166
ENSG00000076356 (PLXNA2)	ENSG00000076356	PLXNA2	plexin A2	0.210157	5.78492	0.192413	0.932137
ENSG00000076382 (SPAG5)	ENSG00000076382	SPAG5	sperm associated antigen 5	-0.179595	6.7347	0.638947	0.99492
ENSG00000076513 (ANKRD13A)	ENSG00000076513	ANKRD13A	ankyrin repeat domain 13A	0.0779911	5.87671	0.382598	0.98715
ENSG00000076554 (TPD52)	ENSG00000076554	TPD52	tumor protein D52	0.022167	5.55373	0.890632	0.998725
ENSG00000076555 (ACACB)	ENSG00000076555	ACACB	acetyl-CoA carboxylase beta	0.00841053	7.46715	0.963867	0.998939
ENSG00000076604 (TRAF4)	ENSG00000076604	TRAF4	TNF receptor associated factor 4	0.174808	5.48845	0.0822383	0.864726
ENSG00000076641 (PAG1)	ENSG00000076641	PAG1	phosphoprotein membrane anchor with glycosphingolipid microdomains 1	0.136038	4.692	0.418578	0.988956
ENSG00000076650 (GPATCH1)	ENSG00000076650	GPATCH1	G-patch domain containing 1	0.0572107	3.76507	0.593114	0.99492
ENSG00000076662 (ICAM3)	ENSG00000076662	ICAM3	intercellular adhesion molecule 3	0.119521	2.519	0.579072	0.99492
ENSG00000076685 (NT5C2)	ENSG00000076685	NT5C2	5'-nucleotidase, cytosolic II	0.045192	6.14313	0.72674	0.99492
ENSG00000076706 (MCAM)	ENSG00000076706	MCAM	melanoma cell adhesion molecule	-0.12176	5.6546	0.646797	0.99492
ENSG00000076716 (GPC4)	ENSG00000076716	GPC4	glypican 4	0.353215	6.38138	0.0313875	0.741912
ENSG00000076770 (MBNL3)	ENSG00000076770	MBNL3	muscleblind like splicing regulator 3	-0.130965	5.28642	0.447744	0.989281
ENSG00000076826 (CAMSAP3)	ENSG00000076826	CAMSAP3	calmodulin regulated spectrin associated protein family member 3	-0.0538428	5.68928	0.626724	0.99492
ENSG00000076864 (RAP1GAP)	ENSG00000076864	RAP1GAP	RAP1 GTPase activating protein	0.0162679	7.24133	0.939752	0.998939
ENSG00000076924 (XAB2)	ENSG00000076924	XAB2	XPA binding protein 2	0.0362728	5.30348	0.684525	0.99492
ENSG00000076928 (ARHGEF1)	ENSG00000076928	ARHGEF1	Rho guanine nucleotide exchange factor 1	0.179395	6.24037	0.316151	0.975469
ENSG00000076944 (STXBP2)	ENSG00000076944	STXBP2	syntaxin binding protein 2	0.178541	5.89074	0.089526	0.872816
ENSG00000076984 (MAP2K7)	ENSG00000076984	MAP2K7	mitogen-activated protein kinase kinase 7	-0.0579439	5.41	0.54915	0.99492
ENSG00000077044 (DGKD)	ENSG00000077044	DGKD	diacylglycerol kinase delta	0.150558	4.85191	0.32613	0.978328
ENSG00000077063 (CTTNBP2)	ENSG00000077063	CTTNBP2	cortactin binding protein 2	0.54126	5.18542	0.0479623	0.810879
ENSG00000077092 (RARB)	ENSG00000077092	RARB	retinoic acid receptor beta	-0.0814567	4.16089	0.724863	0.99492
ENSG00000077097 (TOP2B)	ENSG00000077097	TOP2B	DNA topoisomerase II beta	0.0106309	6.98802	0.921639	0.998939
ENSG00000077147 (TM9SF3)	ENSG00000077147	TM9SF3	transmembrane 9 superfamily member 3	0.00536151	7.28562	0.97279	0.998939
ENSG00000077150 (NFKB2)	ENSG00000077150	NFKB2	nuclear factor kappa B subunit 2	0.153611	5.15064	0.594521	0.99492
ENSG00000077152 (UBE2T)	ENSG00000077152	UBE2T	ubiquitin conjugating enzyme E2 T	0.47005	-0.192357	0.0968382	0.880031
ENSG00000077157 (PPP1R12B)	ENSG00000077157	PPP1R12B	protein phosphatase 1 regulatory subunit 12B	-0.084252	6.88454	0.581477	0.99492
ENSG00000077232 (DNAJC10)	ENSG00000077232	DNAJC10	DnaJ heat shock protein family (Hsp40) member C10	0.142492	6.40663	0.273907	0.967125
ENSG00000077235 (GTF3C1)	ENSG00000077235	GTF3C1	general transcription factor IIIC subunit 1	0.169524	7.10792	0.189918	0.931373
ENSG00000077238 (IL4R)	ENSG00000077238	IL4R	interleukin 4 receptor	0.461729	5.77661	0.0247798	0.694161
ENSG00000077254 (USP33)	ENSG00000077254	USP33	ubiquitin specific peptidase 33	0.0395143	6.10585	0.745431	0.995009
ENSG00000077264 (PAK3)	ENSG00000077264	PAK3	p21 (RAC1) activated kinase 3	0.0645018	1.64377	0.832131	0.998725
ENSG00000077274 (CAPN6)	ENSG00000077274	CAPN6	calpain 6	-0.810535	2.12478	0.1567	0.924145
ENSG00000077312 (SNRPA)	ENSG00000077312	SNRPA	small nuclear ribonucleoprotein polypeptide A	0.136765	4.20544	0.378186	0.98683
ENSG00000077327 (SPAG6)	ENSG00000077327	SPAG6	sperm associated antigen 6	0.200255	-0.252739	0.720832	0.99492
ENSG00000077348 (EXOSC5)	ENSG00000077348	EXOSC5	exosome component 5	0.0648393	1.85206	0.74189	0.995009
ENSG00000077380 (DYNC1I2)	ENSG00000077380	DYNC1I2	dynein cytoplasmic 1 intermediate chain 2	0.0709161	6.33284	0.437558	0.989281
ENSG00000077420 (APBB1IP)	ENSG00000077420	APBB1IP	amyloid beta precursor protein binding family B member 1 interacting protein	-0.133863	3.53535	0.716322	0.99492
ENSG00000077454 (LRCH4)	ENSG00000077454	LRCH4	leucine rich repeats and calponin homology domain containing 4	0.200935	5.62752	0.146158	0.914707
ENSG00000077458 (FAM76B)	ENSG00000077458	FAM76B	family with sequence similarity 76 member B	0.191246	3.36654	0.275525	0.967339
ENSG00000077463 (SIRT6)	ENSG00000077463	SIRT6	sirtuin 6	0.05867	3.53188	0.70661	0.99492
ENSG00000077514 (POLD3)	ENSG00000077514	POLD3	DNA polymerase delta 3, accessory subunit	-0.188766	4.56395	0.372804	0.984803
ENSG00000077522 (ACTN2)	ENSG00000077522	ACTN2	actinin alpha 2	-0.371399	-0.531546	0.339701	0.980657
ENSG00000077549 (CAPZB)	ENSG00000077549	CAPZB	capping actin protein of muscle Z-line subunit beta	0.0937157	7.20764	0.291558	0.971453
ENSG00000077585 (GPR137B)	ENSG00000077585	GPR137B	G protein-coupled receptor 137B	-0.0904752	5.3271	0.645362	0.99492
ENSG00000077616 (NAALAD2)	ENSG00000077616	NAALAD2	N-acetylated alpha-linked acidic dipeptidase 2	-0.690392	1.7277	0.0804306	0.863302
ENSG00000077684 (JADE1)	ENSG00000077684	JADE1	jade family PHD finger 1	0.272261	6.93891	0.157429	0.924482
ENSG00000077713 (SLC25A43)	ENSG00000077713	SLC25A43	solute carrier family 25 member 43	0.193882	3.75966	0.216424	0.945496
ENSG00000077721 (UBE2A)	ENSG00000077721	UBE2A	ubiquitin conjugating enzyme E2 A	0.210719	4.64643	0.0895682	0.872816
ENSG00000077782 (FGFR1)	ENSG00000077782	FGFR1	fibroblast growth factor receptor 1	0.213681	6.46331	0.226191	0.949023
ENSG00000077942 (FBLN1)	ENSG00000077942	FBLN1	fibulin 1	-0.727115	6.00188	0.0431227	0.800811
ENSG00000077943 (ITGA8)	ENSG00000077943	ITGA8	integrin subunit alpha 8	-0.46848	5.60305	0.0122836	0.570105
ENSG00000078018 (MAP2)	ENSG00000078018	MAP2	microtubule associated protein 2	0.146774	3.65844	0.518699	0.99492
ENSG00000078043 (PIAS2)	ENSG00000078043	PIAS2	protein inhibitor of activated STAT 2	0.0109896	5.93509	0.932156	0.998939
ENSG00000078053 (AMPH)	ENSG00000078053	AMPH	amphiphysin	-0.312374	1.36824	0.26614	0.960515
ENSG00000078061 (ARAF)	ENSG00000078061	ARAF	A-Raf proto-oncogene, serine/threonine kinase	0.0412751	5.86769	0.656393	0.99492
ENSG00000078070 (MCCC1)	ENSG00000078070	MCCC1	methylcrotonoyl-CoA carboxylase 1	-0.147473	5.7008	0.277978	0.968192
ENSG00000078081 (LAMP3)	ENSG00000078081	LAMP3	lysosomal associated membrane protein 3	-0.24202	0.271478	0.58419	0.99492
ENSG00000078098 (FAP)	ENSG00000078098	FAP	fibroblast activation protein alpha	0.87289	0.192659	0.194383	0.933212
ENSG00000078114 (NEBL)	ENSG00000078114	NEBL	nebulette	-0.10961	6.20392	0.515144	0.99492
ENSG00000078124 (ACER3)	ENSG00000078124	ACER3	alkaline ceramidase 3	0.209251	4.87143	0.180008	0.927005
ENSG00000078140 (UBE2K)	ENSG00000078140	UBE2K	ubiquitin conjugating enzyme E2 K	0.0757792	5.85224	0.650939	0.99492
ENSG00000078142 (PIK3C3)	ENSG00000078142	PIK3C3	phosphatidylinositol 3-kinase catalytic subunit type 3	0.119469	5.9552	0.284172	0.970902
ENSG00000078177 (N4BP2)	ENSG00000078177	N4BP2	NEDD4 binding protein 2	-0.0774491	4.5342	0.537528	0.99492
ENSG00000078237 (TIGAR)	ENSG00000078237	TIGAR	TP53 induced glycolysis regulatory phosphatase	0.0989969	3.85936	0.604166	0.99492
ENSG00000078246 (TULP3)	ENSG00000078246	TULP3	TUB like protein 3	0.105422	5.18709	0.488227	0.993887
ENSG00000078269 (SYNJ2)	ENSG00000078269	SYNJ2	synaptojanin 2	0.197375	4.66605	0.318239	0.976538
ENSG00000078295 (ADCY2)	ENSG00000078295	ADCY2	adenylate cyclase 2	0.0517915	1.71387	0.879908	0.998725
ENSG00000078304 (PPP2R5C)	ENSG00000078304	PPP2R5C	protein phosphatase 2 regulatory subunit B'gamma	-0.0450209	6.3184	0.63195	0.99492
ENSG00000078319 (PMS2P1)	ENSG00000078319	PMS2P1	PMS1 homolog 2, mismatch repair system component pseudogene 1	0.00883843	2.72279	0.958391	0.998939
ENSG00000078328 (RBFOX1)	ENSG00000078328	RBFOX1	RNA binding fox-1 homolog 1	-0.0887035	1.04004	0.817698	0.998725
ENSG00000078369 (GNB1)	ENSG00000078369	GNB1	G protein subunit beta 1	0.0709031	7.79294	0.473463	0.989281
ENSG00000078399 (HOXA9)	ENSG00000078399	HOXA9	homeobox A9	0.0801437	4.65894	0.627954	0.99492
ENSG00000078401 (EDN1)	ENSG00000078401	EDN1	endothelin 1	0.335194	2.71672	0.261142	0.957807
ENSG00000078403 (MLLT10)	ENSG00000078403	MLLT10	MLLT10 histone lysine methyltransferase DOT1L cofactor	-0.0147813	5.71241	0.899235	0.998725
ENSG00000078487 (ZCWPW1)	ENSG00000078487	ZCWPW1	zinc finger CW-type and PWWP domain containing 1	-0.115519	1.81649	0.642242	0.99492
ENSG00000078589 (P2RY10)	ENSG00000078589	P2RY10	P2Y receptor family member 10	-0.0499534	1.00871	0.907257	0.998725
ENSG00000078596 (ITM2A)	ENSG00000078596	ITM2A	integral membrane protein 2A	-0.329494	2.48111	0.205233	0.942816
ENSG00000078618 (NRDC)	ENSG00000078618	NRDC	nardilysin convertase	0.198954	6.63574	0.0408656	0.791286
ENSG00000078668 (VDAC3)	ENSG00000078668	VDAC3	voltage dependent anion channel 3	0.0170599	5.47428	0.868882	0.998725
ENSG00000078674 (PCM1)	ENSG00000078674	PCM1	pericentriolar material 1	-0.01357	7.42276	0.908068	0.998725
ENSG00000078687 (TNRC6C)	ENSG00000078687	TNRC6C	trinucleotide repeat containing adaptor 6C	-0.175045	5.73207	0.166804	0.926446
ENSG00000078699 (CBFA2T2)	ENSG00000078699	CBFA2T2	CBFA2/RUNX1 partner transcriptional co-repressor 2	-0.0843709	5.69589	0.428278	0.989281
ENSG00000078725 (BRINP1)	ENSG00000078725	BRINP1	BMP/retinoic acid inducible neural specific 1	0.872265	0.400434	0.0673128	0.850987
ENSG00000078747 (ITCH)	ENSG00000078747	ITCH	itchy E3 ubiquitin protein ligase	0.0254871	6.59179	0.817779	0.998725
ENSG00000078795 (PKD2L2)	ENSG00000078795	PKD2L2	polycystin 2 like 2, transient receptor potential cation channel	0.160319	0.301825	0.517847	0.99492
ENSG00000078804 (TP53INP2)	ENSG00000078804	TP53INP2	tumor protein p53 inducible nuclear protein 2	0.114758	6.33067	0.571068	0.99492
ENSG00000078808 (SDF4)	ENSG00000078808	SDF4	stromal cell derived factor 4	0.0113056	6.85894	0.912834	0.998725
ENSG00000078814 (MYH7B)	ENSG00000078814	MYH7B	myosin heavy chain 7B	-0.313447	1.83447	0.191032	0.931527
ENSG00000078902 (TOLLIP)	ENSG00000078902	TOLLIP	toll interacting protein	-0.0984788	6.54321	0.355078	0.983713
ENSG00000078967 (UBE2D4)	ENSG00000078967	UBE2D4	ubiquitin conjugating enzyme E2 D4 (putative)	-0.00117854	4.40088	0.992538	0.998939
ENSG00000079101 (CLUL1)	ENSG00000079101	CLUL1	clusterin like 1	-0.656493	0.616019	0.0580845	0.83195
ENSG00000079102 (RUNX1T1)	ENSG00000079102	RUNX1T1	RUNX1 partner transcriptional co-repressor 1	-0.270879	3.94485	0.251943	0.955813
ENSG00000079134 (THOC1)	ENSG00000079134	THOC1	THO complex 1	0.069808	4.54426	0.566878	0.99492
ENSG00000079150 (FKBP7)	ENSG00000079150	FKBP7	FKBP prolyl isomerase 7	-0.345856	1.82034	0.0654925	0.845644
ENSG00000079156 (OSBPL6)	ENSG00000079156	OSBPL6	oxysterol binding protein like 6	0.0809093	2.98685	0.741006	0.995009
ENSG00000079215 (SLC1A3)	ENSG00000079215	SLC1A3	solute carrier family 1 member 3	0.0050854	3.61225	0.991262	0.998939
ENSG00000079246 (XRCC5)	ENSG00000079246	XRCC5	X-ray repair cross complementing 5	0.200068	7.4083	0.0385698	0.783258
ENSG00000079257 (LXN)	ENSG00000079257	LXN	latexin	0.0283337	2.55569	0.914474	0.998725
ENSG00000079263 (SP140)	ENSG00000079263	SP140	SP140 nuclear body protein	0.494721	0.994069	0.379623	0.98683
ENSG00000079277 (MKNK1)	ENSG00000079277	MKNK1	MAPK interacting serine/threonine kinase 1	0.194421	5.00061	0.124527	0.90314
ENSG00000079308 (TNS1)	ENSG00000079308	TNS1	tensin 1	0.00286951	10.2716	0.984504	0.998939
ENSG00000079313 (REXO1)	ENSG00000079313	REXO1	RNA exonuclease 1 homolog	0.17173	5.75344	0.134817	0.905272
ENSG00000079332 (SAR1A)	ENSG00000079332	SAR1A	secretion associated Ras related GTPase 1A	0.0785755	6.49493	0.445157	0.989281
ENSG00000079335 (CDC14A)	ENSG00000079335	CDC14A	cell division cycle 14A	0.0718455	4.33275	0.659652	0.99492
ENSG00000079337 (RAPGEF3)	ENSG00000079337	RAPGEF3	Rap guanine nucleotide exchange factor 3	-0.142482	7.86729	0.57676	0.99492
ENSG00000079385 (CEACAM1)	ENSG00000079385	CEACAM1	CEA cell adhesion molecule 1	0.199771	5.97183	0.296826	0.971453
ENSG00000079387 (SENP1)	ENSG00000079387	SENP1	SUMO specific peptidase 1	0.175996	3.87272	0.120439	0.90314
ENSG00000079432 (CIC)	ENSG00000079432	CIC	capicua transcriptional repressor	0.0358643	6.8949	0.79496	0.998396
ENSG00000079435 (LIPE)	ENSG00000079435	LIPE	lipase E, hormone sensitive type	-0.0090278	2.20001	0.961879	0.998939
ENSG00000079459 (FDFT1)	ENSG00000079459	FDFT1	farnesyl-diphosphate farnesyltransferase 1	-0.159846	4.66341	0.369953	0.984803
ENSG00000079462 (PAFAH1B3)	ENSG00000079462	PAFAH1B3	platelet activating factor acetylhydrolase 1b catalytic subunit 3	0.129569	2.63817	0.572	0.99492
ENSG00000079482 (OPHN1)	ENSG00000079482	OPHN1	oligophrenin 1	-0.0605011	5.54967	0.646529	0.99492
ENSG00000079557 (AFM)	ENSG00000079557	AFM	afamin	-1.12546	4.90978	0.0340388	0.758344
ENSG00000079616 (KIF22)	ENSG00000079616	KIF22	kinesin family member 22	-0.0124311	4.00915	0.936088	0.998939
ENSG00000079689 (SCGN)	ENSG00000079689	SCGN	secretagogin, EF-hand calcium binding protein	0.682041	0.204953	0.127416	0.90314
ENSG00000079691 (CARMIL1)	ENSG00000079691	CARMIL1	capping protein regulator and myosin 1 linker 1	0.0177093	5.97215	0.884202	0.998725
ENSG00000079739 (PGM1)	ENSG00000079739	PGM1	phosphoglucomutase 1	-0.0173021	5.68566	0.909843	0.998725
ENSG00000079785 (DDX1)	ENSG00000079785	DDX1	DEAD-box helicase 1	0.131433	6.22711	0.166657	0.926446
ENSG00000079805 (DNM2)	ENSG00000079805	DNM2	dynamin 2	0.2634	7.79461	0.0108458	0.540888
ENSG00000079819 (EPB41L2)	ENSG00000079819	EPB41L2	erythrocyte membrane protein band 4.1 like 2	-0.125158	6.37459	0.444297	0.989281
ENSG00000079931 (MOXD1)	ENSG00000079931	MOXD1	monooxygenase DBH like 1	-0.667809	4.84309	0.131794	0.903594
ENSG00000079950 (STX7)	ENSG00000079950	STX7	syntaxin 7	-0.0293387	6.50249	0.85395	0.998725
ENSG00000079974 (RABL2B)	ENSG00000079974	RABL2B	RAB, member of RAS oncogene family like 2B	-0.139526	4.91909	0.258153	0.957807
ENSG00000079999 (KEAP1)	ENSG00000079999	KEAP1	kelch like ECH associated protein 1	0.0152616	5.4427	0.868799	0.998725
ENSG00000080007 (DDX43)	ENSG00000080007	DDX43	DEAD-box helicase 43	0.289446	-0.194593	0.676724	0.99492
ENSG00000080031 (PTPRH)	ENSG00000080031	PTPRH	protein tyrosine phosphatase receptor type H	-0.682467	-1.21301	0.164991	0.926446
ENSG00000080166 (DCT)	ENSG00000080166	DCT	dopachrome tautomerase	-1.36373	-0.627055	0.0117644	0.560441
ENSG00000080189 (SLC35C2)	ENSG00000080189	SLC35C2	solute carrier family 35 member C2	0.0675491	5.03634	0.504546	0.99492
ENSG00000080200 (CRYBG3)	ENSG00000080200	CRYBG3	crystallin beta-gamma domain containing 3	-0.00214685	6.30679	0.986717	0.998939
ENSG00000080224 (EPHA6)	ENSG00000080224	EPHA6	EPH receptor A6	0.90932	0.0685123	0.0820034	0.864726
ENSG00000080293 (SCTR)	ENSG00000080293	SCTR	secretin receptor	-0.0540799	1.51939	0.852896	0.998725
ENSG00000080298 (RFX3)	ENSG00000080298	RFX3	regulatory factor X3	-0.0714076	4.44318	0.69838	0.99492
ENSG00000080345 (RIF1)	ENSG00000080345	RIF1	replication timing regulatory factor 1	0.0610069	6.65528	0.668012	0.99492
ENSG00000080371 (RAB21)	ENSG00000080371	RAB21	RAB21, member RAS oncogene family	-0.0288996	6.66865	0.871144	0.998725
ENSG00000080493 (SLC4A4)	ENSG00000080493	SLC4A4	solute carrier family 4 member 4	-0.0157435	9.43899	0.964993	0.998939
ENSG00000080503 (SMARCA2)	ENSG00000080503	SMARCA2	SWI/SNF related, matrix associated, actin dependent regulator of chromatin, subfamily a, member 2	-0.217631	7.38966	0.0342923	0.758344
ENSG00000080546 (SESN1)	ENSG00000080546	SESN1	sestrin 1	-0.303903	4.52196	0.0458551	0.804272
ENSG00000080561 (MID2)	ENSG00000080561	MID2	midline 2	-0.0800077	3.55365	0.492411	0.994432
ENSG00000080573 (COL5A3)	ENSG00000080573	COL5A3	collagen type V alpha 3 chain	0.152602	3.75439	0.701414	0.99492
ENSG00000080603 (SRCAP)	ENSG00000080603	SRCAP	Snf2 related CREBBP activator protein	0.071591	7.54057	0.517741	0.99492
ENSG00000080608 (PUM3)	ENSG00000080608	PUM3	pumilio RNA binding family member 3	0.318792	5.55197	0.137896	0.906621
ENSG00000080709 (KCNN2)	ENSG00000080709	KCNN2	potassium calcium-activated channel subfamily N member 2	0.235451	-0.0108497	0.432062	0.989281
ENSG00000080802 (CNOT4)	ENSG00000080802	CNOT4	CCR4-NOT transcription complex subunit 4	-0.056122	5.28019	0.595776	0.99492
ENSG00000080815 (PSEN1)	ENSG00000080815	PSEN1	presenilin 1	0.119305	6.1624	0.254388	0.955813
ENSG00000080819 (CPOX)	ENSG00000080819	CPOX	coproporphyrinogen oxidase	-0.0607737	3.03235	0.739115	0.995009
ENSG00000080822 (CLDND1)	ENSG00000080822	CLDND1	claudin domain containing 1	0.144077	4.88614	0.351929	0.983375
ENSG00000080823 (MOK)	ENSG00000080823	MOK	MOK protein kinase	0.0511706	4.53213	0.692683	0.99492
ENSG00000080824 (HSP90AA1)	ENSG00000080824	HSP90AA1	heat shock protein 90 alpha family class A member 1	-0.0922237	9.17193	0.719901	0.99492
ENSG00000080839 (RBL1)	ENSG00000080839	RBL1	RB transcriptional corepressor like 1	-0.224834	3.11984	0.219626	0.947537
ENSG00000080845 (DLGAP4)	ENSG00000080845	DLGAP4	DLG associated protein 4	0.0304823	6.23508	0.785775	0.998396
ENSG00000080854 (IGSF9B)	ENSG00000080854	IGSF9B	immunoglobulin superfamily member 9B	-0.084051	4.04573	0.752828	0.995009
ENSG00000080910 (CFHR2)	ENSG00000080910	CFHR2	complement factor H related 2	-0.132981	-0.494733	0.670527	0.99492
ENSG00000080947 (CROCCP3)	ENSG00000080947	CROCCP3	CROCC pseudogene 3	-0.129962	4.29382	0.494442	0.994432
ENSG00000080986 (NDC80)	ENSG00000080986	NDC80	NDC80 kinetochore complex component	-0.542776	0.305487	0.216379	0.945496
ENSG00000081014 (AP4E1)	ENSG00000081014	AP4E1	adaptor related protein complex 4 subunit epsilon 1	-0.00139125	4.37274	0.991119	0.998939
ENSG00000081019 (RSBN1)	ENSG00000081019	RSBN1	round spermatid basic protein 1	-0.137464	4.65333	0.418961	0.989281
ENSG00000081026 (MAGI3)	ENSG00000081026	MAGI3	membrane associated guanylate kinase, WW and PDZ domain containing 3	-0.0434527	5.74325	0.700384	0.99492
ENSG00000081041 (CXCL2)	ENSG00000081041	CXCL2	C-X-C motif chemokine ligand 2	0.162813	1.53248	0.735189	0.994988
ENSG00000081052 (COL4A4)	ENSG00000081052	COL4A4	collagen type IV alpha 4 chain	0.0586956	7.70933	0.596191	0.99492
ENSG00000081059 (TCF7)	ENSG00000081059	TCF7	transcription factor 7	0.285255	2.54712	0.432965	0.989281
ENSG00000081087 (OSTM1)	ENSG00000081087	OSTM1	osteoclastogenesis associated transmembrane protein 1	0.239981	4.64509	0.134328	0.905272
ENSG00000081148 (IMPG2)	ENSG00000081148	IMPG2	interphotoreceptor matrix proteoglycan 2	-0.407866	0.658399	0.175258	0.926446
ENSG00000081154 (PCNP)	ENSG00000081154	PCNP	PEST proteolytic signal containing nuclear protein	-0.00500836	5.50512	0.97321	0.998939
ENSG00000081177 (EXD2)	ENSG00000081177	EXD2	exonuclease 3'-5' domain containing 2	-0.0234528	4.7458	0.834355	0.998725
ENSG00000081181 (ARG2)	ENSG00000081181	ARG2	arginase 2	0.0321209	5.22134	0.908629	0.998725
ENSG00000081189 (MEF2C)	ENSG00000081189	MEF2C	myocyte enhancer factor 2C	-0.215959	5.06498	0.222664	0.948398
ENSG00000081237 (PTPRC)	ENSG00000081237	PTPRC	protein tyrosine phosphatase receptor type C	0.0169698	4.63694	0.962417	0.998939
ENSG00000081248 (CACNA1S)	ENSG00000081248	CACNA1S	calcium voltage-gated channel subunit alpha1 S	-2.24909	0.013322	0.000115363	0.075608
ENSG00000081277 (PKP1)	ENSG00000081277	PKP1	plakophilin 1	-0.695618	0.0771211	0.126214	0.90314
ENSG00000081307 (UBA5)	ENSG00000081307	UBA5	ubiquitin like modifier activating enzyme 5	-0.0287523	5.43485	0.807668	0.998396
ENSG00000081320 (STK17B)	ENSG00000081320	STK17B	serine/threonine kinase 17b	0.117189	4.6727	0.656702	0.99492
ENSG00000081377 (CDC14B)	ENSG00000081377	CDC14B	cell division cycle 14B	-0.173452	5.55289	0.123553	0.90314
ENSG00000081386 (ZNF510)	ENSG00000081386	ZNF510	zinc finger protein 510	-0.0302642	4.23879	0.8053	0.998396
ENSG00000081479 (LRP2)	ENSG00000081479	LRP2	LDL receptor related protein 2	-0.13955	11.1915	0.549387	0.99492
ENSG00000081665 (ZNF506)	ENSG00000081665	ZNF506	zinc finger protein 506	0.0267976	5.56345	0.804366	0.998396
ENSG00000081692 (JMJD4)	ENSG00000081692	JMJD4	jumonji domain containing 4	0.0520771	3.68635	0.698493	0.99492
ENSG00000081721 (DUSP12)	ENSG00000081721	DUSP12	dual specificity phosphatase 12	0.171892	2.75339	0.248434	0.954713
ENSG00000081760 (AACS)	ENSG00000081760	AACS	acetoacetyl-CoA synthetase	-0.106685	5.2129	0.533822	0.99492
ENSG00000081791 (DELE1)	ENSG00000081791	DELE1	DAP3 binding cell death enhancer 1	0.12646	6.00376	0.297424	0.971768
ENSG00000081800 (SLC13A1)	ENSG00000081800	SLC13A1	solute carrier family 13 member 1	-0.458171	6.33444	0.170095	0.926446
ENSG00000081803 (CADPS2)	ENSG00000081803	CADPS2	calcium dependent secretion activator 2	0.0643673	6.20675	0.682578	0.99492
ENSG00000081818 (PCDHB4)	ENSG00000081818	PCDHB4	protocadherin beta 4	-0.0755394	1.83313	0.746612	0.995009
ENSG00000081842 (PCDHA6)	ENSG00000081842	PCDHA6	protocadherin alpha 6	0.223616	1.76748	0.527056	0.99492
ENSG00000081853 (PCDHGA2)	ENSG00000081853	PCDHGA2	protocadherin gamma subfamily A, 2	0.107352	2.38774	0.62289	0.99492
ENSG00000081870 (HSPB11)	ENSG00000081870	HSPB11	heat shock protein family B (small) member 11	0.197982	3.17524	0.240322	0.953502
ENSG00000081913 (PHLPP1)	ENSG00000081913	PHLPP1	PH domain and leucine rich repeat protein phosphatase 1	-0.0554383	4.68324	0.617885	0.99492
ENSG00000081923 (ATP8B1)	ENSG00000081923	ATP8B1	ATPase phospholipid transporting 8B1	-0.200638	4.93467	0.301143	0.971865
ENSG00000081985 (IL12RB2)	ENSG00000081985	IL12RB2	interleukin 12 receptor subunit beta 2	-0.271672	1.3207	0.430888	0.989281
ENSG00000082014 (SMARCD3)	ENSG00000082014	SMARCD3	SWI/SNF related, matrix associated, actin dependent regulator of chromatin, subfamily d, member 3	0.0523176	4.38548	0.737555	0.994988
ENSG00000082068 (WDR70)	ENSG00000082068	WDR70	WD repeat domain 70	0.0442014	4.59199	0.676289	0.99492
ENSG00000082074 (FYB1)	ENSG00000082074	FYB1	FYN binding protein 1	-0.0246763	4.15545	0.937301	0.998939
ENSG00000082146 (STRADB)	ENSG00000082146	STRADB	STE20 related adaptor beta	-0.161731	5.27786	0.429213	0.989281
ENSG00000082153 (BZW1)	ENSG00000082153	BZW1	basic leucine zipper and W2 domains 1	0.231092	6.56888	0.163138	0.926446
ENSG00000082175 (PGR)	ENSG00000082175	PGR	progesterone receptor	-0.258843	3.6162	0.219044	0.947537
ENSG00000082196 (C1QTNF3)	ENSG00000082196	C1QTNF3	C1q and TNF related 3	0.103614	2.5189	0.716467	0.99492
ENSG00000082212 (ME2)	ENSG00000082212	ME2	malic enzyme 2	-0.0327714	5.00369	0.812317	0.998396
ENSG00000082213 (C5orf22)	ENSG00000082213	C5orf22	chromosome 5 open reading frame 22	0.10365	4.00213	0.497994	0.99492
ENSG00000082258 (CCNT2)	ENSG00000082258	CCNT2	cyclin T2	0.128524	5.42132	0.392227	0.98756
ENSG00000082269 (FAM135A)	ENSG00000082269	FAM135A	family with sequence similarity 135 member A	0.093433	5.51315	0.638466	0.99492
ENSG00000082293 (COL19A1)	ENSG00000082293	COL19A1	collagen type XIX alpha 1 chain	-0.564974	3.28003	0.0939681	0.875335
ENSG00000082397 (EPB41L3)	ENSG00000082397	EPB41L3	erythrocyte membrane protein band 4.1 like 3	-0.243501	6.77176	0.25013	0.955813
ENSG00000082438 (COBLL1)	ENSG00000082438	COBLL1	cordon-bleu WH2 repeat protein like 1	-0.150356	8.16305	0.353605	0.983713
ENSG00000082458 (DLG3)	ENSG00000082458	DLG3	discs large MAGUK scaffold protein 3	-0.23584	5.00378	0.191516	0.931527
ENSG00000082482 (KCNK2)	ENSG00000082482	KCNK2	potassium two pore domain channel subfamily K member 2	-0.760495	-1.71503	0.288874	0.971453
ENSG00000082512 (TRAF5)	ENSG00000082512	TRAF5	TNF receptor associated factor 5	0.0609925	4.24847	0.78119	0.997994
ENSG00000082515 (MRPL22)	ENSG00000082515	MRPL22	mitochondrial ribosomal protein L22	0.15395	3.52741	0.280603	0.968963
ENSG00000082516 (GEMIN5)	ENSG00000082516	GEMIN5	gem nuclear organelle associated protein 5	-0.0696281	4.40228	0.604407	0.99492
ENSG00000082641 (NFE2L1)	ENSG00000082641	NFE2L1	nuclear factor, erythroid 2 like 1	-0.337029	8.9793	0.0181656	0.637227
ENSG00000082684 (SEMA5B)	ENSG00000082684	SEMA5B	semaphorin 5B	-0.128749	2.96391	0.57857	0.99492
ENSG00000082701 (GSK3B)	ENSG00000082701	GSK3B	glycogen synthase kinase 3 beta	0.0667255	6.36315	0.493587	0.994432
ENSG00000082781 (ITGB5)	ENSG00000082781	ITGB5	integrin subunit beta 5	0.0746804	6.75826	0.596792	0.99492
ENSG00000082805 (ERC1)	ENSG00000082805	ERC1	ELKS/RAB6-interacting/CAST family member 1	0.05418	7.10891	0.572714	0.99492
ENSG00000082898 (XPO1)	ENSG00000082898	XPO1	exportin 1	-0.00534035	6.97085	0.972578	0.998939
ENSG00000082996 (RNF13)	ENSG00000082996	RNF13	ring finger protein 13	0.0865892	5.40159	0.552345	0.99492
ENSG00000083067 (TRPM3)	ENSG00000083067	TRPM3	transient receptor potential cation channel subfamily M member 3	-0.0464164	7.31989	0.78775	0.998396
ENSG00000083093 (PALB2)	ENSG00000083093	PALB2	partner and localizer of BRCA2	0.0493326	3.74134	0.690219	0.99492
ENSG00000083097 (DOP1A)	ENSG00000083097	DOP1A	DOP1 leucine zipper like protein A	-0.00643266	5.80116	0.955075	0.998939
ENSG00000083099 (LYRM2)	ENSG00000083099	LYRM2	LYR motif containing 2	-0.00889965	4.95199	0.937313	0.998939
ENSG00000083123 (BCKDHB)	ENSG00000083123	BCKDHB	branched chain keto acid dehydrogenase E1 subunit beta	-0.261048	4.95905	0.116822	0.899015
ENSG00000083168 (KAT6A)	ENSG00000083168	KAT6A	lysine acetyltransferase 6A	0.00789682	7.03044	0.939534	0.998939
ENSG00000083223 (TUT7)	ENSG00000083223	TUT7	terminal uridylyl transferase 7	0.146051	5.58523	0.183745	0.928847
ENSG00000083290 (ULK2)	ENSG00000083290	ULK2	unc-51 like autophagy activating kinase 2	-0.0630655	4.60133	0.639196	0.99492
ENSG00000083307 (GRHL2)	ENSG00000083307	GRHL2	grainyhead like transcription factor 2	-0.255469	4.04177	0.142778	0.912139
ENSG00000083312 (TNPO1)	ENSG00000083312	TNPO1	transportin 1	-0.00955436	6.76985	0.942479	0.998939
ENSG00000083444 (PLOD1)	ENSG00000083444	PLOD1	procollagen-lysine,2-oxoglutarate 5-dioxygenase 1	0.238427	6.62804	0.0896472	0.872816
ENSG00000083454 (P2RX5)	ENSG00000083454	P2RX5	purinergic receptor P2X 5	0.405562	1.14682	0.525251	0.99492
ENSG00000083457 (ITGAE)	ENSG00000083457	ITGAE	integrin subunit alpha E	0.0359181	2.22057	0.849187	0.998725
ENSG00000083520 (DIS3)	ENSG00000083520	DIS3	DIS3 homolog, exosome endoribonuclease and 3'-5' exoribonuclease	-0.0387928	5.44545	0.767302	0.996122
ENSG00000083535 (PIBF1)	ENSG00000083535	PIBF1	progesterone immunomodulatory binding factor 1	0.0695441	4.33767	0.534697	0.99492
ENSG00000083544 (TDRD3)	ENSG00000083544	TDRD3	tudor domain containing 3	-0.0635529	5.0494	0.644237	0.99492
ENSG00000083635 (NUFIP1)	ENSG00000083635	NUFIP1	nuclear FMR1 interacting protein 1	0.210855	2.61466	0.207829	0.943542
ENSG00000083642 (PDS5B)	ENSG00000083642	PDS5B	PDS5 cohesin associated factor B	0.0276492	5.7711	0.840904	0.998725
ENSG00000083720 (OXCT1)	ENSG00000083720	OXCT1	3-oxoacid CoA-transferase 1	-0.669902	5.3301	0.0543495	0.824146
ENSG00000083750 (RRAGB)	ENSG00000083750	RRAGB	Ras related GTP binding B	0.0402719	4.04292	0.682762	0.99492
ENSG00000083799 (CYLD)	ENSG00000083799	CYLD	CYLD lysine 63 deubiquitinase	-0.00249431	5.58086	0.981449	0.998939
ENSG00000083807 (SLC27A5)	ENSG00000083807	SLC27A5	solute carrier family 27 member 5	-0.0199631	2.81379	0.896333	0.998725
ENSG00000083812 (ZNF324)	ENSG00000083812	ZNF324	zinc finger protein 324	-0.0281372	4.04141	0.819797	0.998725
ENSG00000083814 (ZNF671)	ENSG00000083814	ZNF671	zinc finger protein 671	-0.0585203	3.23219	0.669388	0.99492
ENSG00000083817 (ZNF416)	ENSG00000083817	ZNF416	zinc finger protein 416	0.0609152	1.9898	0.761264	0.995009
ENSG00000083828 (ZNF586)	ENSG00000083828	ZNF586	zinc finger protein 586	0.113667	4.69706	0.418569	0.988956
ENSG00000083838 (ZNF446)	ENSG00000083838	ZNF446	zinc finger protein 446	0.0274942	3.39721	0.837286	0.998725
ENSG00000083844 (ZNF264)	ENSG00000083844	ZNF264	zinc finger protein 264	-0.0292984	6.13639	0.760379	0.995009
ENSG00000083845 (RPS5)	ENSG00000083845	RPS5	ribosomal protein S5	0.0604454	6.56065	0.643038	0.99492
ENSG00000083857 (FAT1)	ENSG00000083857	FAT1	FAT atypical cadherin 1	0.14136	9.313	0.212608	0.944485
ENSG00000083896 (YTHDC1)	ENSG00000083896	YTHDC1	YTH domain containing 1	0.00566083	6.16951	0.964552	0.998939
ENSG00000083937 (CHMP2B)	ENSG00000083937	CHMP2B	charged multivesicular body protein 2B	0.188674	4.27754	0.242774	0.953502
ENSG00000084070 (SMAP2)	ENSG00000084070	SMAP2	small ArfGAP2	0.00289768	5.1075	0.989182	0.998939
ENSG00000084072 (PPIE)	ENSG00000084072	PPIE	peptidylprolyl isomerase E	-0.0829262	4.64984	0.54676	0.99492
ENSG00000084073 (ZMPSTE24)	ENSG00000084073	ZMPSTE24	zinc metallopeptidase STE24	0.0694952	5.64447	0.652165	0.99492
ENSG00000084090 (STARD7)	ENSG00000084090	STARD7	StAR related lipid transfer domain containing 7	-0.019437	7.16061	0.876145	0.998725
ENSG00000084092 (NOA1)	ENSG00000084092	NOA1	nitric oxide associated 1	-0.00234553	3.82619	0.985806	0.998939
ENSG00000084093 (REST)	ENSG00000084093	REST	RE1 silencing transcription factor	-0.0604783	6.19655	0.612159	0.99492
ENSG00000084110 (HAL)	ENSG00000084110	HAL	histidine ammonia-lyase	0.801754	-0.2563	0.0955941	0.875335
ENSG00000084112 (SSH1)	ENSG00000084112	SSH1	slingshot protein phosphatase 1	0.113732	6.26109	0.397709	0.987767
ENSG00000084207 (GSTP1)	ENSG00000084207	GSTP1	glutathione S-transferase pi 1	0.456056	7.14988	0.00900929	0.508576
ENSG00000084234 (APLP2)	ENSG00000084234	APLP2	amyloid beta precursor like protein 2	-0.0813155	9.16029	0.376612	0.986205
ENSG00000084444 (FAM234B)	ENSG00000084444	FAM234B	family with sequence similarity 234 member B	0.0730655	4.3371	0.586722	0.99492
ENSG00000084453 (SLCO1A2)	ENSG00000084453	SLCO1A2	solute carrier organic anion transporter family member 1A2	-0.599802	0.140494	0.147043	0.915607
ENSG00000084463 (WBP11)	ENSG00000084463	WBP11	WW domain binding protein 11	0.16325	5.65806	0.0911048	0.873014
ENSG00000084623 (EIF3I)	ENSG00000084623	EIF3I	eukaryotic translation initiation factor 3 subunit I	0.0887262	5.81855	0.397833	0.987767
ENSG00000084636 (COL16A1)	ENSG00000084636	COL16A1	collagen type XVI alpha 1 chain	-0.0332075	5.7298	0.916409	0.998731
ENSG00000084652 (TXLNA)	ENSG00000084652	TXLNA	taxilin alpha	0.0907446	6.57565	0.402309	0.987767
ENSG00000084674 (APOB)	ENSG00000084674	APOB	apolipoprotein B	-0.368375	0.8182	0.382331	0.98715
ENSG00000084676 (NCOA1)	ENSG00000084676	NCOA1	nuclear receptor coactivator 1	-0.0670693	6.69216	0.526356	0.99492
ENSG00000084693 (AGBL5)	ENSG00000084693	AGBL5	ATP/GTP binding protein like 5	-0.168115	4.76083	0.221592	0.948398
ENSG00000084710 (EFR3B)	ENSG00000084710	EFR3B	EFR3 homolog B	0.0855321	2.13497	0.728507	0.99492
ENSG00000084731 (KIF3C)	ENSG00000084731	KIF3C	kinesin family member 3C	-0.14655	2.87353	0.646431	0.99492
ENSG00000084733 (RAB10)	ENSG00000084733	RAB10	RAB10, member RAS oncogene family	0.0923711	6.55178	0.329165	0.978767
ENSG00000084754 (HADHA)	ENSG00000084754	HADHA	hydroxyacyl-CoA dehydrogenase trifunctional multienzyme complex subunit alpha	-0.171836	7.47312	0.266122	0.960515
ENSG00000084764 (MAPRE3)	ENSG00000084764	MAPRE3	microtubule associated protein RP/EB family member 3	0.0598404	4.40792	0.681433	0.99492
ENSG00000084774 (CAD)	ENSG00000084774	CAD	carbamoyl-phosphate synthetase 2, aspartate transcarbamylase, and dihydroorotase	0.160275	5.4849	0.325459	0.978328
ENSG00000085063 (CD59)	ENSG00000085063	CD59	CD59 molecule (CD59 blood group)	0.155971	9.04549	0.288833	0.971453
ENSG00000085117 (CD82)	ENSG00000085117	CD82	CD82 molecule	0.0149475	4.36482	0.932783	0.998939
ENSG00000085185 (BCORL1)	ENSG00000085185	BCORL1	BCL6 corepressor like 1	-0.111302	5.02804	0.474041	0.989281
ENSG00000085224 (ATRX)	ENSG00000085224	ATRX	ATRX chromatin remodeler	0.0306625	7.3255	0.781892	0.997994
ENSG00000085265 (FCN1)	ENSG00000085265	FCN1	ficolin 1	0.872545	2.42902	0.0929072	0.874076
ENSG00000085274 (MYNN)	ENSG00000085274	MYNN	myoneurin	0.104207	3.89133	0.506484	0.99492
ENSG00000085276 (MECOM)	ENSG00000085276	MECOM	MDS1 and EVI1 complex locus	-0.275291	7.24476	0.142602	0.912139
ENSG00000085365 (SCAMP1)	ENSG00000085365	SCAMP1	secretory carrier membrane protein 1	-0.0160805	5.07715	0.926054	0.998939
ENSG00000085377 (PREP)	ENSG00000085377	PREP	prolyl endopeptidase	0.195685	4.47053	0.0627044	0.841036
ENSG00000085382 (HACE1)	ENSG00000085382	HACE1	HECT domain and ankyrin repeat containing E3 ubiquitin protein ligase 1	-0.0466378	4.45213	0.765333	0.995526
ENSG00000085415 (SEH1L)	ENSG00000085415	SEH1L	SEH1 like nucleoporin	0.104107	4.91279	0.371335	0.984803
ENSG00000085433 (WDR47)	ENSG00000085433	WDR47	WD repeat domain 47	0.0539722	4.04736	0.647055	0.99492
ENSG00000085449 (WDFY1)	ENSG00000085449	WDFY1	WD repeat and FYVE domain containing 1	0.000750418	5.43579	0.994477	0.998939
ENSG00000085465 (OVGP1)	ENSG00000085465	OVGP1	oviductal glycoprotein 1	0.0340066	1.60068	0.877362	0.998725
ENSG00000085491 (SLC25A24)	ENSG00000085491	SLC25A24	solute carrier family 25 member 24	0.263793	4.76915	0.0942624	0.875335
ENSG00000085511 (MAP3K4)	ENSG00000085511	MAP3K4	mitogen-activated protein kinase kinase kinase 4	-0.0222098	5.40371	0.822645	0.998725
ENSG00000085514 (PILRA)	ENSG00000085514	PILRA	paired immunoglobin like type 2 receptor alpha	-0.232762	2.17138	0.5027	0.99492
ENSG00000085552 (IGSF9)	ENSG00000085552	IGSF9	immunoglobulin superfamily member 9	-0.125505	0.0550629	0.762183	0.995009
ENSG00000085563 (ABCB1)	ENSG00000085563	ABCB1	ATP binding cassette subfamily B member 1	0.113269	6.20809	0.511557	0.99492
ENSG00000085644 (ZNF213)	ENSG00000085644	ZNF213	zinc finger protein 213	0.0337467	3.43678	0.835435	0.998725
ENSG00000085662 (AKR1B1)	ENSG00000085662	AKR1B1	aldo-keto reductase family 1 member B	0.147697	5.5284	0.433296	0.989281
ENSG00000085719 (CPNE3)	ENSG00000085719	CPNE3	copine 3	-0.0971621	6.44568	0.483527	0.992675
ENSG00000085721 (RRN3)	ENSG00000085721	RRN3	RRN3 homolog, RNA polymerase I transcription factor	7.56273	2.35586	0.263569	0.959503
ENSG00000085733 (CTTN)	ENSG00000085733	CTTN	cortactin	0.311482	7.91153	0.0102579	0.535889
ENSG00000085741 (WNT11)	ENSG00000085741	WNT11	Wnt family member 11	-1.34674	-1.09346	0.020777	0.653772
ENSG00000085760 (MTIF2)	ENSG00000085760	MTIF2	mitochondrial translational initiation factor 2	-0.0282717	5.02047	0.791215	0.998396
ENSG00000085788 (DDHD2)	ENSG00000085788	DDHD2	DDHD domain containing 2	0.0520436	5.54283	0.664187	0.99492
ENSG00000085831 (TTC39A)	ENSG00000085831	TTC39A	tetratricopeptide repeat domain 39A	0.57387	5.81869	0.0332409	0.754903
ENSG00000085832 (EPS15)	ENSG00000085832	EPS15	epidermal growth factor receptor pathway substrate 15	-0.0139363	6.70976	0.877085	0.998725
ENSG00000085840 (ORC1)	ENSG00000085840	ORC1	origin recognition complex subunit 1	0.337727	0.436259	0.329643	0.978767
ENSG00000085871 (MGST2)	ENSG00000085871	MGST2	microsomal glutathione S-transferase 2	0.0547698	4.25685	0.714258	0.99492
ENSG00000085872 (CHERP)	ENSG00000085872	CHERP	calcium homeostasis endoplasmic reticulum protein	0.0201992	5.58736	0.833579	0.998725
ENSG00000085978 (ATG16L1)	ENSG00000085978	ATG16L1	autophagy related 16 like 1	0.206314	4.70637	0.0417279	0.793747
ENSG00000085982 (USP40)	ENSG00000085982	USP40	ubiquitin specific peptidase 40	-0.0385969	6.17903	0.698402	0.99492
ENSG00000085998 (POMGNT1)	ENSG00000085998	POMGNT1	protein O-linked mannose N-acetylglucosaminyltransferase 1 (beta 1,2-)	0.158393	5.89605	0.248099	0.954601
ENSG00000085999 (RAD54L)	ENSG00000085999	RAD54L	RAD54 like	0.318515	1.14044	0.369863	0.984803
ENSG00000086015 (MAST2)	ENSG00000086015	MAST2	microtubule associated serine/threonine kinase 2	-0.0989743	5.6095	0.431442	0.989281
ENSG00000086061 (DNAJA1)	ENSG00000086061	DNAJA1	DnaJ heat shock protein family (Hsp40) member A1	0.0133217	6.40867	0.941071	0.998939
ENSG00000086062 (B4GALT1)	ENSG00000086062	B4GALT1	beta-1,4-galactosyltransferase 1	-0.0329025	7.09362	0.827418	0.998725
ENSG00000086065 (CHMP5)	ENSG00000086065	CHMP5	charged multivesicular body protein 5	-0.0595421	4.86239	0.603148	0.99492
ENSG00000086102 (NFX1)	ENSG00000086102	NFX1	nuclear transcription factor, X-box binding 1	0.124131	5.94089	0.22455	0.948468
ENSG00000086159 (AQP6)	ENSG00000086159	AQP6	aquaporin 6	0.298833	5.67126	0.473768	0.989281
ENSG00000086189 (DIMT1)	ENSG00000086189	DIMT1	DIMT1 rRNA methyltransferase and ribosome maturation factor	0.243631	2.87185	0.177029	0.926446
ENSG00000086200 (IPO11)	ENSG00000086200	IPO11	importin 11	-0.0134582	4.42054	0.917716	0.998939
ENSG00000086205 (FOLH1)	ENSG00000086205	FOLH1	folate hydrolase 1	-0.265525	3.59169	0.454505	0.989281
ENSG00000086232 (EIF2AK1)	ENSG00000086232	EIF2AK1	eukaryotic translation initiation factor 2 alpha kinase 1	-0.0191795	6.2992	0.815361	0.998396
ENSG00000086289 (EPDR1)	ENSG00000086289	EPDR1	ependymin related 1	0.106852	4.38588	0.442118	0.989281
ENSG00000086300 (SNX10)	ENSG00000086300	SNX10	sorting nexin 10	0.330486	5.02664	0.178481	0.926513
ENSG00000086475 (SEPHS1)	ENSG00000086475	SEPHS1	selenophosphate synthetase 1	-0.019681	5.26547	0.862835	0.998725
ENSG00000086504 (MRPL28)	ENSG00000086504	MRPL28	mitochondrial ribosomal protein L28	0.01896	4.61772	0.852298	0.998725
ENSG00000086544 (ITPKC)	ENSG00000086544	ITPKC	inositol-trisphosphate 3-kinase C	0.335899	4.79749	0.121772	0.90314
ENSG00000086570 (FAT2)	ENSG00000086570	FAT2	FAT atypical cadherin 2	-1.00769	-0.105635	0.0535561	0.82259
ENSG00000086589 (RBM22)	ENSG00000086589	RBM22	RNA binding motif protein 22	0.0501877	4.7966	0.58915	0.99492
ENSG00000086598 (TMED2)	ENSG00000086598	TMED2	transmembrane p24 trafficking protein 2	0.0874658	6.61591	0.48131	0.990906
ENSG00000086619 (ERO1B)	ENSG00000086619	ERO1B	endoplasmic reticulum oxidoreductase 1 beta	0.0253718	4.00701	0.891505	0.998725
ENSG00000086666 (ZFAND6)	ENSG00000086666	ZFAND6	zinc finger AN1-type containing 6	0.18665	5.26886	0.129798	0.90314
ENSG00000086696 (HSD17B2)	ENSG00000086696	HSD17B2	hydroxysteroid 17-beta dehydrogenase 2	-0.436663	-0.300185	0.333812	0.980398
ENSG00000086712 (TXLNG)	ENSG00000086712	TXLNG	taxilin gamma	-0.0518816	4.42785	0.664236	0.99492
ENSG00000086730 (LAT2)	ENSG00000086730	LAT2	linker for activation of T cells family member 2	-0.0460081	2.32086	0.870179	0.998725
ENSG00000086758 (HUWE1)	ENSG00000086758	HUWE1	HECT, UBA and WWE domain containing E3 ubiquitin protein ligase 1	0.0472123	9.1451	0.589081	0.99492
ENSG00000086827 (ZW10)	ENSG00000086827	ZW10	zw10 kinetochore protein	0.155643	3.79426	0.21177	0.9443
ENSG00000086848 (ALG9)	ENSG00000086848	ALG9	ALG9 alpha-1,2-mannosyltransferase	0.0569217	4.40826	0.625797	0.99492
ENSG00000086967 (MYBPC2)	ENSG00000086967	MYBPC2	myosin binding protein C2	0.574838	0.732321	0.492883	0.994432
ENSG00000086991 (NOX4)	ENSG00000086991	NOX4	NADPH oxidase 4	0.337958	6.31885	0.290107	0.971453
ENSG00000087008 (ACOX3)	ENSG00000087008	ACOX3	acyl-CoA oxidase 3, pristanoyl	0.00699884	4.48047	0.948735	0.998939
ENSG00000087053 (MTMR2)	ENSG00000087053	MTMR2	myotubularin related protein 2	0.0800054	5.33954	0.519089	0.99492
ENSG00000087074 (PPP1R15A)	ENSG00000087074	PPP1R15A	protein phosphatase 1 regulatory subunit 15A	0.00569539	5.20193	0.983313	0.998939
ENSG00000087076 (HSD17B14)	ENSG00000087076	HSD17B14	hydroxysteroid 17-beta dehydrogenase 14	0.052647	4.88843	0.756668	0.995009
ENSG00000087077 (TRIP6)	ENSG00000087077	TRIP6	thyroid hormone receptor interactor 6	-0.0746035	5.74768	0.600482	0.99492
ENSG00000087085 (ACHE)	ENSG00000087085	ACHE	acetylcholinesterase (Cartwright blood group)	0.0795674	1.15774	0.845162	0.998725
ENSG00000087086 (FTL)	ENSG00000087086	FTL	ferritin light chain	0.0123786	10.8636	0.959509	0.998939
ENSG00000087087 (SRRT)	ENSG00000087087	SRRT	serrate, RNA effector molecule	0.0941686	6.20992	0.439727	0.989281
ENSG00000087088 (BAX)	ENSG00000087088	BAX	BCL2 associated X, apoptosis regulator	-0.0204719	4.36315	0.907146	0.998725
ENSG00000087095 (NLK)	ENSG00000087095	NLK	nemo like kinase	0.141949	4.99688	0.271793	0.966375
ENSG00000087111 (PIGS)	ENSG00000087111	PIGS	phosphatidylinositol glycan anchor biosynthesis class S	0.114001	5.68634	0.283235	0.970364
ENSG00000087116 (ADAMTS2)	ENSG00000087116	ADAMTS2	ADAM metallopeptidase with thrombospondin type 1 motif 2	0.307346	4.9761	0.228494	0.949561
ENSG00000087152 (ATXN7L3)	ENSG00000087152	ATXN7L3	ataxin 7 like 3	0.210137	5.52768	0.0931569	0.874478
ENSG00000087157 (PGS1)	ENSG00000087157	PGS1	phosphatidylglycerophosphate synthase 1	0.15989	5.09204	0.33466	0.980398
ENSG00000087191 (PSMC5)	ENSG00000087191	PSMC5	proteasome 26S subunit, ATPase 5	0.0727836	6.30785	0.451215	0.989281
ENSG00000087206 (UIMC1)	ENSG00000087206	UIMC1	ubiquitin interaction motif containing 1	0.0448499	4.7438	0.687046	0.99492
ENSG00000087237 (CETP)	ENSG00000087237	CETP	cholesteryl ester transfer protein	-0.2952	0.851153	0.616652	0.99492
ENSG00000087245 (MMP2)	ENSG00000087245	MMP2	matrix metallopeptidase 2	-0.466821	6.00784	0.0159261	0.616149
ENSG00000087250 (MT3)	ENSG00000087250	MT3	metallothionein 3	-0.545327	-0.665225	0.35534	0.983713
ENSG00000087253 (LPCAT2)	ENSG00000087253	LPCAT2	lysophosphatidylcholine acyltransferase 2	-0.103239	4.39975	0.638543	0.99492
ENSG00000087258 (GNAO1)	ENSG00000087258	GNAO1	G protein subunit alpha o1	0.0263396	2.83137	0.925972	0.998939
ENSG00000087263 (OGFOD1)	ENSG00000087263	OGFOD1	2-oxoglutarate and iron dependent oxygenase domain containing 1	0.174766	4.82964	0.16196	0.926446
ENSG00000087266 (SH3BP2)	ENSG00000087266	SH3BP2	SH3 domain binding protein 2	0.679487	7.9604	0.014491	0.600015
ENSG00000087269 (NOP14)	ENSG00000087269	NOP14	NOP14 nucleolar protein	0.222036	5.17565	0.0725119	0.852233
ENSG00000087274 (ADD1)	ENSG00000087274	ADD1	adducin 1	0.0492119	8.09752	0.627649	0.99492
ENSG00000087299 (L2HGDH)	ENSG00000087299	L2HGDH	L-2-hydroxyglutarate dehydrogenase	-0.143576	5.14072	0.445438	0.989281
ENSG00000087301 (TXNDC16)	ENSG00000087301	TXNDC16	thioredoxin domain containing 16	-0.120916	2.93564	0.561098	0.99492
ENSG00000087302 (RTRAF)	ENSG00000087302	RTRAF	RNA transcription, translation and transport factor	0.221904	4.94014	0.0497955	0.818372
ENSG00000087303 (NID2)	ENSG00000087303	NID2	nidogen 2	0.233536	5.4542	0.30039	0.971768
ENSG00000087338 (GMCL1)	ENSG00000087338	GMCL1	germ cell-less 1, spermatogenesis associated	-0.236812	4.02007	0.130825	0.90314
ENSG00000087365 (SF3B2)	ENSG00000087365	SF3B2	splicing factor 3b subunit 2	0.145221	7.11111	0.106666	0.893139
ENSG00000087448 (KLHL42)	ENSG00000087448	KLHL42	kelch like family member 42	-0.0917291	5.4263	0.456715	0.989281
ENSG00000087460 (GNAS)	ENSG00000087460	GNAS	GNAS complex locus	-0.122241	8.54611	0.242681	0.953502
ENSG00000087470 (DNM1L)	ENSG00000087470	DNM1L	dynamin 1 like	0.188771	5.91053	0.146762	0.915199
ENSG00000087495 (PHACTR3)	ENSG00000087495	PHACTR3	phosphatase and actin regulator 3	0.0803986	1.61036	0.815285	0.998396
ENSG00000087502 (ERGIC2)	ENSG00000087502	ERGIC2	ERGIC and golgi 2	0.134001	4.87604	0.362847	0.984616
ENSG00000087510 (TFAP2C)	ENSG00000087510	TFAP2C	transcription factor AP-2 gamma	-0.367342	-0.850871	0.498971	0.99492
ENSG00000087586 (AURKA)	ENSG00000087586	AURKA	aurora kinase A	0.0911454	1.63506	0.742691	0.995009
ENSG00000087589 (CASS4)	ENSG00000087589	CASS4	Cas scaffold protein family member 4	-0.0103809	1.19307	0.966357	0.998939
ENSG00000087842 (PIR)	ENSG00000087842	PIR	pirin	0.475984	2.88519	0.0361243	0.76867
ENSG00000087884 (AAMDC)	ENSG00000087884	AAMDC	adipogenesis associated Mth938 domain containing	-0.042753	2.86257	0.752109	0.995009
ENSG00000087903 (RFX2)	ENSG00000087903	RFX2	regulatory factor X2	0.114605	2.73261	0.588547	0.99492
ENSG00000087995 (METTL2A)	ENSG00000087995	METTL2A	methyltransferase like 2A	0.0843902	4.20846	0.473776	0.989281
ENSG00000088002 (SULT2B1)	ENSG00000088002	SULT2B1	sulfotransferase family 2B member 1	1.46935	1.16556	0.00783107	0.491941
ENSG00000088035 (ALG6)	ENSG00000088035	ALG6	ALG6 alpha-1,3-glucosyltransferase	0.103959	2.7886	0.66888	0.99492
ENSG00000088038 (CNOT3)	ENSG00000088038	CNOT3	CCR4-NOT transcription complex subunit 3	0.315984	4.86736	0.0711683	0.852047
ENSG00000088179 (PTPN4)	ENSG00000088179	PTPN4	protein tyrosine phosphatase non-receptor type 4	-0.162603	5.58774	0.454432	0.989281
ENSG00000088205 (DDX18)	ENSG00000088205	DDX18	DEAD-box helicase 18	0.117295	5.57695	0.343391	0.98148
ENSG00000088247 (KHSRP)	ENSG00000088247	KHSRP	KH-type splicing regulatory protein	0.0037138	6.70304	0.969685	0.998939
ENSG00000088256 (GNA11)	ENSG00000088256	GNA11	G protein subunit alpha 11	-0.0610108	6.8929	0.592104	0.99492
ENSG00000088280 (ASAP3)	ENSG00000088280	ASAP3	ArfGAP with SH3 domain, ankyrin repeat and PH domain 3	0.162033	5.48572	0.318481	0.976671
ENSG00000088298 (EDEM2)	ENSG00000088298	EDEM2	ER degradation enhancing alpha-mannosidase like protein 2	0.154462	4.41786	0.0929928	0.874076
ENSG00000088305 (DNMT3B)	ENSG00000088305	DNMT3B	DNA methyltransferase 3 beta	0.310322	2.69535	0.117679	0.90061
ENSG00000088320 (REM1)	ENSG00000088320	REM1	RRAD and GEM like GTPase 1	-0.49399	0.20715	0.18163	0.928014
ENSG00000088325 (TPX2)	ENSG00000088325	TPX2	TPX2 microtubule nucleation factor	-0.402674	1.32601	0.48834	0.993887
ENSG00000088340 (FER1L4)	ENSG00000088340	FER1L4	fer-1 like family member 4 (pseudogene)	0.408409	3.79814	0.175783	0.926446
ENSG00000088356 (PDRG1)	ENSG00000088356	PDRG1	p53 and DNA damage regulated 1	-0.0440029	3.08421	0.748826	0.995009
ENSG00000088367 (EPB41L1)	ENSG00000088367	EPB41L1	erythrocyte membrane protein band 4.1 like 1	0.0361286	7.49006	0.834955	0.998725
ENSG00000088386 (SLC15A1)	ENSG00000088386	SLC15A1	solute carrier family 15 member 1	0.648885	4.31063	0.069219	0.852047
ENSG00000088387 (DOCK9)	ENSG00000088387	DOCK9	dedicator of cytokinesis 9	0.302964	6.42664	0.0757485	0.856894
ENSG00000088448 (ANKRD10)	ENSG00000088448	ANKRD10	ankyrin repeat domain 10	0.128464	6.21962	0.306666	0.973295
ENSG00000088451 (TGDS)	ENSG00000088451	TGDS	TDP-glucose 4,6-dehydratase	0.0860584	2.67365	0.646336	0.99492
ENSG00000088538 (DOCK3)	ENSG00000088538	DOCK3	dedicator of cytokinesis 3	-0.421377	2.59934	0.24213	0.953502
ENSG00000088543 (C3orf18)	ENSG00000088543	C3orf18	chromosome 3 open reading frame 18	-0.384286	2.93603	0.0478549	0.810879
ENSG00000088682 (COQ9)	ENSG00000088682	COQ9	coenzyme Q9	-0.178824	6.08314	0.167507	0.926446
ENSG00000088727 (KIF9)	ENSG00000088727	KIF9	kinesin family member 9	-0.0536558	2.7027	0.754321	0.995009
ENSG00000088756 (ARHGAP28)	ENSG00000088756	ARHGAP28	Rho GTPase activating protein 28	-0.0949979	4.49668	0.672464	0.99492
ENSG00000088766 (CRLS1)	ENSG00000088766	CRLS1	cardiolipin synthase 1	0.131812	5.00404	0.475678	0.989281
ENSG00000088808 (PPP1R13B)	ENSG00000088808	PPP1R13B	protein phosphatase 1 regulatory subunit 13B	0.0467253	5.82402	0.64903	0.99492
ENSG00000088812 (ATRN)	ENSG00000088812	ATRN	attractin	0.0193162	6.79321	0.852925	0.998725
ENSG00000088826 (SMOX)	ENSG00000088826	SMOX	spermine oxidase	0.275899	2.72711	0.462506	0.989281
ENSG00000088827 (SIGLEC1)	ENSG00000088827	SIGLEC1	sialic acid binding Ig like lectin 1	-0.570452	4.34425	0.258436	0.957807
ENSG00000088832 (FKBP1A)	ENSG00000088832	FKBP1A	FKBP prolyl isomerase 1A	0.174258	6.74706	0.169073	0.926446
ENSG00000088833 (NSFL1C)	ENSG00000088833	NSFL1C	NSFL1 cofactor	0.226936	5.41631	0.0379728	0.781005
ENSG00000088836 (SLC4A11)	ENSG00000088836	SLC4A11	solute carrier family 4 member 11	0.230797	3.53172	0.447507	0.989281
ENSG00000088854 (C20orf194)	ENSG00000088854	C20orf194	chromosome 20 open reading frame 194	-0.0153862	6.43922	0.899813	0.998725
ENSG00000088876 (ZNF343)	ENSG00000088876	ZNF343	zinc finger protein 343	0.0310906	3.8752	0.781469	0.997994
ENSG00000088881 (EBF4)	ENSG00000088881	EBF4	EBF family member 4	-0.00468765	3.3006	0.978083	0.998939
ENSG00000088882 (CPXM1)	ENSG00000088882	CPXM1	carboxypeptidase X, M14 family member 1	0.037664	2.24116	0.936479	0.998939
ENSG00000088888 (MAVS)	ENSG00000088888	MAVS	mitochondrial antiviral signaling protein	-0.0228297	7.99684	0.805541	0.998396
ENSG00000088899 (LZTS3)	ENSG00000088899	LZTS3	leucine zipper tumor suppressor family member 3	-0.447305	6.07161	0.00258095	0.320762
ENSG00000088926 (F11)	ENSG00000088926	F11	coagulation factor XI	-0.823419	4.27327	0.0843691	0.864726
ENSG00000088930 (XRN2)	ENSG00000088930	XRN2	5'-3' exoribonuclease 2	0.176556	5.98879	0.0779901	0.858743
ENSG00000088970 (KIZ)	ENSG00000088970	KIZ	kizuna centrosomal protein	-0.00309888	4.50059	0.984324	0.998939
ENSG00000088986 (DYNLL1)	ENSG00000088986	DYNLL1	dynein light chain LC8-type 1	-0.0250786	5.79075	0.83316	0.998725
ENSG00000088992 (TESC)	ENSG00000088992	TESC	tescalcin	-0.339976	2.21206	0.330798	0.979354
ENSG00000089006 (SNX5)	ENSG00000089006	SNX5	sorting nexin 5	0.0372397	6.5399	0.778105	0.997965
ENSG00000089009 (RPL6)	ENSG00000089009	RPL6	ribosomal protein L6	-0.082524	7.9842	0.435285	0.989281
ENSG00000089022 (MAPKAPK5)	ENSG00000089022	MAPKAPK5	MAPK activated protein kinase 5	0.157609	5.60857	0.166194	0.926446
ENSG00000089041 (P2RX7)	ENSG00000089041	P2RX7	purinergic receptor P2X 7	-0.545508	1.98409	0.123288	0.90314
ENSG00000089048 (ESF1)	ENSG00000089048	ESF1	ESF1 nucleolar pre-rRNA processing protein homolog	0.0985561	4.27003	0.370887	0.984803
ENSG00000089050 (RBBP9)	ENSG00000089050	RBBP9	RB binding protein 9, serine hydrolase	-0.0373201	4.66028	0.781942	0.997994
ENSG00000089053 (ANAPC5)	ENSG00000089053	ANAPC5	anaphase promoting complex subunit 5	0.153724	6.48226	0.129288	0.90314
ENSG00000089057 (SLC23A2)	ENSG00000089057	SLC23A2	solute carrier family 23 member 2	-0.00785704	5.22649	0.946815	0.998939
ENSG00000089060 (SLC8B1)	ENSG00000089060	SLC8B1	solute carrier family 8 member B1	0.120006	5.19421	0.248357	0.954601
ENSG00000089063 (TMEM230)	ENSG00000089063	TMEM230	transmembrane protein 230	-0.118135	5.59764	0.289912	0.971453
ENSG00000089091 (DZANK1)	ENSG00000089091	DZANK1	double zinc ribbon and ankyrin repeat domains 1	0.132871	2.99263	0.404105	0.987767
ENSG00000089094 (KDM2B)	ENSG00000089094	KDM2B	lysine demethylase 2B	-0.0698418	4.74465	0.699069	0.99492
ENSG00000089101 (CFAP61)	ENSG00000089101	CFAP61	cilia and flagella associated protein 61	-0.0859328	0.293616	0.806398	0.998396
ENSG00000089123 (TASP1)	ENSG00000089123	TASP1	taspase 1	0.0560931	3.75523	0.632696	0.99492
ENSG00000089127 (OAS1)	ENSG00000089127	OAS1	2'-5'-oligoadenylate synthetase 1	0.445628	4.21957	0.176084	0.926446
ENSG00000089154 (GCN1)	ENSG00000089154	GCN1	GCN1 activator of EIF2AK4	0.103397	7.2547	0.301009	0.971865
ENSG00000089157 (RPLP0)	ENSG00000089157	RPLP0	ribosomal protein lateral stalk subunit P0	0.0988953	8.20275	0.476373	0.989281
ENSG00000089159 (PXN)	ENSG00000089159	PXN	paxillin	0.027586	7.10064	0.815013	0.998396
ENSG00000089163 (SIRT4)	ENSG00000089163	SIRT4	sirtuin 4	-0.360248	0.71609	0.1518	0.920776
ENSG00000089169 (RPH3A)	ENSG00000089169	RPH3A	rabphilin 3A	-1.45341	-0.453608	0.00514707	0.419295
ENSG00000089177 (KIF16B)	ENSG00000089177	KIF16B	kinesin family member 16B	-0.202142	6.03641	0.0971665	0.880321
ENSG00000089195 (TRMT6)	ENSG00000089195	TRMT6	tRNA methyltransferase 6	0.0927776	3.33546	0.57734	0.99492
ENSG00000089199 (CHGB)	ENSG00000089199	CHGB	chromogranin B	-1.41228	3.01651	0.00866037	0.502929
ENSG00000089220 (PEBP1)	ENSG00000089220	PEBP1	phosphatidylethanolamine binding protein 1	-0.168907	8.63707	0.299685	0.971768
ENSG00000089234 (BRAP)	ENSG00000089234	BRAP	BRCA1 associated protein	0.126271	4.23838	0.224779	0.948468
ENSG00000089248 (ERP29)	ENSG00000089248	ERP29	endoplasmic reticulum protein 29	-0.136353	6.14341	0.229558	0.949942
ENSG00000089250 (NOS1)	ENSG00000089250	NOS1	nitric oxide synthase 1	0.00487886	4.88123	0.98752	0.998939
ENSG00000089280 (FUS)	ENSG00000089280	FUS	FUS RNA binding protein	0.192858	7.40499	0.0639967	0.844584
ENSG00000089289 (IGBP1)	ENSG00000089289	IGBP1	immunoglobulin binding protein 1	-0.191012	4.65102	0.173225	0.926446
ENSG00000089327 (FXYD5)	ENSG00000089327	FXYD5	FXYD domain containing ion transport regulator 5	0.146369	2.97647	0.623611	0.99492
ENSG00000089335 (ZNF302)	ENSG00000089335	ZNF302	zinc finger protein 302	-0.253818	4.63522	0.0646091	0.845644
ENSG00000089351 (GRAMD1A)	ENSG00000089351	GRAMD1A	GRAM domain containing 1A	0.325912	5.41368	0.0475504	0.809779
ENSG00000089356 (FXYD3)	ENSG00000089356	FXYD3	FXYD domain containing ion transport regulator 3	-1.04195	0.234003	0.00128179	0.252024
ENSG00000089472 (HEPH)	ENSG00000089472	HEPH	hephaestin	-0.258269	3.79496	0.226857	0.949077
ENSG00000089486 (CDIP1)	ENSG00000089486	CDIP1	cell death inducing p53 target 1	-0.202066	4.85171	0.158023	0.925343
ENSG00000089505 (CMTM1)	ENSG00000089505	CMTM1	CKLF like MARVEL transmembrane domain containing 1	0.0623052	0.34865	0.851538	0.998725
ENSG00000089597 (GANAB)	ENSG00000089597	GANAB	glucosidase II alpha subunit	0.0131112	7.94567	0.886183	0.998725
ENSG00000089639 (GMIP)	ENSG00000089639	GMIP	GEM interacting protein	0.177235	3.3418	0.551681	0.99492
ENSG00000089682 (RBM41)	ENSG00000089682	RBM41	RNA binding motif protein 41	0.0126558	4.6045	0.921905	0.998939
ENSG00000089685 (BIRC5)	ENSG00000089685	BIRC5	baculoviral IAP repeat containing 5	-0.431439	0.685375	0.394545	0.98756
ENSG00000089692 (LAG3)	ENSG00000089692	LAG3	lymphocyte activating 3	0.488967	-0.551723	0.132073	0.903594
ENSG00000089693 (MLF2)	ENSG00000089693	MLF2	myeloid leukemia factor 2	0.0816248	6.64277	0.46953	0.989281
ENSG00000089723 (OTUB2)	ENSG00000089723	OTUB2	OTU deubiquitinase, ubiquitin aldehyde binding 2	-0.363954	0.974877	0.317982	0.976538
ENSG00000089737 (DDX24)	ENSG00000089737	DDX24	DEAD-box helicase 24	0.0954495	5.01691	0.554384	0.99492
ENSG00000089775 (ZBTB25)	ENSG00000089775	ZBTB25	zinc finger and BTB domain containing 25	-0.0176796	4.85744	0.895703	0.998725
ENSG00000089818 (NECAP1)	ENSG00000089818	NECAP1	NECAP endocytosis associated 1	0.10789	4.76956	0.33812	0.980657
ENSG00000089820 (ARHGAP4)	ENSG00000089820	ARHGAP4	Rho GTPase activating protein 4	-0.028783	4.64972	0.886565	0.998725
ENSG00000089847 (ANKRD24)	ENSG00000089847	ANKRD24	ankyrin repeat domain 24	-0.663898	2.43933	0.00758963	0.487062
ENSG00000089876 (DHX32)	ENSG00000089876	DHX32	DEAH-box helicase 32 (putative)	0.0170332	4.47253	0.86654	0.998725
ENSG00000089902 (RCOR1)	ENSG00000089902	RCOR1	REST corepressor 1	-0.0648656	5.07333	0.524814	0.99492
ENSG00000089916 (GPATCH2L)	ENSG00000089916	GPATCH2L	G-patch domain containing 2 like	0.0176391	6.6293	0.881612	0.998725
ENSG00000090006 (LTBP4)	ENSG00000090006	LTBP4	latent transforming growth factor beta binding protein 4	-0.486065	6.82024	0.0170414	0.626821
ENSG00000090013 (BLVRB)	ENSG00000090013	BLVRB	biliverdin reductase B	0.249529	4.79464	0.150736	0.919337
ENSG00000090020 (SLC9A1)	ENSG00000090020	SLC9A1	solute carrier family 9 member A1	-0.0709531	5.18487	0.649897	0.99492
ENSG00000090054 (SPTLC1)	ENSG00000090054	SPTLC1	serine palmitoyltransferase long chain base subunit 1	0.104173	5.4067	0.368013	0.984616
ENSG00000090060 (PAPOLA)	ENSG00000090060	PAPOLA	poly(A) polymerase alpha	-0.0294371	7.2647	0.821614	0.998725
ENSG00000090061 (CCNK)	ENSG00000090061	CCNK	cyclin K	0.232998	5.19622	0.0300147	0.7296
ENSG00000090097 (PCBP4)	ENSG00000090097	PCBP4	poly(rC) binding protein 4	0.0904924	4.08621	0.57241	0.99492
ENSG00000090104 (RGS1)	ENSG00000090104	RGS1	regulator of G protein signaling 1	0.127842	2.39527	0.830423	0.998725
ENSG00000090238 (YPEL3)	ENSG00000090238	YPEL3	yippee like 3	-0.343595	4.83561	0.0990514	0.883874
ENSG00000090263 (MRPS33)	ENSG00000090263	MRPS33	mitochondrial ribosomal protein S33	-0.164996	3.93059	0.243451	0.953581
ENSG00000090266 (NDUFB2)	ENSG00000090266	NDUFB2	NADH:ubiquinone oxidoreductase subunit B2	-0.101203	5.42586	0.368117	0.984616
ENSG00000090273 (NUDC)	ENSG00000090273	NUDC	nuclear distribution C, dynein complex regulator	0.0509024	5.5362	0.628301	0.99492
ENSG00000090316 (MAEA)	ENSG00000090316	MAEA	macrophage erythroblast attacher	0.0824395	6.22705	0.376596	0.986205
ENSG00000090339 (ICAM1)	ENSG00000090339	ICAM1	intercellular adhesion molecule 1	0.464694	5.27083	0.234961	0.953245
ENSG00000090372 (STRN4)	ENSG00000090372	STRN4	striatin 4	0.160813	5.90237	0.125514	0.90314
ENSG00000090376 (IRAK3)	ENSG00000090376	IRAK3	interleukin 1 receptor associated kinase 3	0.372421	5.00236	0.163173	0.926446
ENSG00000090382 (LYZ)	ENSG00000090382	LYZ	lysozyme	-0.288824	4.27745	0.464599	0.989281
ENSG00000090432 (MUL1)	ENSG00000090432	MUL1	mitochondrial E3 ubiquitin protein ligase 1	-0.000682129	4.93974	0.994918	0.998939
ENSG00000090447 (TFAP4)	ENSG00000090447	TFAP4	transcription factor AP-4	-0.196018	2.91509	0.438605	0.989281
ENSG00000090470 (PDCD7)	ENSG00000090470	PDCD7	programmed cell death 7	-0.118096	4.38234	0.388327	0.98756
ENSG00000090487 (SPG21)	ENSG00000090487	SPG21	SPG21 abhydrolase domain containing, maspardin	0.179289	5.68134	0.0861896	0.864726
ENSG00000090520 (DNAJB11)	ENSG00000090520	DNAJB11	DnaJ heat shock protein family (Hsp40) member B11	0.276674	5.12866	0.0726673	0.852233
ENSG00000090530 (P3H2)	ENSG00000090530	P3H2	prolyl 3-hydroxylase 2	0.673853	7.01135	0.000179933	0.105178
ENSG00000090534 (THPO)	ENSG00000090534	THPO	thrombopoietin	0.236839	2.29858	0.467124	0.989281
ENSG00000090539 (CHRD)	ENSG00000090539	CHRD	chordin	0.0900512	5.5546	0.772812	0.997175
ENSG00000090554 (FLT3LG)	ENSG00000090554	FLT3LG	fms related tyrosine kinase 3 ligand	-0.0951596	1.85735	0.741653	0.995009
ENSG00000090565 (RAB11FIP3)	ENSG00000090565	RAB11FIP3	RAB11 family interacting protein 3	-0.135368	8.00245	0.540417	0.99492
ENSG00000090581 (GNPTG)	ENSG00000090581	GNPTG	N-acetylglucosamine-1-phosphate transferase subunit gamma	0.0740154	5.57645	0.495729	0.994432
ENSG00000090612 (ZNF268)	ENSG00000090612	ZNF268	zinc finger protein 268	-0.115226	5.07597	0.288102	0.971453
ENSG00000090615 (GOLGA3)	ENSG00000090615	GOLGA3	golgin A3	0.0203242	7.08178	0.878033	0.998725
ENSG00000090621 (PABPC4)	ENSG00000090621	PABPC4	poly(A) binding protein cytoplasmic 4	-0.0235626	6.25566	0.853456	0.998725
ENSG00000090659 (CD209)	ENSG00000090659	CD209	CD209 molecule	-0.516872	3.3511	0.265964	0.960471
ENSG00000090661 (CERS4)	ENSG00000090661	CERS4	ceramide synthase 4	-0.262861	5.44472	0.0330559	0.754149
ENSG00000090674 (MCOLN1)	ENSG00000090674	MCOLN1	mucolipin 1	0.316118	4.04386	0.0746472	0.853998
ENSG00000090686 (USP48)	ENSG00000090686	USP48	ubiquitin specific peptidase 48	-0.0133521	5.77709	0.910118	0.998725
ENSG00000090776 (EFNB1)	ENSG00000090776	EFNB1	ephrin B1	0.147122	6.22544	0.300409	0.971768
ENSG00000090857 (PDPR)	ENSG00000090857	PDPR	pyruvate dehydrogenase phosphatase regulatory subunit	-0.264911	6.66466	0.190753	0.931527
ENSG00000090861 (AARS1)	ENSG00000090861	AARS1	alanyl-tRNA synthetase 1	-0.135763	6.65884	0.139386	0.90802
ENSG00000090863 (GLG1)	ENSG00000090863	GLG1	golgi glycoprotein 1	0.024794	8.3816	0.859776	0.998725
ENSG00000090889 (KIF4A)	ENSG00000090889	KIF4A	kinesin family member 4A	-0.482142	-0.00378494	0.431059	0.989281
ENSG00000090905 (TNRC6A)	ENSG00000090905	TNRC6A	trinucleotide repeat containing adaptor 6A	0.0287285	7.26242	0.798	0.998396
ENSG00000090924 (PLEKHG2)	ENSG00000090924	PLEKHG2	pleckstrin homology and RhoGEF domain containing G2	0.153104	5.26985	0.340523	0.980657
ENSG00000090971 (NAT14)	ENSG00000090971	NAT14	N-acetyltransferase 14 (putative)	0.0607665	2.70158	0.712594	0.99492
ENSG00000090975 (PITPNM2)	ENSG00000090975	PITPNM2	phosphatidylinositol transfer protein membrane associated 2	0.309449	6.07559	0.113049	0.89684
ENSG00000090989 (EXOC1)	ENSG00000090989	EXOC1	exocyst complex component 1	0.10854	5.16588	0.280729	0.968963
ENSG00000091009 (RBM27)	ENSG00000091009	RBM27	RNA binding motif protein 27	-0.00394586	5.14968	0.979384	0.998939
ENSG00000091039 (OSBPL8)	ENSG00000091039	OSBPL8	oxysterol binding protein like 8	0.0666415	6.84027	0.671124	0.99492
ENSG00000091073 (DTX2)	ENSG00000091073	DTX2	deltex E3 ubiquitin ligase 2	0.0241195	3.80487	0.901034	0.998725
ENSG00000091106 (NLRC4)	ENSG00000091106	NLRC4	NLR family CARD domain containing 4	0.523984	0.668268	0.180345	0.927005
ENSG00000091127 (PUS7)	ENSG00000091127	PUS7	pseudouridine synthase 7	0.171082	3.29176	0.413695	0.988956
ENSG00000091128 (LAMB4)	ENSG00000091128	LAMB4	laminin subunit beta 4	-0.700909	2.496	0.0136007	0.588922
ENSG00000091129 (NRCAM)	ENSG00000091129	NRCAM	neuronal cell adhesion molecule	0.0125671	4.8236	0.964452	0.998939
ENSG00000091136 (LAMB1)	ENSG00000091136	LAMB1	laminin subunit beta 1	0.063576	8.74072	0.546052	0.99492
ENSG00000091137 (SLC26A4)	ENSG00000091137	SLC26A4	solute carrier family 26 member 4	-0.128939	4.32448	0.777291	0.997965
ENSG00000091140 (DLD)	ENSG00000091140	DLD	dihydrolipoamide dehydrogenase	-0.153718	6.28896	0.277912	0.968192
ENSG00000091157 (WDR7)	ENSG00000091157	WDR7	WD repeat domain 7	0.0846213	5.69889	0.41424	0.988956
ENSG00000091164 (TXNL1)	ENSG00000091164	TXNL1	thioredoxin like 1	0.0273441	5.35073	0.844222	0.998725
ENSG00000091262 (ABCC6)	ENSG00000091262	ABCC6	ATP binding cassette subfamily C member 6	0.0516999	4.94572	0.91149	0.998725
ENSG00000091317 (CMTM6)	ENSG00000091317	CMTM6	CKLF like MARVEL transmembrane domain containing 6	0.0680635	5.58123	0.613931	0.99492
ENSG00000091409 (ITGA6)	ENSG00000091409	ITGA6	integrin subunit alpha 6	0.0753351	7.65509	0.642011	0.99492
ENSG00000091428 (RAPGEF4)	ENSG00000091428	RAPGEF4	Rap guanine nucleotide exchange factor 4	-0.168022	3.79898	0.494627	0.994432
ENSG00000091436 (MAP3K20)	ENSG00000091436	MAP3K20	mitogen-activated protein kinase kinase kinase 20	-0.222115	4.79635	0.243902	0.953581
ENSG00000091483 (FH)	ENSG00000091483	FH	fumarate hydratase	-0.238595	5.59234	0.0953338	0.875335
ENSG00000091490 (SEL1L3)	ENSG00000091490	SEL1L3	SEL1L family member 3	-0.0148018	5.44122	0.954499	0.998939
ENSG00000091513 (TF)	ENSG00000091513	TF	transferrin	-0.278872	2.34758	0.139427	0.90802
ENSG00000091527 (CDV3)	ENSG00000091527	CDV3	CDV3 homolog	0.0828742	6.94489	0.51483	0.99492
ENSG00000091536 (MYO15A)	ENSG00000091536	MYO15A	myosin XVA	-0.528907	0.58688	0.0790998	0.859683
ENSG00000091542 (ALKBH5)	ENSG00000091542	ALKBH5	alkB homolog 5, RNA demethylase	-0.0136002	6.87615	0.914892	0.998725
ENSG00000091583 (APOH)	ENSG00000091583	APOH	apolipoprotein H	1.13794	0.684535	0.00797326	0.491941
ENSG00000091592 (NLRP1)	ENSG00000091592	NLRP1	NLR family pyrin domain containing 1	-0.211285	4.39929	0.431783	0.989281
ENSG00000091622 (PITPNM3)	ENSG00000091622	PITPNM3	PITPNM family member 3	0.128149	3.69297	0.493407	0.994432
ENSG00000091640 (SPAG7)	ENSG00000091640	SPAG7	sperm associated antigen 7	0.117385	4.97936	0.316789	0.976418
ENSG00000091651 (ORC6)	ENSG00000091651	ORC6	origin recognition complex subunit 6	0.00407898	5.70508	0.968343	0.998939
ENSG00000091656 (ZFHX4)	ENSG00000091656	ZFHX4	zinc finger homeobox 4	-0.0985552	2.78897	0.720225	0.99492
ENSG00000091732 (ZC3HC1)	ENSG00000091732	ZC3HC1	zinc finger C3HC-type containing 1	0.0584834	3.92222	0.60023	0.99492
ENSG00000091831 (ESR1)	ENSG00000091831	ESR1	estrogen receptor 1	-0.291087	3.10007	0.263255	0.959017
ENSG00000091879 (ANGPT2)	ENSG00000091879	ANGPT2	angiopoietin 2	-0.128853	1.94679	0.749682	0.995009
ENSG00000091947 (TMEM101)	ENSG00000091947	TMEM101	transmembrane protein 101	-0.374313	5.12476	0.106265	0.892894
ENSG00000091972 (CD200)	ENSG00000091972	CD200	CD200 molecule	-0.161945	2.60796	0.514821	0.99492
ENSG00000091986 (CCDC80)	ENSG00000091986	CCDC80	coiled-coil domain containing 80	-0.189408	5.20576	0.504441	0.99492
ENSG00000092010 (PSME1)	ENSG00000092010	PSME1	proteasome activator subunit 1	0.176336	5.75479	0.15732	0.924379
ENSG00000092020 (PPP2R3C)	ENSG00000092020	PPP2R3C	protein phosphatase 2 regulatory subunit B''gamma	-0.000293314	3.17028	0.998852	0.999654
ENSG00000092036 (HAUS4)	ENSG00000092036	HAUS4	HAUS augmin like complex subunit 4	-0.293844	3.96866	0.181971	0.928014
ENSG00000092051 (JPH4)	ENSG00000092051	JPH4	junctophilin 4	-0.288896	1.89932	0.298081	0.971768
ENSG00000092068 (SLC7A8)	ENSG00000092068	SLC7A8	solute carrier family 7 member 8	-0.531264	8.6515	0.0762504	0.858177
ENSG00000092094 (OSGEP)	ENSG00000092094	OSGEP	O-sialoglycoprotein endopeptidase	-0.0409539	4.45327	0.73688	0.994988
ENSG00000092096 (SLC22A17)	ENSG00000092096	SLC22A17	solute carrier family 22 member 17	0.187532	5.0618	0.336902	0.980657
ENSG00000092098 (RNF31)	ENSG00000092098	RNF31	ring finger protein 31	0.216914	5.22764	0.0562023	0.831862
ENSG00000092108 (SCFD1)	ENSG00000092108	SCFD1	sec1 family domain containing 1	0.122322	5.09142	0.352742	0.983386
ENSG00000092140 (G2E3)	ENSG00000092140	G2E3	G2/M-phase specific E3 ubiquitin protein ligase	0.0674473	3.67022	0.693872	0.99492
ENSG00000092148 (HECTD1)	ENSG00000092148	HECTD1	HECT domain E3 ubiquitin protein ligase 1	0.0106685	7.89136	0.90955	0.998725
ENSG00000092199 (HNRNPC)	ENSG00000092199	HNRNPC	heterogeneous nuclear ribonucleoprotein C	-0.00984106	7.79619	0.925638	0.998939
ENSG00000092201 (SUPT16H)	ENSG00000092201	SUPT16H	SPT16 homolog, facilitates chromatin remodeling subunit	0.163455	6.34473	0.0542082	0.824146
ENSG00000092203 (TOX4)	ENSG00000092203	TOX4	TOX high mobility group box family member 4	0.089813	5.85023	0.276581	0.967339
ENSG00000092208 (GEMIN2)	ENSG00000092208	GEMIN2	gem nuclear organelle associated protein 2	0.135215	1.75497	0.471875	0.989281
ENSG00000092295 (TGM1)	ENSG00000092295	TGM1	transglutaminase 1	0.0885731	1.60424	0.808017	0.998396
ENSG00000092330 (TINF2)	ENSG00000092330	TINF2	TERF1 interacting nuclear factor 2	0.214181	4.90913	0.0405076	0.791286
ENSG00000092377 (TBL1Y)	ENSG00000092377	TBL1Y	transducin beta like 1 Y-linked	-0.284946	0.665814	0.514819	0.99492
ENSG00000092421 (SEMA6A)	ENSG00000092421	SEMA6A	semaphorin 6A	-0.282043	5.77676	0.077162	0.85859
ENSG00000092439 (TRPM7)	ENSG00000092439	TRPM7	transient receptor potential cation channel subfamily M member 7	-0.0151946	7.19015	0.916401	0.998731
ENSG00000092445 (TYRO3)	ENSG00000092445	TYRO3	TYRO3 protein tyrosine kinase	0.416883	5.81059	0.0892174	0.872607
ENSG00000092470 (WDR76)	ENSG00000092470	WDR76	WD repeat domain 76	0.235199	1.97694	0.245758	0.953581
ENSG00000092529 (CAPN3)	ENSG00000092529	CAPN3	calpain 3	-0.192631	5.5238	0.330011	0.978808
ENSG00000092531 (SNAP23)	ENSG00000092531	SNAP23	synaptosome associated protein 23	-0.0217954	5.23616	0.827235	0.998725
ENSG00000092621 (PHGDH)	ENSG00000092621	PHGDH	phosphoglycerate dehydrogenase	-0.270166	5.24947	0.394091	0.98756
ENSG00000092758 (COL9A3)	ENSG00000092758	COL9A3	collagen type IX alpha 3 chain	-0.774444	0.602734	0.0900952	0.873014
ENSG00000092820 (EZR)	ENSG00000092820	EZR	ezrin	0.0545526	8.62991	0.704379	0.99492
ENSG00000092841 (MYL6)	ENSG00000092841	MYL6	myosin light chain 6	0.195443	8.39502	0.103235	0.89137
ENSG00000092847 (AGO1)	ENSG00000092847	AGO1	argonaute RISC component 1	-0.181685	6.40772	0.11968	0.90314
ENSG00000092850 (TEKT2)	ENSG00000092850	TEKT2	tektin 2	-0.0901916	0.553352	0.741186	0.995009
ENSG00000092853 (CLSPN)	ENSG00000092853	CLSPN	claspin	0.193275	1.92465	0.562108	0.99492
ENSG00000092871 (RFFL)	ENSG00000092871	RFFL	ring finger and FYVE like domain containing E3 ubiquitin protein ligase	0.191656	6.19245	0.374023	0.985136
ENSG00000092929 (UNC13D)	ENSG00000092929	UNC13D	unc-13 homolog D	-0.0153128	3.14172	0.95623	0.998939
ENSG00000092931 (MFSD11)	ENSG00000092931	MFSD11	major facilitator superfamily domain containing 11	0.137568	4.1186	0.286397	0.971453
ENSG00000092964 (DPYSL2)	ENSG00000092964	DPYSL2	dihydropyrimidinase like 2	0.11211	7.15404	0.396253	0.987767
ENSG00000092969 (TGFB2)	ENSG00000092969	TGFB2	transforming growth factor beta 2	0.127509	2.47427	0.765818	0.995526
ENSG00000092978 (GPATCH2)	ENSG00000092978	GPATCH2	G-patch domain containing 2	0.227875	4.51194	0.0488909	0.812145
ENSG00000093000 (NUP50)	ENSG00000093000	NUP50	nucleoporin 50	0.141298	5.74822	0.185727	0.929403
ENSG00000093009 (CDC45)	ENSG00000093009	CDC45	cell division cycle 45	-0.0819813	-0.836184	0.884388	0.998725
ENSG00000093010 (COMT)	ENSG00000093010	COMT	catechol-O-methyltransferase	-0.162315	5.46729	0.208398	0.943542
ENSG00000093072 (ADA2)	ENSG00000093072	ADA2	adenosine deaminase 2	-0.278124	4.80611	0.366816	0.984616
ENSG00000093100 (AC016026.1)	ENSG00000093100	AC016026.1	novel transcript	-0.0280221	3.46609	0.893943	0.998725
ENSG00000093144 (ECHDC1)	ENSG00000093144	ECHDC1	ethylmalonyl-CoA decarboxylase 1	-0.185931	5.40213	0.361322	0.984616
ENSG00000093167 (LRRFIP2)	ENSG00000093167	LRRFIP2	LRR binding FLII interacting protein 2	0.167709	5.65763	0.137506	0.906621
ENSG00000093183 (SEC22C)	ENSG00000093183	SEC22C	SEC22 homolog C, vesicle trafficking protein	0.0530101	5.20024	0.622346	0.99492
ENSG00000093217 (XYLB)	ENSG00000093217	XYLB	xylulokinase	-0.235324	5.31025	0.254082	0.955813
ENSG00000094631 (HDAC6)	ENSG00000094631	HDAC6	histone deacetylase 6	-0.102107	7.03957	0.590006	0.99492
ENSG00000094661 (OR1I1)	ENSG00000094661	OR1I1	olfactory receptor family 1 subfamily I member 1	0.162913	0.77305	0.518577	0.99492
ENSG00000094755 (GABRP)	ENSG00000094755	GABRP	gamma-aminobutyric acid type A receptor pi subunit	-0.298373	1.91038	0.266595	0.960781
ENSG00000094804 (CDC6)	ENSG00000094804	CDC6	cell division cycle 6	0.545665	0.50685	0.116039	0.89891
ENSG00000094841 (UPRT)	ENSG00000094841	UPRT	uracil phosphoribosyltransferase homolog	0.0608464	3.44958	0.714519	0.99492
ENSG00000094880 (CDC23)	ENSG00000094880	CDC23	cell division cycle 23	0.0409623	4.4658	0.675858	0.99492
ENSG00000094914 (AAAS)	ENSG00000094914	AAAS	aladin WD repeat nucleoporin	0.0308495	4.94317	0.768244	0.996366
ENSG00000094916 (CBX5)	ENSG00000094916	CBX5	chromobox 5	-0.0527613	7.96605	0.688755	0.99492
ENSG00000094963 (FMO2)	ENSG00000094963	FMO2	flavin containing dimethylaniline monoxygenase 2	-0.314538	4.19915	0.332238	0.980232
ENSG00000094975 (SUCO)	ENSG00000094975	SUCO	SUN domain containing ossification factor	0.102776	5.6916	0.401096	0.987767
ENSG00000095002 (MSH2)	ENSG00000095002	MSH2	mutS homolog 2	-0.0796098	4.23502	0.630177	0.99492
ENSG00000095015 (MAP3K1)	ENSG00000095015	MAP3K1	mitogen-activated protein kinase kinase kinase 1	-0.200956	6.28889	0.188012	0.929403
ENSG00000095059 (DHPS)	ENSG00000095059	DHPS	deoxyhypusine synthase	-0.0139028	4.728	0.888817	0.998725
ENSG00000095066 (HOOK2)	ENSG00000095066	HOOK2	hook microtubule tethering protein 2	-0.129957	5.73546	0.276667	0.967339
ENSG00000095139 (ARCN1)	ENSG00000095139	ARCN1	archain 1	0.0350457	6.78603	0.699062	0.99492
ENSG00000095203 (EPB41L4B)	ENSG00000095203	EPB41L4B	erythrocyte membrane protein band 4.1 like 4B	-0.391191	3.44526	0.111435	0.89684
ENSG00000095209 (TMEM38B)	ENSG00000095209	TMEM38B	transmembrane protein 38B	-0.176718	3.8005	0.541806	0.99492
ENSG00000095261 (PSMD5)	ENSG00000095261	PSMD5	proteasome 26S subunit, non-ATPase 5	0.202043	4.64788	0.134334	0.905272
ENSG00000095303 (PTGS1)	ENSG00000095303	PTGS1	prostaglandin-endoperoxide synthase 1	-0.554214	2.38435	0.0520266	0.819875
ENSG00000095319 (NUP188)	ENSG00000095319	NUP188	nucleoporin 188	0.205635	5.36564	0.108677	0.895188
ENSG00000095321 (CRAT)	ENSG00000095321	CRAT	carnitine O-acetyltransferase	-0.0799471	6.07365	0.623575	0.99492
ENSG00000095370 (SH2D3C)	ENSG00000095370	SH2D3C	SH2 domain containing 3C	-0.0366776	3.74095	0.831847	0.998725
ENSG00000095380 (NANS)	ENSG00000095380	NANS	N-acetylneuraminate synthase	0.182923	4.16849	0.187356	0.929403
ENSG00000095383 (TBC1D2)	ENSG00000095383	TBC1D2	TBC1 domain family member 2	0.0154486	3.36839	0.935842	0.998939
ENSG00000095397 (WHRN)	ENSG00000095397	WHRN	whirlin	-0.0291071	3.79483	0.856663	0.998725
ENSG00000095485 (CWF19L1)	ENSG00000095485	CWF19L1	CWF19 like cell cycle control factor 1	0.0949233	3.96147	0.488772	0.993887
ENSG00000095539 (SEMA4G)	ENSG00000095539	SEMA4G	semaphorin 4G	-0.234311	4.97721	0.349469	0.983375
ENSG00000095564 (BTAF1)	ENSG00000095564	BTAF1	B-TFIID TATA-box binding protein associated factor 1	0.227388	6.14333	0.0458951	0.804272
ENSG00000095574 (IKZF5)	ENSG00000095574	IKZF5	IKAROS family zinc finger 5	-0.0158665	4.1338	0.915358	0.998725
ENSG00000095585 (BLNK)	ENSG00000095585	BLNK	B cell linker	-0.0264603	5.22114	0.839275	0.998725
ENSG00000095587 (TLL2)	ENSG00000095587	TLL2	tolloid like 2	-0.0710584	-0.201054	0.823041	0.998725
ENSG00000095627 (TDRD1)	ENSG00000095627	TDRD1	tudor domain containing 1	-1.15191	0.095654	0.0132409	0.588901
ENSG00000095637 (SORBS1)	ENSG00000095637	SORBS1	sorbin and SH3 domain containing 1	-0.0616175	6.62719	0.743758	0.995009
ENSG00000095713 (CRTAC1)	ENSG00000095713	CRTAC1	cartilage acidic protein 1	-0.226555	2.06359	0.620081	0.99492
ENSG00000095739 (BAMBI)	ENSG00000095739	BAMBI	BMP and activin membrane bound inhibitor	-0.0174082	3.41503	0.923545	0.998939
ENSG00000095752 (IL11)	ENSG00000095752	IL11	interleukin 11	0.303664	0.948858	0.394313	0.98756
ENSG00000095777 (MYO3A)	ENSG00000095777	MYO3A	myosin IIIA	-0.213211	1.01723	0.569275	0.99492
ENSG00000095787 (WAC)	ENSG00000095787	WAC	WW domain containing adaptor with coiled-coil	-0.0438402	6.91471	0.67549	0.99492
ENSG00000095794 (CREM)	ENSG00000095794	CREM	cAMP responsive element modulator	0.0251767	3.54849	0.885232	0.998725
ENSG00000095906 (NUBP2)	ENSG00000095906	NUBP2	nucleotide binding protein 2	0.0990658	4.36728	0.393462	0.98756
ENSG00000095932 (SMIM24)	ENSG00000095932	SMIM24	small integral membrane protein 24	0.231244	6.77673	0.279949	0.968639
ENSG00000095951 (HIVEP1)	ENSG00000095951	HIVEP1	HIVEP zinc finger 1	-0.11537	5.64818	0.370735	0.984803
ENSG00000095970 (TREM2)	ENSG00000095970	TREM2	triggering receptor expressed on myeloid cells 2	-0.245075	-0.0944128	0.616697	0.99492
ENSG00000096060 (FKBP5)	ENSG00000096060	FKBP5	FKBP prolyl isomerase 5	0.963139	8.59873	0.072872	0.852233
ENSG00000096063 (SRPK1)	ENSG00000096063	SRPK1	SRSF protein kinase 1	0.103386	5.67523	0.47955	0.990509
ENSG00000096070 (BRPF3)	ENSG00000096070	BRPF3	bromodomain and PHD finger containing 3	-0.137978	6.70052	0.190167	0.931373
ENSG00000096080 (MRPS18A)	ENSG00000096080	MRPS18A	mitochondrial ribosomal protein S18A	0.0989352	4.09413	0.400813	0.987767
ENSG00000096092 (TMEM14A)	ENSG00000096092	TMEM14A	transmembrane protein 14A	-0.14763	2.91605	0.325287	0.978328
ENSG00000096093 (EFHC1)	ENSG00000096093	EFHC1	EF-hand domain containing 1	0.130906	4.73992	0.381252	0.98715
ENSG00000096384 (HSP90AB1)	ENSG00000096384	HSP90AB1	heat shock protein 90 alpha family class B member 1	-0.00738514	8.90463	0.965358	0.998939
ENSG00000096401 (CDC5L)	ENSG00000096401	CDC5L	cell division cycle 5 like	0.0664587	5.21192	0.564159	0.99492
ENSG00000096433 (ITPR3)	ENSG00000096433	ITPR3	inositol 1,4,5-trisphosphate receptor type 3	-0.00157955	6.36498	0.995475	0.998939
ENSG00000096654 (ZNF184)	ENSG00000096654	ZNF184	zinc finger protein 184	0.0762719	3.33883	0.638644	0.99492
ENSG00000096696 (DSP)	ENSG00000096696	DSP	desmoplakin	0.00639575	8.32923	0.957078	0.998939
ENSG00000096717 (SIRT1)	ENSG00000096717	SIRT1	sirtuin 1	0.0224445	4.52148	0.886044	0.998725
ENSG00000096746 (HNRNPH3)	ENSG00000096746	HNRNPH3	heterogeneous nuclear ribonucleoprotein H3	-0.0133853	6.52722	0.910997	0.998725
ENSG00000096872 (IFT74)	ENSG00000096872	IFT74	intraflagellar transport 74	-0.0425791	4.18125	0.775694	0.997394
ENSG00000096968 (JAK2)	ENSG00000096968	JAK2	Janus kinase 2	-0.0786626	5.11729	0.62819	0.99492
ENSG00000096996 (IL12RB1)	ENSG00000096996	IL12RB1	interleukin 12 receptor subunit beta 1	0.380443	0.912496	0.264889	0.959828
ENSG00000097007 (ABL1)	ENSG00000097007	ABL1	ABL proto-oncogene 1, non-receptor tyrosine kinase	-0.0134327	6.85151	0.89666	0.998725
ENSG00000097021 (ACOT7)	ENSG00000097021	ACOT7	acyl-CoA thioesterase 7	-0.373202	5.04488	0.112654	0.89684
ENSG00000097033 (SH3GLB1)	ENSG00000097033	SH3GLB1	SH3 domain containing GRB2 like, endophilin B1	0.0773285	6.26603	0.549809	0.99492
ENSG00000097046 (CDC7)	ENSG00000097046	CDC7	cell division cycle 7	0.824718	1.87671	0.0306973	0.734427
ENSG00000097096 (SYDE2)	ENSG00000097096	SYDE2	synapse defective Rho GTPase homolog 2	-0.215681	4.51978	0.206257	0.943542
ENSG00000099139 (PCSK5)	ENSG00000099139	PCSK5	proprotein convertase subtilisin/kexin type 5	0.183171	5.69161	0.221827	0.948398
ENSG00000099194 (SCD)	ENSG00000099194	SCD	stearoyl-CoA desaturase	-0.127796	5.80402	0.797353	0.998396
ENSG00000099203 (TMED1)	ENSG00000099203	TMED1	transmembrane p24 trafficking protein 1	0.019018	4.06167	0.861467	0.998725
ENSG00000099204 (ABLIM1)	ENSG00000099204	ABLIM1	actin binding LIM protein 1	0.0555687	8.14122	0.664846	0.99492
ENSG00000099219 (ERMP1)	ENSG00000099219	ERMP1	endoplasmic reticulum metallopeptidase 1	-0.145229	6.56838	0.347337	0.983375
ENSG00000099246 (RAB18)	ENSG00000099246	RAB18	RAB18, member RAS oncogene family	0.0662589	5.71515	0.685745	0.99492
ENSG00000099250 (NRP1)	ENSG00000099250	NRP1	neuropilin 1	0.162846	8.7829	0.30858	0.973619
ENSG00000099251 (HSD17B7P2)	ENSG00000099251	HSD17B7P2	hydroxysteroid 17-beta dehydrogenase 7 pseudogene 2	-0.0470673	1.248	0.866557	0.998725
ENSG00000099256 (PRTFDC1)	ENSG00000099256	PRTFDC1	phosphoribosyl transferase domain containing 1	-0.462937	1.45939	0.124046	0.90314
ENSG00000099260 (PALMD)	ENSG00000099260	PALMD	palmdelphin	0.0513737	3.21191	0.827346	0.998725
ENSG00000099282 (TSPAN15)	ENSG00000099282	TSPAN15	tetraspanin 15	0.0501114	3.80721	0.823729	0.998725
ENSG00000099284 (MACROH2A2)	ENSG00000099284	MACROH2A2	macroH2A.2 histone	-0.019826	3.29559	0.895928	0.998725
ENSG00000099290 (WASHC2A)	ENSG00000099290	WASHC2A	WASH complex subunit 2A	0.035842	6.23668	0.749441	0.995009
ENSG00000099308 (MAST3)	ENSG00000099308	MAST3	microtubule associated serine/threonine kinase 3	0.0903158	5.80675	0.611811	0.99492
ENSG00000099326 (MZF1)	ENSG00000099326	MZF1	myeloid zinc finger 1	0.0630863	5.42061	0.58142	0.99492
ENSG00000099330 (OCEL1)	ENSG00000099330	OCEL1	occludin/ELL domain containing 1	0.144668	3.95357	0.286548	0.971453
ENSG00000099331 (MYO9B)	ENSG00000099331	MYO9B	myosin IXB	0.137847	6.29582	0.437779	0.989281
ENSG00000099337 (KCNK6)	ENSG00000099337	KCNK6	potassium two pore domain channel subfamily K member 6	-0.163766	3.54503	0.404054	0.987767
ENSG00000099338 (CATSPERG)	ENSG00000099338	CATSPERG	cation channel sperm associated auxiliary subunit gamma	-0.0757483	2.50765	0.736757	0.994988
ENSG00000099341 (PSMD8)	ENSG00000099341	PSMD8	proteasome 26S subunit, non-ATPase 8	0.20879	5.61104	0.0579527	0.83195
ENSG00000099364 (FBXL19)	ENSG00000099364	FBXL19	F-box and leucine rich repeat protein 19	0.111146	4.80817	0.526075	0.99492
ENSG00000099365 (STX1B)	ENSG00000099365	STX1B	syntaxin 1B	0.0540616	2.12574	0.837063	0.998725
ENSG00000099377 (HSD3B7)	ENSG00000099377	HSD3B7	hydroxy-delta-5-steroid dehydrogenase, 3 beta- and steroid delta-isomerase 7	0.262289	5.04688	0.335355	0.980398
ENSG00000099381 (SETD1A)	ENSG00000099381	SETD1A	SET domain containing 1A, histone lysine methyltransferase	0.0728288	5.5123	0.484183	0.992918
ENSG00000099385 (BCL7C)	ENSG00000099385	BCL7C	BAF chromatin remodeling complex subunit BCL7C	-0.0873869	4.38054	0.500354	0.99492
ENSG00000099622 (CIRBP)	ENSG00000099622	CIRBP	cold inducible RNA binding protein	0.1215	7.55321	0.325022	0.978328
ENSG00000099624 (ATP5F1D)	ENSG00000099624	ATP5F1D	ATP synthase F1 subunit delta	-0.0346155	5.83249	0.76034	0.995009
ENSG00000099625 (CBARP)	ENSG00000099625	CBARP	CACN subunit beta associated regulatory protein	-0.25164	1.65409	0.355378	0.983713
ENSG00000099715 (PCDH11Y)	ENSG00000099715	PCDH11Y	protocadherin 11 Y-linked	-0.267708	0.840609	0.266301	0.960705
ENSG00000099725 (PRKY)	ENSG00000099725	PRKY	protein kinase Y-linked (pseudogene)	0.330262	2.49029	0.279559	0.968573
ENSG00000099769 (IGFALS)	ENSG00000099769	IGFALS	insulin like growth factor binding protein acid labile subunit	-0.108092	-0.438387	0.799006	0.998396
ENSG00000099783 (HNRNPM)	ENSG00000099783	HNRNPM	heterogeneous nuclear ribonucleoprotein M	0.0675893	6.90805	0.542832	0.99492
ENSG00000099785 (MARCHF2)	ENSG00000099785	MARCHF2	membrane associated ring-CH-type finger 2	0.0385826	4.21765	0.715859	0.99492
ENSG00000099795 (NDUFB7)	ENSG00000099795	NDUFB7	NADH:ubiquinone oxidoreductase subunit B7	-0.100304	4.81981	0.36502	0.984616
ENSG00000099797 (TECR)	ENSG00000099797	TECR	trans-2,3-enoyl-CoA reductase	-0.121253	5.84672	0.311439	0.97436
ENSG00000099800 (TIMM13)	ENSG00000099800	TIMM13	translocase of inner mitochondrial membrane 13	0.160382	4.80797	0.173618	0.926446
ENSG00000099804 (CDC34)	ENSG00000099804	CDC34	cell division cycle 34	-0.0916968	4.3102	0.432322	0.989281
ENSG00000099810 (MTAP)	ENSG00000099810	MTAP	methylthioadenosine phosphorylase	0.0382845	5.06859	0.752248	0.995009
ENSG00000099812 (MISP)	ENSG00000099812	MISP	mitotic spindle positioning	-0.0495084	4.51533	0.865724	0.998725
ENSG00000099814 (CEP170B)	ENSG00000099814	CEP170B	centrosomal protein 170B	0.0740185	6.57712	0.641206	0.99492
ENSG00000099817 (POLR2E)	ENSG00000099817	POLR2E	RNA polymerase II subunit E	0.121995	6.16526	0.241654	0.953502
ENSG00000099821 (POLRMT)	ENSG00000099821	POLRMT	RNA polymerase mitochondrial	-0.096927	5.55653	0.43828	0.989281
ENSG00000099822 (HCN2)	ENSG00000099822	HCN2	hyperpolarization activated cyclic nucleotide gated potassium and sodium channel 2	-0.965812	1.54558	0.0150724	0.603011
ENSG00000099834 (CDHR5)	ENSG00000099834	CDHR5	cadherin related family member 5	-0.607433	4.74417	0.520518	0.99492
ENSG00000099840 (IZUMO4)	ENSG00000099840	IZUMO4	IZUMO family member 4	-0.0936785	1.06686	0.73675	0.994988
ENSG00000099849 (RASSF7)	ENSG00000099849	RASSF7	Ras association domain family member 7	0.490846	4.67696	0.0591873	0.83195
ENSG00000099860 (GADD45B)	ENSG00000099860	GADD45B	growth arrest and DNA damage inducible beta	0.345246	5.94274	0.41125	0.988956
ENSG00000099864 (PALM)	ENSG00000099864	PALM	paralemmin	-0.210313	5.82425	0.319311	0.976878
ENSG00000099869 (IGF2-AS)	ENSG00000099869	IGF2-AS	IGF2 antisense RNA	0.0365931	-2.72888	0.960384	0.998939
ENSG00000099875 (MKNK2)	ENSG00000099875	MKNK2	MAPK interacting serine/threonine kinase 2	-0.220889	6.90939	0.110665	0.89684
ENSG00000099889 (ARVCF)	ENSG00000099889	ARVCF	ARVCF delta catenin family member	-0.244509	4.93924	0.12327	0.90314
ENSG00000099899 (TRMT2A)	ENSG00000099899	TRMT2A	tRNA methyltransferase 2 homolog A	0.119772	4.47378	0.291237	0.971453
ENSG00000099901 (RANBP1)	ENSG00000099901	RANBP1	RAN binding protein 1	0.16912	4.34219	0.18459	0.929403
ENSG00000099904 (ZDHHC8)	ENSG00000099904	ZDHHC8	zinc finger DHHC-type palmitoyltransferase 8	0.0548501	5.00066	0.620088	0.99492
ENSG00000099910 (KLHL22)	ENSG00000099910	KLHL22	kelch like family member 22	-0.0981241	4.52981	0.376537	0.986205
ENSG00000099917 (MED15)	ENSG00000099917	MED15	mediator complex subunit 15	0.2382	6.08856	0.11738	0.89994
ENSG00000099940 (SNAP29)	ENSG00000099940	SNAP29	synaptosome associated protein 29	0.0613179	4.98235	0.54328	0.99492
ENSG00000099942 (CRKL)	ENSG00000099942	CRKL	CRK like proto-oncogene, adaptor protein	-0.03015	6.18224	0.740922	0.995009
ENSG00000099949 (LZTR1)	ENSG00000099949	LZTR1	leucine zipper like transcription regulator 1	0.102328	6.0241	0.456885	0.989281
ENSG00000099953 (MMP11)	ENSG00000099953	MMP11	matrix metallopeptidase 11	-0.0945661	1.26022	0.84761	0.998725
ENSG00000099954 (CECR2)	ENSG00000099954	CECR2	CECR2 histone acetyl-lysine reader	-0.0600719	4.0867	0.764185	0.995384
ENSG00000099956 (SMARCB1)	ENSG00000099956	SMARCB1	SWI/SNF related, matrix associated, actin dependent regulator of chromatin, subfamily b, member 1	0.278205	4.97467	0.0331346	0.754903
ENSG00000099957 (P2RX6)	ENSG00000099957	P2RX6	purinergic receptor P2X 6	0.10367	0.518918	0.78114	0.997994
ENSG00000099958 (DERL3)	ENSG00000099958	DERL3	derlin 3	-0.0592862	1.35765	0.911088	0.998725
ENSG00000099968 (BCL2L13)	ENSG00000099968	BCL2L13	BCL2 like 13	0.0315989	6.60138	0.789086	0.998396
ENSG00000099974 (DDTL)	ENSG00000099974	DDTL	D-dopachrome tautomerase like	1.06408	0.905472	0.460246	0.989281
ENSG00000099977 (DDT)	ENSG00000099977	DDT	D-dopachrome tautomerase	0.139062	5.33838	0.354889	0.983713
ENSG00000099991 (CABIN1)	ENSG00000099991	CABIN1	calcineurin binding protein 1	0.00772332	7.21889	0.941634	0.998939
ENSG00000099992 (TBC1D10A)	ENSG00000099992	TBC1D10A	TBC1 domain family member 10A	0.0539097	5.09802	0.74309	0.995009
ENSG00000099994 (SUSD2)	ENSG00000099994	SUSD2	sushi domain containing 2	-0.414325	6.16682	0.119338	0.90314
ENSG00000099995 (SF3A1)	ENSG00000099995	SF3A1	splicing factor 3a subunit 1	0.0872827	6.64547	0.347828	0.983375
ENSG00000099998 (GGT5)	ENSG00000099998	GGT5	gamma-glutamyltransferase 5	0.0778531	6.22471	0.710333	0.99492
ENSG00000099999 (RNF215)	ENSG00000099999	RNF215	ring finger protein 215	-0.0162786	3.82009	0.914892	0.998725
ENSG00000100003 (SEC14L2)	ENSG00000100003	SEC14L2	SEC14 like lipid binding 2	0.240287	3.48284	0.197158	0.935328
ENSG00000100014 (SPECC1L)	ENSG00000100014	SPECC1L	sperm antigen with calponin homology and coiled-coil domains 1 like	-0.0288673	6.34245	0.799325	0.998396
ENSG00000100023 (PPIL2)	ENSG00000100023	PPIL2	peptidylprolyl isomerase like 2	0.0709775	5.85413	0.412246	0.988956
ENSG00000100024 (UPB1)	ENSG00000100024	UPB1	beta-ureidopropionase 1	-0.301698	5.5785	0.41226	0.988956
ENSG00000100027 (YPEL1)	ENSG00000100027	YPEL1	yippee like 1	-0.255385	2.95646	0.282634	0.970291
ENSG00000100028 (SNRPD3)	ENSG00000100028	SNRPD3	small nuclear ribonucleoprotein D3 polypeptide	0.0406833	5.78841	0.730898	0.99492
ENSG00000100029 (PES1)	ENSG00000100029	PES1	pescadillo ribosomal biogenesis factor 1	0.184594	5.36506	0.160152	0.926446
ENSG00000100030 (MAPK1)	ENSG00000100030	MAPK1	mitogen-activated protein kinase 1	-0.000720632	6.98962	0.994275	0.998939
ENSG00000100031 (GGT1)	ENSG00000100031	GGT1	gamma-glutamyltransferase 1	0.28452	7.13256	0.0584383	0.83195
ENSG00000100033 (PRODH)	ENSG00000100033	PRODH	proline dehydrogenase 1	-0.192651	5.19222	0.611307	0.99492
ENSG00000100034 (PPM1F)	ENSG00000100034	PPM1F	protein phosphatase, Mg2+/Mn2+ dependent 1F	-0.0129733	5.64653	0.937707	0.998939
ENSG00000100036 (SLC35E4)	ENSG00000100036	SLC35E4	solute carrier family 35 member E4	0.23953	1.39948	0.212183	0.9443
ENSG00000100038 (TOP3B)	ENSG00000100038	TOP3B	DNA topoisomerase III beta	0.00260925	4.46765	0.983211	0.998939
ENSG00000100053 (CRYBB3)	ENSG00000100053	CRYBB3	crystallin beta B3	-0.408348	-0.379167	0.148878	0.918576
ENSG00000100055 (CYTH4)	ENSG00000100055	CYTH4	cytohesin 4	-0.234498	3.60429	0.522652	0.99492
ENSG00000100056 (ESS2)	ENSG00000100056	ESS2	ess-2 splicing factor homolog	0.0295728	3.64689	0.790881	0.998396
ENSG00000100058 (CRYBB2P1)	ENSG00000100058	CRYBB2P1	crystallin beta B2 pseudogene 1	0.261885	4.02654	0.22391	0.948398
ENSG00000100060 (MFNG)	ENSG00000100060	MFNG	MFNG O-fucosylpeptide 3-beta-N-acetylglucosaminyltransferase	0.0306095	2.7485	0.887601	0.998725
ENSG00000100065 (CARD10)	ENSG00000100065	CARD10	caspase recruitment domain family member 10	0.0642072	5.85177	0.615419	0.99492
ENSG00000100068 (LRP5L)	ENSG00000100068	LRP5L	LDL receptor related protein 5 like	-0.0458101	4.17176	0.765103	0.995526
ENSG00000100075 (SLC25A1)	ENSG00000100075	SLC25A1	solute carrier family 25 member 1	-0.198545	5.99399	0.110205	0.89684
ENSG00000100077 (GRK3)	ENSG00000100077	GRK3	G protein-coupled receptor kinase 3	0.153458	4.42131	0.432707	0.989281
ENSG00000100079 (LGALS2)	ENSG00000100079	LGALS2	galectin 2	0.0115945	4.19068	0.95631	0.998939
ENSG00000100083 (GGA1)	ENSG00000100083	GGA1	golgi associated, gamma adaptin ear containing, ARF binding protein 1	0.0254149	5.69052	0.815301	0.998396
ENSG00000100084 (HIRA)	ENSG00000100084	HIRA	histone cell cycle regulator	0.0529087	5.44193	0.642388	0.99492
ENSG00000100092 (SH3BP1)	ENSG00000100092	SH3BP1	SH3 domain binding protein 1	-0.139771	2.53251	0.665672	0.99492
ENSG00000100097 (LGALS1)	ENSG00000100097	LGALS1	galectin 1	0.123688	4.73175	0.676987	0.99492
ENSG00000100099 (HPS4)	ENSG00000100099	HPS4	HPS4 biogenesis of lysosomal organelles complex 3 subunit 2	-0.0785191	5.38989	0.448671	0.989281
ENSG00000100100 (PIK3IP1)	ENSG00000100100	PIK3IP1	phosphoinositide-3-kinase interacting protein 1	-0.249018	4.61952	0.30015	0.971768
ENSG00000100104 (SRRD)	ENSG00000100104	SRRD	SRR1 domain containing	-0.048578	4.19424	0.68915	0.99492
ENSG00000100105 (PATZ1)	ENSG00000100105	PATZ1	POZ/BTB and AT hook containing zinc finger 1	-0.119069	5.08009	0.261917	0.958014
[truncated: 19,629 more rows]
